# Supplementary material
Source: publisher site journal article supplement (https://www.degruyterbrill.com/publication/isbn/9783111352954/downloadAsset/9783111352954_Loesungen.pdf)
Supplement: Supplementary file 1 [file 9783111352954_Loesungen.pdf]

**Volker Turau und Christoph Weyer**

**Lösungen für das Buch**

# **Algorithmische Graphentheorie**

**5. erweiterte und überarbeitete Auflage**

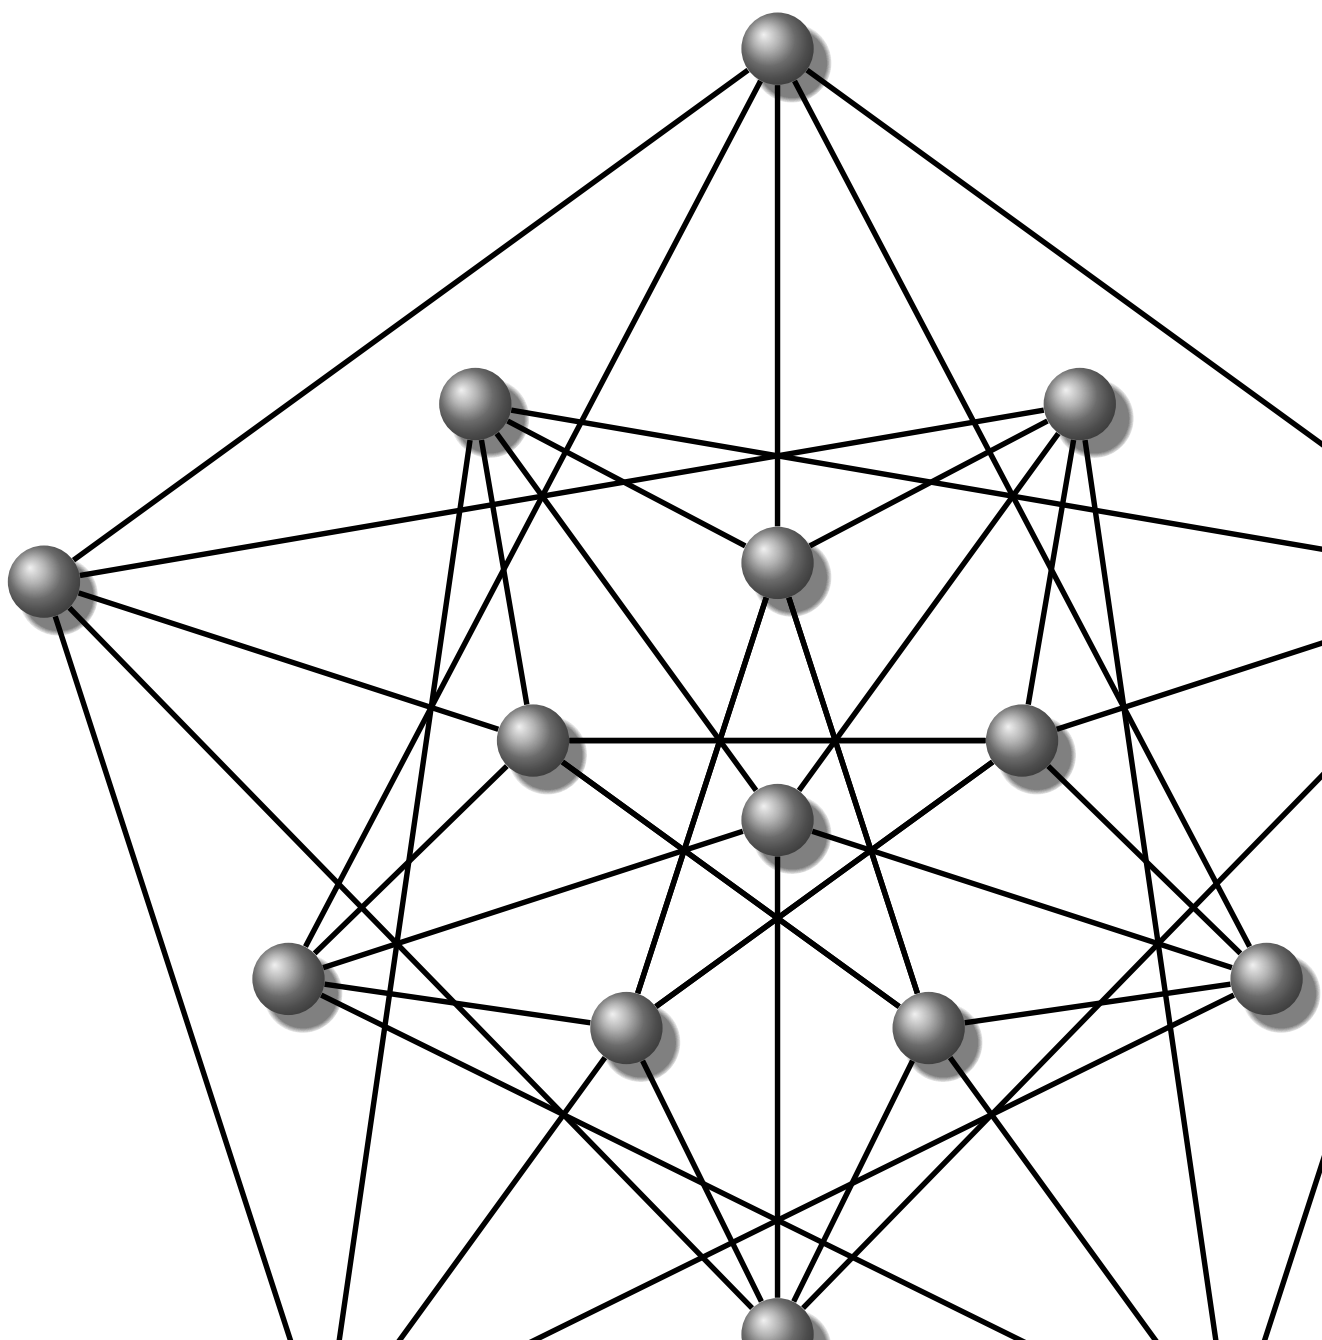

Dieses Dokument enthält die Lösungen zu den Aufgaben aus dem Buch Algorithmische Graphentheorie. Die hier angegebenen Verweise beziehen sich auf die 5. erweiterte und überarbeitete Auflage die 2024 im De Gruyter Verlag erschienen ist. Anmerkungen zu den Lösungen der Aufgaben schicken Sie bitte per e-mail an die Autoren.

Version 1 — Stand Juni 2024

# Inhaltsverzeichnis

|           |                                                               |           |
|-----------|---------------------------------------------------------------|-----------|
| <b>1</b>  | <b>Einleitung</b>                                             | <b>1</b>  |
| <b>2</b>  | <b>Einführung</b>                                             | <b>3</b>  |
| <b>3</b>  | <b>Bäume</b>                                                  | <b>11</b> |
| <b>4</b>  | <b>Suchverfahren in Graphen</b>                               | <b>19</b> |
| <b>5</b>  | <b>Entwurfsmethoden für die algorithmische Graphentheorie</b> | <b>27</b> |
| <b>6</b>  | <b>Färbung von Graphen</b>                                    | <b>31</b> |
| <b>7</b>  | <b>Perfekte Graphen</b>                                       | <b>39</b> |
| <b>8</b>  | <b>Flüsse in Netzwerken</b>                                   | <b>41</b> |
| <b>9</b>  | <b>Anwendungen von Netzwerkalgorithmen</b>                    | <b>49</b> |
| <b>10</b> | <b>Kürzeste Wege</b>                                          | <b>59</b> |
| <b>11</b> | <b>Approximative Algorithmen</b>                              | <b>67</b> |
| <b>12</b> | <b>Randomisierte Algorithmen</b>                              | <b>79</b> |



# Kapitel 1 – Einleitung

1. Der Verbindungszusammenhang der drei Netzwerke von links nach rechts ist 3, 3 und 2 und der Knotenzusammenhang ist 3, 3 und 1.
2. Die farbig gezeichneten Linien bilden das System der Geradensegmente für den gesuchten Weg. Der kürzeste Weg von  $s$  nach  $z$  führt über die Segmente auf der unteren konvexen Hülle, die entsprechenden Geradensegmente sind rot dargestellt.

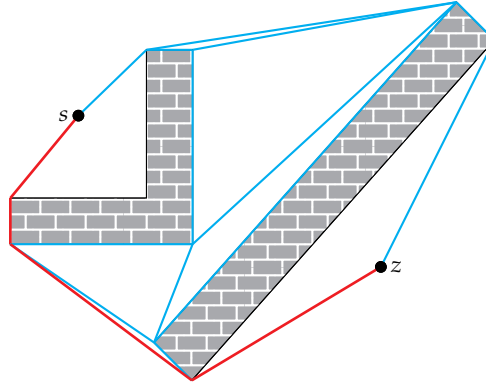

3. Die optimale Reihenfolge der Produktionsaufträge ist 1–3–2–4 mit einer Gesamtumrüstzeit von 5,5.
4. Im Folgenden ist zunächst der Konfliktgraph und dann die Dispatchtabelle für die gegebene Klassenhierarchie und die angegebenen Methoden dargestellt.

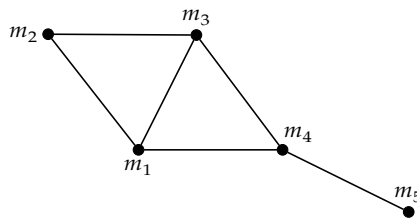

| Methode | $m_1$ | $m_2$ | $m_3$ | $m_4$ | $m_5$ |
|---------|-------|-------|-------|-------|-------|
| Zeile   | 1     | 2     | 3     | 2     | 3     |

|   | A         | B         | C         | D         | E         | F         | G         | H         | I         |
|---|-----------|-----------|-----------|-----------|-----------|-----------|-----------|-----------|-----------|
| 1 | $m_1   A$ | $m_1   B$ | $m_1   C$ | $m_1   D$ | $m_1   A$ | $m_1   F$ | $m_1   G$ |           |           |
| 2 |           | $m_4   B$ | $m_4   B$ | $m_4   B$ | $m_2   E$ | $m_2   E$ | $m_2   E$ | $m_4   H$ | $m_4   H$ |
| 3 |           |           | $m_3   C$ | $m_3   C$ | $m_3   E$ | $m_3   E$ | $m_3   E$ |           | $m_5   I$ |

5. Es gilt

$$\sum_{W \in M} PR(W) = |M|(1-d) + d \sum_{W \in M} \sum_{D \in PL(W)} \frac{PR(D)}{LC(D)}.$$

Da jede Web-Seite  $W$  aus  $M$  genau  $LC(W)$ -mal in der rechten Doppelsumme vorkommt, gilt:

$$\sum_{W \in M} PR(W) = |M|(1-d) + d \sum_{W \in M} LC(W) \frac{PR(W)}{LC(W)}$$

und somit ist

$$\sum_{W \in M} PR(W) = |M|.$$

D. h., die Summe der Werte des PageRank aller Seiten ist gleich der Anzahl der Seiten. Für die Menge aller existierenden Web-Seiten gilt diese Aussage nicht.

6. Es ergibt sich folgendes Gleichungssystem:

$$PR(A) = 0,5 + 0,5 (PR(B) + PR(D)/2);$$

$$PR(B) = 0,5 + 0,5 PR(C);$$

$$PR(C) = 0,5 + 0,5 (PR(A)/2 + PR(D)/2);$$

$$PR(D) = 0,5 + 0,5 PR(A)/2,$$

mit dieser Lösung:

$$PR(A) = 6/5 \quad PR(B) = 1 \quad PR(C) = 1 \quad PR(D) = 4/5.$$

7. Die Dichte des Netzwerks beträgt  $1/3$ . Die Werte der Zentralitätsmaße sind in der folgenden Tabelle enthalten.

|             | A     | B     | C    | D    | E    | F    | G     | H    | I     |
|-------------|-------|-------|------|------|------|------|-------|------|-------|
| Degree      | 0,375 | 0,375 | 0,25 | 0,25 | 0,5  | 0,5  | 0,375 | 0,25 | 0,125 |
| Betweenness | 0,07  | 0,07  | 0    | 0    | 0,29 | 0,29 | 0,43  | 0,25 | 0     |
| Closeness   | 2,25  | 2,25  | 2,63 | 2,63 | 1,88 | 1,88 | 1,63  | 2,25 | 2,63  |

8. Für jede Ecke  $e$  von  $G$  gilt:  $C_B(e) = 0$ ,  $C_D(e) = 1$  und  $C_C(e) = 1$ .
9. Für das soziale Netzwerk mit den Akteuren  $\{e, e_1, e_2, \dots, e_{n-1}\}$  und den dazugehörigen Kanten  $\{(e, e_1), (e, e_2), \dots, (e, e_{n-1})\}$  gilt  $C_B(e) = 1$ .

# Kapitel 2 – Einführung

- Über die Anzahl der Ecken geraden Grades kann keine allgemeine Aussage gemacht werden. Als Beispiel betrachte man die Graphen  $C_n$ .
- Es sei  $G$  ein ungerichteter Graph mit  $n$  Ecken und  $m$  Kanten. Nach Voraussetzung gilt  $3n = 2m$ . Somit ist 2 ein Teiler von  $n$ .
- Es sei  $G$  ein bipartiter Graph mit Eckenmenge  $E_1 \cup E_2$  und  $|E_1| = n_1$ . Dann gilt  $m \leq n_1(n - n_1)$ . Die rechte Seite nimmt ihren größten Wert für  $n_1 = n/2$  ( $n$  gerade) bzw.  $n_1 = (n + 1)/2$  ( $n$  ungerade) an. In beiden Fällen folgt  $4m \leq n^2$ .
- Ist  $\Delta$  der Grad einer Ecke, so gilt  $\Delta|E_1| = \Delta|E_2|$  bzw.  $|E_1| = |E_2|$ .
- Es sei  $e$  eine Ecke mit  $g(e) = \Delta(G)$  und  $e'$  ein beliebiger Nachbar von  $e$ . Dann gilt  $n \geq \Delta(G) + g(e') \geq \Delta(G) + \delta(G)$ . Für einen vollständigen Graph mit  $n > 2$  Ecken gilt  $\Delta(K_n) + \delta(K_n) = 2(n - 1) > n$ .
- Es sei  $W = \langle e_1, \dots, e_s \rangle$  mit  $s \geq 3$  ein einfacher Weg maximaler Länge in  $G$ . Wegen  $g(e_1) \geq 2$  gibt es eine Ecke  $e' \in N(e_1) \setminus \{e_2\}$ . Da  $W$  maximale Länge hat ist  $e' \in \{e_3, \dots, e_s\}$ . Somit enthält  $G$  den geschlossenen Weg  $\langle e', e_1, \dots, e_j, e' \rangle$ .
- Offensichtlich ist  $G_P$  bipartit. Aus der Maximalität von  $P$  folgt  $g_{G_P}(e) \geq g_G(e)/2$  für jede Ecke  $e$  von  $G$ . Die Aussage ergibt sich nun direkt aus der in Kapitel 2 bewiesenen Beziehung zwischen der Summe der Eckengrade und der Anzahl der Kanten eines Graphen.
- Es sei  $G$  ein ungerichteter Graph mit  $m > (n - 1)(n - 2)/2$ . Angenommen, die Eckenmenge von  $G$  lässt sich so in zwei nichtleere Teilmengen  $E_1$  und  $E_2$  zerlegen, dass keine Kante Ecken aus  $E_1$  und  $E_2$  verbindet. Ist  $|E_1| = n_1$ , so gilt
 
$$2m \leq n_1(n_1 - 1) + (n - n_1)(n - n_1 - 1)$$
 (Gleichheit gilt genau dann, wenn beide Teilgraphen vollständig sind). Die rechte Seite dieser Ungleichung wird maximal für  $n_1 = 1$  bzw.  $n_1 = n - 1$ . Dies führt in beiden Fällen zum Widerspruch. Die Graphen  $K_{n-1} \cup K_1$  haben die angegebene Anzahl von Ecken und sind nicht zusammenhängend.
- $K_{n_1} \cup K_{n_2}$ .
- Für jede Ecke  $e$  aus  $G$  gilt  $g(e) + \bar{g}(e) = 5$ , wobei  $\bar{g}(e)$  den Eckengrad von  $e$  im Komplement  $\bar{G}$  von  $G$  bezeichnet. Somit kann man annehmen, dass es in  $G$  eine Ecke  $e$  mit  $g(e) \geq 3$  gibt. Sind die Nachbarn von  $e$  paarweise nicht benachbart, so enthält  $\bar{G}$  den Graphen  $C_3$  und ansonsten gilt dies für  $G$ .
- Es sei  $W = \langle e_1, \dots, e_s, e_1 \rangle$  ein geschlossener Weg. Von  $e_1$  aus startend, verfolge man  $W$ , bis man zum ersten Mal an eine Ecke  $e_j$  kommt, an der man schon einmal war, d.h.  $e_j = e_i$  für  $i < j$ . Da  $W$  geschlossen ist, gibt es auf jeden Fall eine solche Ecke. Dann ist  $\langle e_i, \dots, e_j \rangle$  ein einfacher geschlossener Weg.
- Es sei  $e$  eine Ecke mit Eckengrad  $\Delta(G)$  und  $L$  die Menge der Ecken von  $G$ , welche nicht zu  $e$  benachbart sind (einschließlich  $e$ ). Dann ist nach Voraussetzung jede Kante von  $G$  zu einer Ecke von  $L$  inzident. Nun folgt:

$$m \leq \sum_{a \in L} g(a) \leq \Delta(G)|L| = \Delta(G)(n - \Delta(G)).$$

13. Die Bestimmung des Herzens erfolgt in zwei Phasen. Die erste Phase bestimmt eine Teilmenge  $F$  von  $E$ .

```

F := ∅;
while G.E ≠ ∅ do
  Wähle eine Ecke e aus G.E und füge e in F ein;
  Entferne e und alle Vorgänger von e in G aus G.E;

```

Von jeder Ecke  $e \in E \setminus F$  kann mit einer Kante eine Ecke in  $F$  erreicht werden. Man beachte, dass es für eine neu in  $F$  eingefügte Ecke keine Nachfolger in  $F$  geben kann. In der zweiten Phase werden nun die Ecken von  $F$  in umgekehrter Reihenfolge, in der sie in  $F$  eingefügt wurden, betrachtet.

```

H := ∅;
while F ≠ ∅ do
  Wähle aus F die zuletzt eingefügte Ecke f aus;
  Füge f in H ein und entferne f und alle Vorgänger von f in G aus F;

```

Zwischen den Ecken von  $H$  gibt es keine Kanten und von jeder Ecke  $e \in E \setminus H$  gibt es einen Weg mit höchstens zwei Kanten zu einer Ecke in  $H$ .

14. Angenommen die Aussage ist falsch. Dann gibt es eine Aufteilung der Eckenmenge in disjunkte Teilmengen  $E_1$  und  $E_2$ , sodass nur eine einzige Kante  $k$  zwischen  $E_1$  und  $E_2$  existiert. Es sei  $k = (e, e')$  mit  $e \in E_1$  und  $e' \in E_2$ . Nach dem Entfernen von  $k$  haben die von  $E_1$  und  $E_2$  induzierten Graphen genau eine Ecke mit ungeradem Eckengrad. Dies steht im Widerspruch zu den Ergebnissen aus Abschnitt 2.1.
15. Die Adjazenzmatrix, die Adjazenzliste und die Kantenliste sehen wie folgt aus.

$$\begin{pmatrix}
 0 & 1 & 0 & 0 & 0 & 0 \\
 0 & 0 & 0 & 1 & 0 & 1 \\
 0 & 0 & 0 & 1 & 0 & 0 \\
 0 & 0 & 0 & 0 & 1 & 0 \\
 0 & 0 & 1 & 0 & 0 & 0 \\
 1 & 0 & 0 & 1 & 1 & 0
 \end{pmatrix}$$

$1 \rightarrow 2$   
 $2 \rightarrow 4, 6$   
 $3 \rightarrow 4$   
 $4 \rightarrow 5$   
 $5 \rightarrow 3$   
 $6 \rightarrow 1, 4, 5$

| 1 | 2 | 3 | 4 | 5 | 6 | 7 | 8 | 9 |
|---|---|---|---|---|---|---|---|---|
| 1 | 2 | 2 | 3 | 4 | 5 | 6 | 6 | 6 |
| 2 | 4 | 6 | 4 | 5 | 3 | 1 | 4 | 5 |

16. (a)

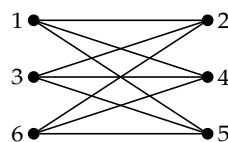

(b) Die Aufteilung der Eckmenge in  $E_1 = \{e_1, e_3, e_6\}$  und  $E_2 = \{e_2, e_4, e_5\}$  zeigt, dass der Graph bipartit ist.

17. Die Funktion  $\text{nachfolger}(e_i, e_j)$  überprüft, ob es eine Kante von  $e_i$  nach  $e_j$  gibt. (Zuerst folgt die einfache, danach die verbesserte Version)

```

function nachfolger( $e_i$  : Ecke,  $e_j$  : Ecke) : Boolean
  var l, obergrenze : Integer;

  l := N[i];
  if i = n then
    obergrenze := m;
  else
    obergrenze := N[i + 1] - 1;
  while l ≤ obergrenze do
    if A[l] = j then
      return true;
    l := l + 1;
  return false

```



```

function nachfolger( $e_i$  : Ecke,  $e_j$  : Ecke) : Boolean
  var l : Integer;
  l := N[i];
  while l ≤ N[i+1] - 1 do
    if A[l] = j then
      return true;
    l := l + 1;
  return false;

```

Die Funktion  $\text{ausgrad}(e_i)$  bestimmt den Ausgrad der Ecke  $e_i$  (zuerst folgt die einfache, danach die verbesserte Version).

```

function ausgrad( $e_i$  : Ecke) : Boolean
  if i = n then
    return m + 1 - N[i];
  else
    return N[i+1] - N[i];

function ausgrad( $e_i$  : Ecke) : Boolean
  return N[i+1] - N[i];

```

Die Funktion  $\text{eingrad}(e_i)$  bestimmt den Eingrad der Ecke  $e_i$ . Hier führt die Einführung des zusätzlichen Eintrags zu keiner Vereinfachung.

```

function eingrad( $e_i$  : Ecke) : Boolean
  var grad, l : Integer;

  grad := 0;
  for l := 1 to m do
    if A[l] = i then
      grad := grad + 1;
  return grad;

```

18. Es sei  $B$  das Feld der Länge  $(n^2 - n)/2$  und  $A$  die Adjazenzmatrix des Graphen. Für natürliche Zahlen  $i, j$  setze:

$$f(i, j) = (i - 1)n - i(i + 1)/2 + j.$$

Dann gilt  $A[i, j] = B[f(i, j)]$  für  $i < j$  und  $A[i, j] = B[f(j, i)]$  für  $i > j$ . Ist  $i > j$ , so sind die Ecken  $e_i$  und  $e_j$  genau dann benachbart, wenn  $B[f(i, j)] \neq 0$  ist. Der Eckengrad  $g(e_i)$  einer Ecke  $e_i$  bestimmt sich wie folgt:

$$g(e_i) = \sum_{k=1}^{i-1} B[f(k, i)] + \sum_{k=i+1}^n B[f(i, k)].$$

19. Um festzustellen, ob zwei Ecken  $e_i$  und  $e_j$  benachbart sind, muss für den Fall  $j \geq i$  die Nachbarliste von  $e_i$  und im anderen Fall die von  $e_j$  durchsucht werden. Die Bestimmung der Anzahl der Nachbarn von  $e_i$  erfordert das Durchsuchen der Nachbarlisten der Ecken  $e_1, \dots, e_i$ . Gegenüber der normalen Adjazenzliste ändert sich der Aufwand für die erste Aufgabe nicht. Für die zweite Aufgabe ist der Aufwand jedoch höher. Für Ecke  $n$  müssen zum Beispiel alle Nachbarschaftslisten durchsucht werden, d. h., der Aufwand ist  $O(n + m)$  gegenüber  $O(g(n))$  bei normalen Adjazenzlisten.

20. Die Funktion  $\text{nachfolger}$  verwendet die Datenstruktur Listenelement:

```

type Listenelement = Struktur
  wert : Integer;
  nachfolger : Zeiger Listenelement;

```

```

var A : Array[1..n] von Zeiger ListenElement;

function nachfolger(ei : Ecke, ej : Ecke) : Boolean
  var eintrag : ListenElement;

  eintrag := A[i];
  while eintrag ≠ null and eintrag → wert ≤ j do
    if eintrag → wert = j then
      return true;
    eintrag := eintrag → nachfolger;
  return false;

```

21. Nummeriert man die Kanten des Graphen aus Aufgabe 15 wie links dargestellt, so ergibt sich folgende Inzidenzmatrix.

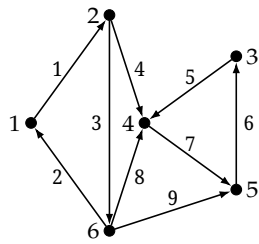

$$\begin{pmatrix}
 1 & -1 & 0 & 0 & 0 & 0 & 0 & 0 & 0 \\
 -1 & 0 & 1 & 1 & 0 & 0 & 0 & 0 & 0 \\
 0 & 0 & 0 & 0 & 1 & -1 & 0 & 0 & 0 \\
 0 & 0 & 0 & -1 & -1 & 0 & 1 & -1 & 0 \\
 0 & 0 & 0 & 0 & 0 & 1 & -1 & 0 & -1 \\
 0 & 1 & -1 & 0 & 0 & 0 & 0 & 1 & 1
 \end{pmatrix}$$

Für ungerichtete Graphen entscheidet folgende Funktionen, ob  $e_j$  ein Nachfolger von  $e_i$  ist.

```

function nachfolger(ei : Ecke, ej : Ecke) : Boolean
  var k : Integer;

  k := 1;
  while k ≤ m do
    if Z[j, k] = 1 and Z[i, k] = -1 then
      return true;
    k := k + 1;
  return false;

```

Für ungerichtete Graphen muss in der if-Bedingung die Zahl  $-1$  durch  $1$  ersetzt werden.

Der Ausgrad einer Ecke  $e_i$  in einem gerichteten Graphen ist gleich der Anzahl der Einträge mit Wert  $1$  in der  $i$ -ten Zeile und der Eingrad gleich der Einträge mit Wert  $-1$  in der  $i$ -ten Zeile. Der Grad einer Ecke  $e_i$  in einem ungerichteten Graphen ist gleich der Anzahl der Einträge mit Wert  $1$  in der  $i$ -ten Zeile.

22. Adjazenzlisten basierend auf Feldern.
23. Eine Datei schließt sich genau dann selbst ein, wenn die zugehörige Ecke in dem gerichteten Graphen auf einem geschlossenen Weg liegt. Dies kann an den Diagonaleinträgen der Erreichbarkeitsmatrix erkannt werden.
24. (a)  $n^2 + 2n + 3 \leq 6n^2$  für  $n \geq 1$ .  
 (b)  $\log n^2 = 2 \log n$  für  $n \geq 1$ .  
 (c)  $\sum_{i=1}^n i = n(n+1)/2 \leq n^2$  für  $n \geq 1$ .  
 (d)  $\log n! = \sum_{i=1}^n \log i \leq n \log n$  für  $n \geq 1$ .
25. Es sei  $A$  die Adjazenzmatrix des Graphen. Eine Ecke  $e_i$  ist genau dann eine Senke, wenn die  $i$ -te Zeile von  $A$  nur Nullen enthält und die  $i$ -te Spalte bis auf den  $i$ -ten Eintrag keine Nullen enthält.

Für einen Eintrag  $a_{ji}$  von  $A$  mit  $j \neq i$  bedeutet dies: Ist  $a_{ji} = 0$ , so ist  $e_i$  keine Senke und ist  $a_{ji} \neq 0$ , so ist  $e_j$  keine Senke. Der folgende Algorithmus entdeckt in jedem Schritt eine Ecke, welche keine Senke ist.

```
i := 1;
for j := 2 to n do
  if A[j, i] = 0 then
    i := j;
```

Nachdem diese Schleife durchlaufen wurde, gibt es nur noch einen Kandidaten für die Senke, den letzten Wert von  $i$ . Die Überprüfung, ob  $e_i$  eine Senke ist, kann mit Aufwand  $O(n)$  durchgeführt werden.

Liegt die Adjazenzliste des Graphen vor, so stellt man mit Aufwand  $O(n)$  fest, ob es genau eine Ecke mit Ausgrad 0 gibt. Falls nicht, so gibt es keine Senke. Andernfalls überprüft man mit Aufwand  $O(m)$ , ob  $e$  in den Nachfolgelisten aller anderen Ecken vorkommt. Falls ja, so ist  $e$  eine Senke und ansonsten gibt es keine Senke.

26. Folgende einfache Eigenschaft von transitiven Reduktionen wird im folgenden verwendet: Es sei  $k = (e, e')$  eine Kante in einer transitiven Reduktion  $R$ . Dann verwendet jeder Weg in  $R$  von  $e$  nach  $e'$  die Kante  $k$ .

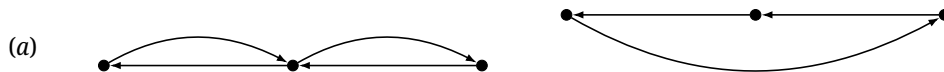

- (b) Angenommen es gibt zwei verschiedene transitive Reduktionen  $R_1$  und  $R_2$ . Es sei  $k = (e_i, e_j)$  eine Kante in  $R_1 \setminus R_2$ . Da  $e_j$  von  $e_i$  in  $R_2$  erreichbar sein muss, gibt es eine Ecke  $e$ , sodass es in  $R_2$  einen Weg von  $e_i$  über  $e$  nach  $e_j$  gibt. Da es in  $R_1$  keine geschlossenen Wege gibt, existieren dort Wege von  $e_i$  nach  $e$  und von  $e$  nach  $e_j$ , welche  $k$  nicht enthalten. Dies kann aber nicht sein.
- (c) Es sei  $G$  der vollständig bipartite Graph mit Eckenmenge  $E_1 \cup E_2$  und  $|E_1| = |E_2| = n/2$ . Jede Kante  $(e_1, e_2)$  mit  $e_1 \in E_1$  und  $e_2 \in E_2$  wird nun in Richtung von den Ecken aus  $E_2$  orientiert. Dieser Graph hat genau die angegebene Eigenschaft.
- (d) Es sei  $R$  die transitive Reduktion eines gerichteten Graphen ohne geschlossene Wege und  $K_R$  die Kantenmenge von  $R$ . Dann ist  $K' \subseteq K_R$ . Angenommen es gilt  $K' \subset K_R$ . Dann existiert eine Kante  $k = (e, e')$  in  $K_R$ , mit  $\max_{\text{len}}(e, e') > 1$  ist, d. h., es gibt einen Weg  $W$  von  $e$  nach  $e'$ , welcher mindestens zwei Kanten enthält. Da der Graph keine geschlossenen Wege besitzt, ist  $k$  nicht in  $W$  enthalten. Dies führt zum Widerspruch und somit gilt  $K_R = K'$ .
27. (a) Der Algorithmus verwendet die in Aufgabe 18 angegebene Funktion  $f$ , um Paare von Ecken in einem eindimensionalen Feld  $A$  zu indizieren. Das Feld wird mit 0 initialisiert. Haben zwei Ecken  $e_i$  und  $e_j$  einen gemeinsamen Nachbarn, so wird dies an der Stelle  $A[f(i, j)]$  eingetragen.

```
function vierWeg(G : Graph) : Boolean
  var vierKreis : Array[1..(n-1)n/2] von Integer;

  Initialisiere vierKreis mit 0;
  foreach e in G.E do
    foreach e_i in N(e) do
      foreach e_j in N(e) \ {e_i} do
        if vierKreis[f(i, j)] ≠ 0 then
          return true;
        else
          vierKreis[f(i, j)] := 1;
  return false;
```

- (b) Die Initialisierung des Feldes `vierKreis` erfordert  $n(n-1)/2$  Schritte. In der anschließenden Suche wird jede Komponente dieses Feldes maximal einmal verändert. Der Aufwand ist somit  $O(n^2)$ .
- (c) Um festzustellen, ob ein Graph einen Untergraph vom Typ  $K_{s,s}$  hat, muss ein Feld der Länge  $\binom{n}{s}$  betrachtet werden. Ferner werden für jede Ecke  $e$  alle  $s$ -elementigen Teilmengen der Nachbarn von  $e$  betrachtet. Daraus ergibt sich ein Aufwand von  $O(n^s)$ .
28. Es sei  $k = (e_i, e_j)$  die zusätzliche Kante und  $k' = (e_{i'}, e_{j'})$  eine Kante, welche neu im transitiven Abschluss liegt (d. h.  $E'[i', j'] = 1$  und  $E[i', j'] = 0$ ). Dann muss es einen einfachen Weg von  $e_{i'}$  nach  $e_{j'}$  geben, welcher  $k$  enthält. Da  $E$  die Erreichbarkeitsmatrix ist, gilt:  $E[i', i] = 1$  und  $E[j, j'] = 1$ . D. h., jede neue Kante geht von einem Vorgänger von  $e_i$  zu einem Nachfolger von  $e_j$ . Folgender Algorithmus bestimmt  $E'$  mit Aufwand  $O(n^2)$ .

```

var E' : Array[1..n, 1..n] von Integer;
Initialisiere E' mit E;
for l := 1 to n do
  if E[l, i] = 1 then
    for s := 1 to n do
      if E[j, s] = 1 then
        E'[l, s] := 1;

```

Es sei  $G$  ein Graph, welcher aus zwei Teilgraphen  $G_1$  und  $G_2$  mit je  $n/2$  Ecken besteht, sodass es keine Kante von  $G_2$  nach  $G_1$  gibt. Ferner besitze  $G_1$  eine Ecke  $e_1$ , von der aus jede Ecke aus  $G_1$  erreichbar ist, und in  $G_2$  eine Ecke  $e_2$ , welche von jeder Ecke aus  $G_2$  erreichbar ist. Wird die Kante  $(e_2, e_1)$  neu in  $G$  eingefügt, so wird jede Ecke von  $G_1$  von jeder Ecke aus  $G_2$  erreichbar. D. h., der neue transitive Abschluss hat  $n^2/4$  zusätzliche Kanten.

29. Die eine Richtung der Behauptung ist trivialerweise erfüllt. Es sei  $\langle e_1, \dots, e_s, e_1 \rangle$  ein geschlossener Weg minimaler Länge. Angenommen es gilt  $s > 3$ . Gibt es die Kante  $(e_3, e_1)$ , dann ist  $\langle e_1, e_2, e_3, e_1 \rangle$  ein geschlossener Weg der Länge 3. Andernfalls gibt es die Kante  $(e_1, e_3)$ , dann aber ist  $\langle e_3, e_4, \dots, e_s, e_1, e_3 \rangle$  ein geschlossener Weg der Länge  $s-1$ . Dieser Widerspruch zeigt, dass es einen geschlossenen Weg der Länge 3 gibt.
30. (a) Angenommen  $G$  enthält eine Ecke  $e$  und Nachbarn  $e_1, \dots, e_6$ , sodass der von  $\{e, e_1, \dots, e_6\}$  induzierte Graph vom Typ  $K_{1,6}$  ist. Dies bedeutet, dass keine der Ecken  $e_1, \dots, e_6$  benachbart sind. Es sei  $\widehat{ee_i}$  die Strecke, welche die zu  $e$  und  $e_i$  gehörenden Punkte verbindet. Dann muss es  $i, j \in \{1, \dots, 6\}$  geben, sodass der Winkel zwischen  $\widehat{ee_i}$  und  $\widehat{ee_j}$  maximal  $60^\circ$  ist. Hieraus folgt, dass der Abstand zwischen den zu  $e_i$  und  $e_j$  gehörenden Punkten maximal  $a$  ist. Somit sind  $e_i$  und  $e_j$  entgegen der Annahme benachbart.
- (b) Es sei  $e$  eine Ecke von  $G$  vom Grad  $\Delta$ . Die zu den  $\Delta$  Nachbarn von  $e$  gehörenden Punkte liegen innerhalb des Kreises mit Radius  $a$  um den zu  $e$  gehörenden Punkt. Dann muss es mindestens  $\lceil \Delta/6 \rceil$  Punkte geben, welche innerhalb eines Kreissektors mit Winkel  $60^\circ$  liegen. Die entsprechenden  $\lceil \Delta/6 \rceil$  Nachbarn von  $e$  sind paarweise benachbart, da die Distanz der zugehörigen Punkte maximal  $a$  ist. Somit bilden diese Ecken zusammen mit  $e$  eine Clique mit  $\lceil \Delta(G)/6 \rceil + 1$  Ecken.
31. (a)  $Q_s$  hat  $2^s$  Ecken, hieraus folgt, dass es  $s2^{s-1}$  Kanten gibt.
- (b) Unterscheiden sich zwei beliebige Ecken  $e_1$  und  $e_2$  von  $Q_s$  in genau  $l$  Positionen, so ist  $d(e_1, e_2) = l$ . Somit gilt  $D(Q_s) \leq s$ . Da der Abstand zwischen den Ecken  $(0, \dots, 0)$  und  $(1, \dots, 1)$  gleich  $s$  ist, gilt  $D(Q_s) = s$ .

32. (a) Für  $n = 3$  ist die Aussage trivialerweise richtig. Sei nun  $n > 3$ . Falls  $G$  hamiltonsch ist, so gilt dies auch für  $G'$ . Sei nun umgekehrt  $G'$  hamiltonsch und  $H$  ein hamiltonscher Kreis von  $G'$ . Liegt die Kante  $(e, e')$  nicht auf  $H$ , dann ist auch  $H$  ein hamiltonscher Kreis für  $G$ . Andernfalls ergibt sich aus  $H$  ein einfacher Weg  $\langle e_1, \dots, e_n \rangle$  mit  $e_1 = e$  und  $e_n = e'$  in  $G$ , auf dem alle Ecken von  $G$  liegen. Im Folgenden werden die Mengen

$$A = \{e_i \mid (e', e_{i-1}) \text{ ist Kante in } G \text{ und } 3 \leq i \leq n-1\}$$

und

$$B = \{e_i \mid (e, e_i) \text{ ist Kante in } G \text{ und } 3 \leq i \leq n-1\}$$

betrachtet. Es gilt  $\{e_1, e_2, e_n\} \cap A = \emptyset$ ,  $\{e_1, e_2, e_n\} \cap B = \emptyset$ ,  $|A| \geq |N(e')| - 1$  und  $|B| = |N(e)| - 1$ . Nun folgt aus der Voraussetzung:

$$n - 3 \geq |A \cup B| = |A| + |B| - |A \cap B| \geq n - 2 - |A \cap B|.$$

Somit ist  $|A \cap B| > 0$ , d. h., es gibt eine Ecke  $e_i$ , sodass  $(e, e_i)$  und  $(e', e_{i-1})$  Kanten in  $G$  sind. Dann ist  $\langle e_1, e_2, \dots, e_{i-1}, e_n, e_{n-1}, \dots, e_i, e_1 \rangle$  ein hamiltonscher Kreis in  $G$ .

- (b) (i) Da vollständige Graphen hamiltonsch sind, kann die Aussage leicht mittels Teil (a) bewiesen werden.
- (ii) Folgt direkt aus (i).
33. Der Petersen-Graph besteht aus zwei Kopien von  $C_5$ , die Ecken dieser beiden Graphen sind durch fünf *Speichen* verbunden (siehe Abbildung 2.10). Man überlegt sich schnell, dass in einem hamiltonschen Kreis entweder genau zwei oder genau vier Speichen vorkommen müssen. Im ersten Fall müssten dann jeweils vier Kanten jeder Kopie des zyklischen Graphen  $C_5$  auf dem hamiltonschen Kreis vorkommen. Dies geht jedoch nicht. Im zweiten Fall müssten von der einen Kopie zwei und von der anderen Kopie drei Kanten auf dem hamiltonschen Kreis liegen. Man sieht sofort, dass auch dies unmöglich ist.



# Kapitel 3 – Bäume

1. (a) Ist  $G$  ein Baum, so gilt  $m = n - 1 < n$ . Gilt umgekehrt  $n > m$ , so betrachte man einen aufspannenden Baum  $B$  von  $G$ . Da  $B$   $n - 1$  Kanten hat, gilt  $m = n - 1$  und somit  $G = B$ .  
 (b) Wenn  $G$  einen einzigen geschlossenen Weg  $W$  enthält, so erhält man einen aufspannenden Baum, falls man eine beliebige Kante aus  $W$  entfernt. Somit hat  $G$  genau  $n - 1 + 1 = n$  Kanten. Ist umgekehrt die Anzahl der Kanten in  $G$  gleich der Anzahl der Ecken, so besteht  $G$  aus einem aufspannenden Baum und einer zusätzlichen Kante. Diese bewirkt, dass es in  $G$  genau einen geschlossenen Weg gibt.  
 (c) Es sei  $G$  ein Wald und  $U$  ein induzierter Untergraph mit  $n$  Ecken und  $m$  Kanten. Da  $U$  ein Wald ist, gilt  $m = n - z < n$  nach den Ergebnissen aus Abschnitt 3.1, hierbei bezeichnet  $z$  die Anzahl der Zusammenhangskomponenten von  $U$ . Hätte jede Ecke mindestens den Grad 2, so wäre  $m \geq n$ . Dieser Widerspruch zeigt, dass  $U$  eine Ecke  $e$  mit  $g(e) \leq 1$  besitzt.  
 Es sei nun  $G$  ein ungerichteter Graph in dem jeder induzierte Untergraph eine Ecke  $e$  mit  $g(e) \leq 1$  besitzt. Angenommen  $G$  enthält einen geschlossenen Weg  $W$ . Es sei  $W_I$  der von den Ecken von  $W$  induzierte Untergraph. Dann gilt  $g(e) \geq 2$  für jede Ecke von  $W_I$ . Dieser Widerspruch zeigt, dass  $G$  ein Wald ist.  
 (d) Es sei  $G$  ein Wald und  $U$  ein zusammenhängender Untergraph. Dann ist  $U$  ein Baum mit Eckenmenge  $E_U$ . Angenommen der von  $E_U$  induzierte Untergraph enthält eine Kante  $k$ , welche nicht in  $U$  enthalten ist. Fügt man  $k$  in  $U$  ein, so entsteht ein geschlossener Weg. Dies ist aber unmöglich, da  $G$  ein Wald ist. Somit ist  $U$  ein induzierter Untergraph.  
 Es sei  $G$  ein Graph, in dem jeder zusammenhängende Untergraph ein induzierter Untergraph ist. Angenommen  $G$  enthält einen geschlossenen Weg  $W$ . Ist  $e$  eine Kante von  $W$ , dann ist  $W \setminus \{e\}$  kein induzierter Untergraph. Somit enthält  $G$  keinen geschlossenen Weg, d. h.,  $G$  ist ein Wald.
2. Es sei  $e$  eine beliebige Ecke und  $G_e$  der von  $e$  und den Nachbarn von  $e$  induzierte Untergraph. Man sieht leicht, dass  $G_e$  ein Windmühlengraph ist. Falls alle Ecken den Grad 2 haben, so ist  $G = W_3 = K_3$ . Hat  $G$  eine Ecke  $e$  mit  $g(e) > 2$ , sodass alle anderen Ecken zu  $e$  inzident sind, so ist  $G$  ebenfalls ein Windmühlengraph. Angenommen  $G$  hat keine dieser beiden Eigenschaften. Es sei  $e$  eine Ecke mit maximalem Eckengrad  $\Delta$ . Dann ist  $\Delta > 2$ . Es sei  $N$  die Menge der Nachbarn von  $e$  und  $e' \neq e$  eine Ecke, welche nicht in  $N$  ist. Für jede Ecke  $u \in N$  gibt es genau eine Ecke  $e_u$ , sodass  $\langle e', e_u, u \rangle$  ein Weg ist. Für  $u_1 \neq u_2$  gilt  $e_{u_1} \neq e_{u_2}$ , sonst wäre  $\langle e, u_1, e_{u_1}, u_2, e \rangle$  ein geschlossener Weg der Länge vier. Somit gilt:  

$$\Delta \geq g(e') \geq g(e) = \Delta, \text{ bzw. } g(e') = g(e).$$

Im Folgenden wird gezeigt, dass  $G$  regulär ist. Dazu muss noch gezeigt werden, dass  $g(e) = g(u)$  für jede Ecke  $u \in N$  gilt. Wiederholt man die Argumentation aus dem letzten Abschnitt mit  $e'$  anstelle von  $e$ , so folgt dass der Eckengrad jeder nicht zu  $e'$  benachbarten Ecke ebenfalls  $\Delta$  ist. Somit verbleibt maximal ein Nachbar  $u$  von  $e$ , von dem noch nicht gezeigt wurde, dass  $g(u) = \Delta$  ist. Wiederholt man die letzte Argumentation für einen Nachbarn  $u' \neq u$  von  $e$ , so folgt auch  $g(u) = \Delta$ , d. h.,  $G$  ist regulär.

Es sei  $A$  die Adjazenzmatrix von  $G$ . Da  $G$  regulär ist, folgt aus der Voraussetzung  $A^2 = (\Delta - 1)I + H$ . Hierbei ist  $I$  die Einheitsmatrix und  $H$  die Matrix, deren Einträge alle gleich 1 sind. Die Matrizen  $A$  und  $H$  sind symmetrisch und es gilt  $AH = HA = \Delta I$ . Somit sind  $A$  und  $H$  simultan diagonalisierbar. Die Eigenwerte von  $H$  sind 1 und 0 mit den Vielfachheiten 1 und  $n - 1$ . Der

Eigenvektor zum Eigenwert 1 ist  $v_1 = (1, \dots, 1)$ . Als Eigenvektor von  $A$  hat  $v_1$  den Eigenwert  $\Delta$ . Es sei  $v$  ein weiterer gemeinsamer Eigenvektor. Dann ist  $Hv = 0$  und somit  $A^2v = (\Delta - 1)v$  bzw.  $Av = \pm\sqrt{\Delta - 1}v$ . Somit sind  $\Delta$ ,  $\sqrt{\Delta - 1}$  und  $-\sqrt{\Delta - 1}$  die Eigenwerte von  $A$  mit den Vielfachheiten 1,  $r$  und  $s$ . Es gilt  $n = 1 + r + s$ . Betrachtet man die Spur von  $A$ , so folgt  $s - r = \Delta/\sqrt{\Delta - 1}$ . Da  $s - r$  eine ganze Zahl ist, muss  $\Delta - 1$  eine Quadratzahl sein, deren Wurzel  $\Delta$  teilt. Hieraus folgt  $\Delta = 2$  im Widerspruch zur Annahme. Somit ist  $G$  ein Windmühlengraph.

3. Die Aussage wird durch vollständige Induktion bewiesen. Für  $n = 2$  ist  $d_1 = d_2 = 1$  und der Graph  $C_2$  ist der gesuchte Baum. Sei nun  $n > 2$ . Es muss Indizes  $i, j$  mit  $d_i = 1$  und  $d_j > 1$  geben. Entfernt man  $d_i$  und  $d_j$  aus der Zahlenfolge und fügt die Zahl  $d_j - 1$  ein, so kann die Induktionsvoraussetzung angewendet werden. An den so erhaltenen Baum muss nur noch eine zusätzliche Kante an die Ecke mit Grad  $d_j - 1$  angehängt werden.
4. Würde es in  $\bar{B}$  drei Zusammenhangskomponenten geben, so gäbe es in  $B$  einen geschlossenen Weg der Länge drei. Da  $B$  ein Baum ist, kann das nicht sein. Nach Voraussetzung besteht  $B$  somit aus zwei Zusammenhangskomponenten. Gäbe es in einer der beiden Zusammenhangskomponenten zwei nicht inzidente Ecken, so würde dies wieder zu einem Widerspruch führen. Somit sind beide Zusammenhangskomponenten vollständige Graphen. Hätten beide Komponenten mehr als eine Ecke, so gäbe es einen geschlossenen Weg der Länge vier in  $B$ . D. h.,  $\bar{B}$  besteht aus einer isolierten Ecke und einem vollständigen Graphen. Hieraus folgt, dass  $B$  ein Sterngraph ist.
5. Ein Binärbaum mit der angegebenen Eigenschaft hat  $2b - 1$  Ecken. Der Beweis erfolgt durch vollständige Induktion. Für  $b = 1$  ist die Aussage klar. Es sei nun  $b > 1$  und  $e$  eine Ecke auf dem vorletzten Niveau von  $B$ . Dann hat  $e$  genau zwei Nachfolger. Entfernt man diese aus  $B$ , so erhält man einen Binärbaum mit  $b - 1$  Blätter für den die Voraussetzung erfüllt ist. Somit hat dieser Baum  $2(b - 1) - 1$  Blätter. Daraus folgt die Aussage.
6. Der Beweis erfolgt durch vollständige Induktion nach der Anzahl  $n_i$  der inneren Ecken. Für  $n_i = 1$  ist die Aussage klar. Sei nun  $n_i > 1$  und  $e'$  eine Ecke auf dem vorletzten Niveau. Entfernt man alle Nachfolger von  $e'$ , so erfüllt der entstandene Wurzelbaum  $G(e')$  die Induktionsvoraussetzung. Es sei  $E_B(e')$  die Menge der Blätter von  $G(e')$ . Dann gilt:

$$|E_B(e')| = \sum_{e \in E \setminus E_B, e \neq e'} (|N^+(e)| - 1) + 1.$$

Da  $|E_B| = |E_B(e')| + |N^+(e')| - 1$  gilt, ist die Aussage bewiesen.

7. Die Anzahl der Blätter in einem Binärbaum ist genau dann maximal, wenn alle Niveaus voll besetzt sind. Somit hat ein Binärbaum der Höhe  $h$  maximal  $2^h$  Blätter.
8. Es sei  $G$  quasi stark zusammenhängend. Folgendes Verfahren bestimmt eine Ecke  $w$  von  $G$  mit der angegebenen Eigenschaft. Es sei zunächst  $w$  eine beliebige Ecke von  $G$ . Gibt es eine Ecke  $e$ , welche nicht von  $w$  erreichbar ist, so muss es eine Ecke  $e'$  geben, sodass  $e$  und  $w$  von  $e'$  erreichbar sind. Setze  $w$  gleich  $e'$  und wiederhole das Verfahren bis alle Ecken von  $w$  erreichbar sind. Besitzt  $G$  eine Ecke mit der angegebenen Eigenschaft, so folgt direkt, dass  $G$  auch quasi stark zusammenhängend ist.
9. Es werden folgende Typen zur Darstellung von Dateien und Verzeichnissen verwendet.

```
type Eintrag = Struktur
  name : String;
  verzeichnis : Boolean;
  inhalt : Zeiger Eintragliste;
  daten : Inhaltstyp;
```

```
type Eintragliste = Struktur
  inhalt : Zeiger Eintrag;
  nachbar : Zeiger Eintragliste;
```



Folgende Prozedur gibt die Namen aller Dateien im angegebenen Verzeichnis und allen darunterliegenden Unterverzeichnissen aus.

```

procedure ausgabeVerzeichnis(e : Zeiger Eintrag)
  var naechster : Zeiger Eintragliste;

  if e ≠ null then
    if e→verzeichnis then
      ausgabe("Verzeichnis : □", e→name);
      naechster := e→inhalt;
      while naechster ≠ null do
        ausgabeVerzeichnis(naechster→inhalt);
        naechster := naechster→nachbar;
    else
      ausgabe("Datei : □", e→name);

```

10. Um einen Eintrag mit dem Schlüssel  $x$  in einem binären Suchbaum zu löschen, muss zunächst die zugehörige Ecke  $e$  lokalisiert werden. Falls  $e$  ein Blatt oder genau einen Nachfolger hat, so kann das Löschen einfach durchgeführt werden. Falls jedoch  $e$  zwei Nachfolger hat, so ist der Vorgang aufwendiger. Ein Algorithmus zum Löschen von Einträgen arbeitet wie folgt.

- (1) Falls  $e$  keine Nachfolger hat, so lösche  $e$ .
- (2) Falls  $e$  genau einen Nachfolger hat, so ersetze  $e$  durch seinen Nachfolger.
- (3) Falls  $e$  zwei Nachfolger hat, so ersetze  $e$  durch die Ecke mit dem größten Schlüssel im linken Teilbaum oder durch die Ecke mit dem kleinsten Schlüssel im rechten Teilbaum von  $e$ . Um die Ecke mit dem größten (kleinsten) Schlüssel im linken (rechten) Teilbaum zu finden, verfolge man vom linken (rechten) Nachfolger der Ecke startend immer den rechten (linken) Nachfolger bis ein Blatt erreicht ist, dies ist die gewünschte Ecke.

11. Die rekursive Prozedur `aufsteigendeReihenfolge` gibt die Objekte eines Suchbaumes in aufsteigender Reihenfolge aus.

```

procedure aufsteigendeReihenfolge(b : Suchbaum)
  if b ≠ null then
    aufsteigendeReihenfolge(b→links);
    ausgabe(b→daten);
    aufsteigendeReihenfolge(b→rechts);

```

12. Bei einem Binärbaum mit zehn Ecken minimaler Höhe sind die ersten drei Ebenen voll besetzt und auf der vierten Ebene sind drei Ecken. Der Baum hat also die Höhe drei. Entartet der Suchbaum zu einer linearen Liste, so liegt ein Binärbaum maximaler Höhe vor (vergleichen Sie Abbildung 3.7).
13. Liegt  $a$  auf einem höheren Niveau als  $b$ , so ist  $l_a > l_b$ . Wäre die Wahrscheinlichkeit von  $a$  echt kleiner als die von  $b$ , so könnte man die Codierung von  $a$  und  $b$  vertauschen und so einen Präfix-Code mit kleinerer mittlerer Wortlänge erhalten. Dies widerspricht der Optimalität des Huffman-Algorithmus.

14.

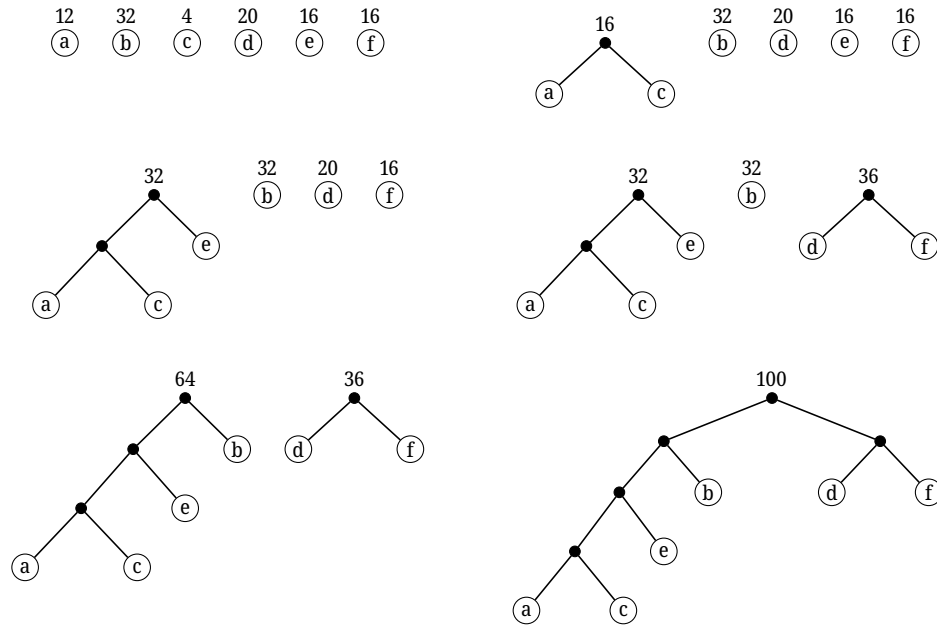

Der erzeugte Präfix-Code hat eine mittlere Codewortlänge von 2,48.

15. Die Prozedur `codeWörter` verwendet einen Stapel `S`. Dieser enthält von unten nach oben die Codierung des aktuellen Zeichens. Initial ist der Stapel leer.

```

var huffman : Wald;
var S : Stapel von Integer;

procedure codeWörter(ew : Ecke)
  if huffman.ecken[w].links = 0 and huffman.ecken[w].rechts = 0 then
    ausgabe("Code für ", huffman.ecken[w].bewertung, " ist: ");
    foreach b in S do
      ausgabe(b);
  else
    S.einfügen(0);
    codeWörter(huffman.ecken[w].links);
    S.entfernen();
    S.einfügen(1);
    codeWörter(huffman.ecken[w].rechts);
    S.entfernen();

```

Der Aufruf `codewörter(huffman.wurzelIn[1])` gibt den Präfix-Code für alle Zeichen aus.

16. Die Kosten eines minimal aufspannenden Baumes betragen 20.

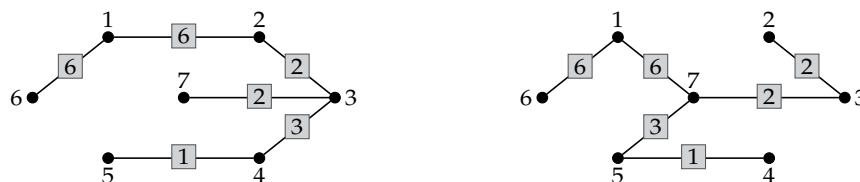

17. Ein aufspannender Baum  $B$  von  $G$ , der  $k$  enthält, heißt  $k$ -minimal aufspannender Baum von  $G$ , falls kein anderer aufspannender Baum  $B'$  von  $G$  existiert, dessen Kosten niedriger sind und der

$k$  enthält. Der Beweis der folgenden Aussage erfolgt analog zum Beweis des ersten Satzes in Abschnitt 3.6 auf Seite 82.

Es sei  $G$  ein kantenbewerteter zusammenhängender Graph mit Eckenmenge  $E$  und  $k = (e, e')$  eine Kante von  $G$ . Ferner sei  $U$  eine Teilmenge von  $E$  mit  $e, e' \in U$  und  $(u, v)$  eine Kante mit minimalen Kosten mit  $u \in U$  und  $v \in E \setminus U$ . Dann existiert ein  $k$ -minimal aufspannender Baum von  $G$ , der die Kante  $(u, v)$  enthält.

Es seien nun  $k_0, k_1, \dots, k_{m-1}$  die Kanten von  $G$  mit  $k_0 = k$ , wobei die Kanten  $k_1, \dots, k_{m-1}$  nach aufsteigenden Bewertungen sortiert sind. Der Algorithmus von Kruskal wird auf  $G$  angewendet, wobei die Kanten in der angegebenen Reihenfolge betrachtet werden. Auf diese Art entsteht ein aufspannender Baum von  $G$ , welcher  $k$  enthält. Der Beweis, dass dies auch ein  $k$ -minimal aufspannender Baum ist, erfolgt analog zum Korrektheitsbeweis des Algorithmus von Kruskal.

18. Zur Konstruktion eines maximal aufspannenden Baumes kann jeder Algorithmus zur Bestimmung eines minimal aufspannenden Baumes verwendet werden. Dazu muss nur die Relation  $\leq$  durch  $\geq$  ersetzt werden. Eine andere Möglichkeit besteht darin, die Bewertung  $b_k$  jeder Kante  $k$  auf  $C - b_k$  zu ändern, wobei  $C$  die höchste Bewertung aller Kanten ist. Danach wird für diese Bewertung ein minimal aufspannender Baum bestimmt. Dieser ist ein maximal aufspannender Baum für die ursprüngliche Bewertung.
19. Für eine Kante  $k$  aus einem aufspannenden Baum  $T$  besteht der Graph  $T \setminus \{k\}$  aus zwei Zusammenhangskomponenten mit Eckenmengen  $E_1, E_2$ . Setze

$$K_k(T) = \{(a, b) \text{ Kante von } G \mid a \in E_1, b \in E_2\}.$$

Es gilt  $K_k(T) \cap T = \{k\}$ . Es sei  $T'$  ein minimal aufspannender Baum von  $G$  und  $T$  der vom Algorithmus erzeugte Baum. Ferner sei  $k \in T \setminus T'$  und  $W$  der geschlossene Weg in  $T' \cup \{k\}$ . Für alle  $k' \in K_k(T) \cap W$  mit  $k' \neq k$  gilt  $k' \in T', k' \notin T$  und  $k \in K_{k'}(T')$ . Da  $k'$  nicht in  $T$  liegt, wurde  $k'$  durch den Algorithmus entfernt. D. h.,  $k'$  war die Kante mit der höchsten Bewertung in einem geschlossenen Weg. Somit ist die Bewertung von  $k'$  mindestens so groß wie die Bewertung jeder von  $k'$  verschiedenen Kante des geschlossenen Weges in  $T \cup \{k'\}$ . Da  $k' \in K_k(T)$  ist, muss  $k$  auf diesem Weg liegen. Somit gilt  $\text{bewertung}(k') \geq \text{bewertung}(k)$ . Da  $T'$  ein minimal aufspannender Baum ist, kann nicht  $\text{bewertung}(k') > \text{bewertung}(k)$  gelten. Somit stimmen die Bewertungen von  $k'$  und  $k$  überein. Ersetzt man in  $T'$  die Kante  $k'$  durch  $k$ , so erhält man einen neuen minimalen aufspannenden Baum  $T''$  mit  $|T'' \cap T| > |T' \cap T|$ . Durch Wiederholung dieser Vorgehensweise zeigt man, dass auch  $T$  ein minimal aufspannender Baum von  $G$  ist.

20. Hat ein Graph eine *Brücke* (vergleichen Sie Aufgabe 14 in Kapitel 2), deren Bewertung größer ist als die aller anderen Kanten, so liegt diese in jedem aufspannenden Baum.
21. Angenommen es gibt zwei verschiedene minimal aufspannende Bäume  $B_1$  und  $B_2$ . Es sei  $k_1$  eine Kante aus  $B_1$ , welche nicht in  $B_2$  liegt. Fügt man  $k_1$  in  $B_2$  ein, so entsteht ein geschlossener Weg  $W$ . Da  $B_2$  ein minimal aufspannender Baum ist und die Kanten verschiedene Bewertungen haben, sind die Bewertungen aller Kanten aus  $W \cap B_2$  echt größer als die von  $k_1$ . Da  $B_1$  ein Baum ist, muss es in  $W \setminus B_1$  eine Kante  $k_2$  mit  $\text{bewertung}(k_1) < \text{bewertung}(k_2)$  geben. Dieses Argument kann nun wiederholt werden. So entsteht eine unendliche Folge von Kanten  $k_1, k_2, \dots$  aus  $G$  mit echt aufsteigenden Gewichten. Dieser Widerspruch zeigt, dass es nur einen minimal aufspannenden Baum gibt.
22. Für dichte Graphen ist der Algorithmus von Prim überlegen. Unter Verwendung von Fibonacci-Heaps ist die Laufzeit dieses Algorithmus  $O(m + n \log n)$ . Der Sortierschritt im Algorithmus von Kruskal hat allein schon einen Aufwand von  $O(m \log n)$ .

23. Die spezielle Eigenschaft der Bewertung kann ausgenutzt werden, um das Sortieren der Kanten nach ihren Bewertungen mit Aufwand  $O(m + c)$  durchzuführen (Zeit und Speicher). Der Algorithmus von Kruskal hat in diesem Fall den Aufwand  $O(m + c + n \log n)$ .
24. Der Beweis erfolgt durch vollständige Induktion nach der Anzahl  $n$  der Ecken. Für  $n = 2$  ist die Aussage klar. Es sei  $n > 1$  und  $k$  die Kante mit der kleinsten Bewertung und  $G'$  der Graph, welcher durch das Verschmelzen der Enden von  $k$  und das Ändern der Bewertungen entsteht. Nach Induktionsvoraussetzung bestimmt der Algorithmus einen minimal aufspannenden Baum  $B'$  von  $G'$ . Nach dem in Abschnitt 3.6 auf Seite 82 bewiesenen Satz gibt es einen minimal aufspannenden Baum  $B$  von  $G$ , welcher  $k$  enthält. Entfernt man  $k$  aus diesem Baum und ändert wie angegeben die Bewertungen der Kanten, so erhält man einen aufspannenden Baum für  $G'$ . Es gilt:

$$\text{kosten}(B') \leq \text{kosten}(B) - n \cdot \text{bewertung}(k)$$

$B'$  ist auch ein Baum in  $G$ . Fügt man die Kante  $k$  zu  $B'$  hinzu und ändert wieder die Bewertungen, so erhält man einen aufspannenden Baum von  $G$  mit Kosten  $n \cdot \text{bewertung}(k) + \text{kosten}(B')$ . Aus obiger Gleichung folgt, dass dieser Baum ein minimal aufspannender Baum von  $G$  ist. Dies ist gleichzeitig auch der Baum, den der Algorithmus konstruiert.

25. Es sei  $G'$  der Graph, welcher aus  $B$ , der neuen Ecke  $e$  und den neuen Kanten besteht. Wendet man den in Aufgabe 19 beschriebenen Algorithmus an, so müssen nur die neuen Kanten in  $B$  eingefügt und entsprechende Kanten entfernt werden. Dies kann mit Aufwand  $O(n \cdot g(e))$  durchgeführt werden. Da der Graph  $G'$   $n - 1 + g(e) < 2n$  Kanten hat, bestimmt sowohl der Algorithmus von Kruskal als auch der von Prim in diesem Fall einen minimal aufspannenden Baum mit Aufwand  $O(n \log n)$ .
26. Auf den Kanten von  $G$  wird auf Basis der alten Bewertung  $w$  eine neue Kantenbewertung  $w'$  wie folgt definiert:  $w'(k) = (w(k), 0)$ , falls  $e$  nicht zu  $k$  inzident ist und  $w'(k) = (w(k), 1)$  andernfalls. Die Bewertungen sind also keine reellen Zahlen, sondern Paare von Zahlen. Damit die Algorithmen von Prim bzw. Kruskal zur Anwendung kommen können, muss gezeigt werden, dass die neue Ordnung die gleiche Eigenschaft wie eine numerische Bewertung hat. Auf den Paaren  $(a, b)$  wird eine totale Ordnung definiert: Es gilt  $(a_1, b_1) < (a_2, b_2)$  genau dann, wenn  $a_1 < a_2$  oder wenn  $a_1 = a_2$  und  $b_1 < b_2$  gilt. Ferner gilt  $(a_1, b_1) = (a_2, b_2)$  genau dann, wenn  $a_1 = a_2$  und  $b_1 = b_2$  gilt. Zur Definition der Kosten eines aufspannenden Baumes bezüglich  $w'$  muss noch eine Addition definiert werden:  $(a_1, b_1) + (a_2, b_2) = (a_1 + a_2, b_1 + b_2)$ . Es sei  $T'$  ein bezüglich  $w'$  minimaler aufspannender Baum. Man zeigt nun leicht, dass  $T'$  die gewünschten Eigenschaften hat. Hierzu betrachte man einen bezüglich  $w$  minimalen aufspannenden Baum  $T$  von  $G$ , für den der Eckengrad von  $e$  minimal ist. Aus  $\text{kosten}_w(T) < \text{kosten}_w(T')$  würde  $\text{kosten}_{w'}(T) < \text{kosten}_{w'}(T')$  folgen, dies widerspricht der Minimalität von  $T'$  bezüglich  $w'$ . Somit ist  $T'$  ein minimal aufspannender Baum bezüglich  $w$  von  $G$ . Da  $\text{kosten}_{w'}(T) = (\text{kosten}_w(T), g_T(e))$  gilt, ist der Eckengrad von  $e$  in  $T'$  minimal. Somit kann das beschriebene Problem mit den Algorithmen von Prim bzw. Kruskal gelöst werden.
27. Angenommen  $k$  liegt in jedem minimal aufspannenden Baum von  $G$ . Es sei  $B$  ein beliebiger minimal aufspannender Baum von  $G$ . Entfernt man  $k$  aus  $B$ , so zerfällt  $B$  in die beiden Zusammenhangskomponenten  $U_1$  und  $U_2$ . Da  $W$  ein geschlossener Weg ist, gibt es auf  $W$  eine Kante  $k' = (u_1, u_2) \neq k$ , mit  $u_1 \in U_1$  und  $u_2 \in U_2$ . Entfernt man  $k$  aus  $B$  und fügt dafür  $k'$  ein, so entsteht wegen  $\text{kosten}(k) \geq \text{kosten}(k')$  ein minimal aufspannender Baum von  $G$ , der  $k$  nicht enthält.
28. Es sei  $B$  ein minimal aufspannender Baum von  $G$  und  $k$  eine der längsten Kanten von  $B$ , die Länge von  $k$  sei  $l(k)$ . Entfernt man  $k$  aus  $B$ , so zerfällt  $B$  in zwei Zusammenhangskomponenten mit den

Eckenmengen  $E_1$  und  $E_2$ . Nach dem in Abschnitt 3.6 auf Seite 82 bewiesenen Satz, ist die Länge jeder Kante in  $G$  zwischen  $E_1$  und  $E_2$  mindestens so lang wie  $k$ . Somit ist für  $R < l(k)$  der Graph  $G_R$  nicht zusammenhängend. D. h.,  $R_{crit}$  ist größer oder gleich der Länge der längsten Kante in  $B$ . Da  $B$  zusammenhängend ist, folgt  $R_{crit} = l(k)$ .



# Kapitel 4 – Suchverfahren in Graphen

1. (a) Es genügt, den Fall  $TSB[i] < TSB[j]$  zu betrachten. Gilt  $TSE[i] < TSB[j]$ , so sind die Intervalle disjunkt. Andernfalls erfolgt der Aufruf von  $tiefensuche(e_j)$  innerhalb des Aufrufs  $tiefensuche(e_i)$ . Somit muss  $TSE[j] < TSE[i]$  gelten, d. h., es gilt die dritte Bedingung.
- (b) Ist  $k$  eine Baum- oder Vorwärtskante, so erfolgt der Aufruf von  $tiefensuche(e_j)$  innerhalb des Aufrufs  $tiefensuche(e_i)$  und endet deshalb auch vor diesem, d. h.

$$TSB[i] < TSB[j] < TSE[j] < TSE[i].$$

Gilt umgekehrt diese Ungleichungskette, so erfolgte der Aufruf  $tiefensuche(e_j)$  innerhalb der Prozedur  $tiefensuche(e_i)$ . Erfolgte der Aufruf direkt, so ist  $k$  eine Baumkante und andernfalls eine Vorwärtskante.

Ist  $k$  eine Rückwärtskante, so erfolgt der Aufruf  $tiefensuche(e_i)$  innerhalb der Prozedur  $tiefensuche(e_j)$  und endet deshalb auch vor diesem, d. h.

$$TSB[j] < TSB[i] < TSE[i] < TSE[j].$$

Gilt umgekehrt diese Ungleichungskette, so erfolgte der Aufruf  $tiefensuche(e_i)$  innerhalb der Prozedur  $tiefensuche(e_j)$ , d. h.,  $e_j$  ist Vorgänger von  $e_i$  und  $k$  ist somit eine Rückwärtskante.

Die Kante  $k$  ist genau dann eine Querkante, wenn der Aufruf  $tiefensuche(e_j)$  schon vor dem Aufruf der Prozedur  $tiefensuche(e_i)$  endet. D. h.,  $k$  ist genau dann eine Querkante, wenn

$$TSB[j] < TSE[j] < TSB[i] < TSE[i]$$

gilt.

2. Die Aussage ist wahr. Innerhalb des Aufrufs  $tiefensuche(e_i)$  werden alle von  $e_i$  erreichbaren unbesuchten Ecken besucht. Wegen  $tsNummer[i] < tsNummer[j]$ , muss  $e_j$  im Tiefensuchebaum von  $e_i$  erreichbar sein.
3. Die Adjazenzmatrix hat auf und unterhalb der Diagonalen nur Nullen.
4. Nein, dies zeigt eine topologische Sortierung, die zwischen zwei Teilgraphen *hin- und herspringt*. Betrachten Sie folgendes Beispiel:

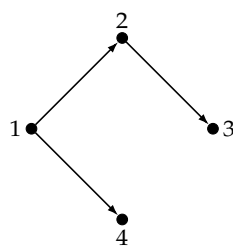

| Ecke              | $e_1$ | $e_2$ | $e_3$ | $e_4$ |
|-------------------|-------|-------|-------|-------|
| Sortierungsnummer | 1     | 2     | 4     | 3     |

5. Ist  $w$  die Wurzel des Baumes, so ist  $höhe(w)$  die Höhe des Wurzelbaumes.

```

function höhe( $e_i$  : Ecke) : Integer;
var hmax : Integer;

hmax := 0;
foreach  $e_j$  in  $N(e_i)$  do
    hmax := max(hmax, höhe( $e_j$ ) + 1);
return hmax;

```

6.  $\{2, 4, 5, 6\}, \{1\}, \{3\}, \{7\}, \{8\}$
7. Es sei  $T$  ein Tiefesuchebaum von  $G'$  mit Wurzel  $e_1$  und  $e_i, e_j$  Ecken aus  $T$ . Als Ecke  $e_1$  besucht wurde, war  $e_i$  noch nicht besucht worden. Somit ist  $\text{TSE}[1] > \text{TSE}[i]$ . D.h., der Aufruf von  $\text{tiefensuche}(e_i)$  war vor dem Aufruf von  $\text{tiefensuche}(e_1)$  beendet. Da  $e_i$  in  $G'$  von  $e_1$  erreichbar ist, ist  $e_1$  in  $G$  von  $e_i$  erreichbar. Wäre  $e_i$  vor  $e_1$  in  $G$  betrachtet worden, so wäre  $\text{TSE}[i] > \text{TSE}[1]$ . Somit wurde  $e_1$  vor  $e_i$  in  $G$  betrachtet. Aus  $\text{TSE}[1] > \text{TSE}[i]$  folgt nun, dass der Aufruf von  $\text{tiefensuche}(e_i)$  in  $G$  innerhalb des Aufrufs  $\text{tiefensuche}(e_1)$  erfolgte. Somit ist  $e_i$  in  $G$  von  $e_1$  erreichbar, d. h.,  $e_i$  und  $e_1$  liegen auf einem geschlossenen Weg in  $G$ . Das gleiche gilt für  $e_j$  und  $e_1$  und somit auch für  $e_i$  und  $e_j$ . Hieraus folgt, dass die Ecken von  $T$  in einer starken Zusammenhangskomponente von  $G$  liegen.

Sind umgekehrt  $e_1$  und  $e_2$  Ecken von  $G$ , welche in einer starken Zusammenhangskomponente liegen, so liegen  $e_1$  und  $e_2$  in  $G$  und  $G'$  auf einem geschlossenen Weg. Somit müssen auch  $e_1$  und  $e_2$  im gleichen Tiefesuchebaum von  $G'$  liegen. Hieraus folgt, dass die Ecken einer starken Zusammenhangskomponente von  $G$  in einem Tiefesuchebaum von  $G'$  liegen.

8. Es wird eine topologische Sortierung des DAG's betrachtet. Die Ecke mit Sortierungsnummer 1 hat Eingrad 0 und die mit Sortierungsnummer  $n$  hat Ausgrad 0. Eine Ecke mit Ausgrad 0 findet man, indem man an einer beliebigen Ecke einen einfachen Weg startet. Da der Graph keine geschlossenen Wege hat, endet der Weg an einer Ecke mit Ausgrad 0. Ein Algorithmus zur Bestimmung einer topologischen Sortierung sucht wiederholt eine Ecke mit Ausgrad 0, entfernt diese und alle inzidenten Kanten aus  $G$  und nummeriert die entfernten Ecken in absteigender Reihenfolge. Da die Bestimmung einer Ecke mit Ausgrad 0 den Aufwand  $O(n)$  hat, ergibt sich ein Gesamtaufwand von  $O(n^2)$ . Der auf der Tiefensuche aufbauende Algorithmus arbeitet mit Aufwand  $O(n + m)$ .
9. Zwei Ecken  $e_i$  und  $e_j$  sind genau dann in einer starken Zusammenhangskomponenten, wenn sie auf einem geschlossenen Weg liegen. Dies ist genau dann der Fall, wenn  $e_{ji}$  und  $e_{ij}$  beide ungleich 0 sind, bzw. wenn  $e_{ji}e_{ij}$  ungleich 0 ist. Hierbei ist  $E = (e_{ij})$ . Für den  $i$ -ten Diagonaleintrag  $d_i$  von  $E^2$  gilt:

$$d_i = e_{1i}e_{i1} + \dots + e_{ji}e_{ij} + \dots + e_{ni}e_{in}.$$

Ist  $d_i = 0$ , so bildet Ecke  $e$  eine komplette Zusammenhangskomponente. Ist  $d_i \neq 0$ , so ist  $e_{ii} = 1$ . Ferner gibt es noch  $d_i - 1$  weitere Ecken  $e_j$  mit  $e_{ji}e_{ij} \neq 0$ . Hieraus folgt sofort die Aussage.

10. Der Algorithmus basiert auf der Tiefensuche.

```

var besucht : Array[0..n] von Boolean;
var vorgänger : Array[0..n] von Ecke;

function geschlossenerWeg(G : Graph) : Boolean
  var e_i : Ecke;
  Initialisiere besucht mit false und vorgänger mit  $\perp$ ;
  foreach e_i in G.E do
    if not besucht[i] then
      if tiefensuche(e_i) then
        return true;
  return false;

function tiefensuche(e_i : Ecke) : Boolean
  var e_j : Ecke;
  besucht[i] := true;
  foreach e_j in N(e_i) do
    if not besucht[j] then

```



```

    vorgänger[j] := ei;
    if tiefensuche(ej)
        return true;
    else if vorgänger[j] ≠ ei then
        return true;
    return false;

```

Am Ende des Algorithmus hat der Algorithmus einen Baum durchlaufen, d. h., die Anzahl der betrachteten Kanten ist kleiner als  $n$ . Somit ist die Laufzeit  $O(n)$ .

11. Es werden zwei Tiefensuchedurchgänge gestartet mit den Startecken  $e_i$  bzw.  $e_j$ . Hierbei wird das gleiche Feld `tsNummer` benutzt (im zweiten Durchgang wird es nicht mehr initialisiert). Jede nicht besuchte Ecke ist weder von  $e_i$  noch von  $e_j$  erreichbar und muss somit entfernt werden. Bei der Verwendung von Adjazenzlisten basierend auf Zeigern müssen nur die entsprechenden Listen komplett entfernt werden. Somit ist der Aufwand  $O(n + m)$ .
12. Das Feld `trennendeEcken` zeigt nach Aufruf der gleichnamigen Prozedur an, welche Ecken trennende Ecken sind.

```

var tsNummer, minNummer : Array[1..n] von Integer;
var vorgänger : Array[1..n] von Ecke;
var zähler : Integer;
var trennendeEcken : Array[1..n] von Boolean;

procedure trennendeEcken(G : Graph)
    var ei : Ecke;

    Initialisiere tsNummer und zähler mit 0;
    Initialisiere trennendeEcken mit false;
    foreach ei in G.E do
        if tsNummer[i] = 0 then
            blöcke(ei);
            if ei ist mehr als einmal in vorgänger enthalten then
                trennendeEcken[i] := true;
            else
                trennendeEcken[i] := false;

procedure blöcke(ei : Ecke)
    var ej : Ecke;

    zähler := zähler + 1;
    tsNummer[i] := minNummer[i] := zähler;
    foreach ej in N(ei) do
        if tsNummer[j] = 0 then
            vorgänger[j] := ei;
            blöcke(ej);
            if minNummer[j] ≥ tsNummer[i] then
                trennendeEcken[i] := true;
            else
                minNummer[i] := min(minNummer[i], minNummer[j]);
        else
            if ej ≠ vorgänger[i] then
                minNummer[i] := min(minNummer[i], tsNummer[j]);

```

13. Links sind die Blöcke des Graphen und rechts ist der Blockbaum dargestellt.

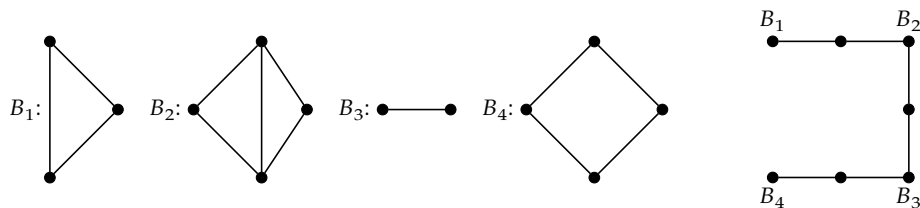

14. Ist  $(e_i, e_j)$  eine Brücke, so muss  $e_i$  oder  $e_j$  eine trennende Ecke sein. Ist eine der beiden Ecken keine trennende Ecke, so kann diese keine weiteren Nachbarn haben, d. h., der Grad ist gleich 1. Die umgekehrte Aussage ist offensichtlich.
15. Der Beweis erfolgt durch vollständige Induktion nach  $b$ . Ist  $b = 1$ , so ist  $t = 0$  und die Aussage ist wahr. Sei  $b > 1$ ,  $B$  ein Block, welcher zu einem Blatt im Blockbaum gehört, und  $e$  die zugehörige Ecke. Entferne aus  $G$  alle Ecken in  $B \setminus \{e\}$ . Der neue Graph hat  $b - 1$  Blöcke und mindestens  $t - 1$  trennende Ecken. Die Aussage folgt nun aus der Induktionsvoraussetzung.
16. Ist der Graph zweifach zusammenhängend, so ist keine Ecke eine trennende Ecke. Andernfalls hat der Blockbaum mindestens zwei Blätter (jeder Baum mit mindestens zwei Ecken hat auch mindestens zwei Blätter). Ein Block, welcher zu einem Blatt im Blockbaum gehört, hat mindestens eine Ecke, welche nicht trennend ist.
17. Eine Kante liegt genau dann auf einem geschlossenen Weg, wenn sie zu einer starken Zusammenhangskomponente von  $G$  gehört. Mit dem in Abschnitt 4.5 beschriebenen Verfahren werden zunächst die starken Zusammenhangskomponenten bestimmt. Die gesuchte Kantenmenge besteht aus allen Kanten von  $G$ , welche in keiner starken Zusammenhangskomponente liegen.
18. Wendet man die Breitensuche  $n$ -mal auf den Graphen an, wobei jedes Mal eine andere Startecke gewählt wird, so werden für jede Ecke die erreichbaren Ecken bestimmt. Der Aufwand ist  $O(nm)$ .
19. Es sei  $e$  eine beliebige Ecke und  $l_e$  die Länge des kürzesten Weges, der  $e$  enthält. Es wird eine Breitensuche mit Startecke  $e$  gestartet. Sei  $e_j$  die erste Ecke, welche die Breitensuche zum zweiten Mal besucht und  $e_i$  der aktuelle Vorgänger von  $e_j$ . Dann gilt

$$\text{niv}(e_j) = \text{niv}(e_i) \text{ oder } \text{niv}(e_j) = \text{niv}(e_i) + 1.$$

Im ersten Fall liegt ein geschlossener Weg der Länge  $2 \text{niv}(e_i) + 1$  und im zweiten Fall der Länge  $2 \text{niv}(e_i) + 2$  vor. Im ersten Fall gilt  $l_e = 2 \text{niv}(e_i) + 1$  und im zweiten  $l_e = 2 \text{niv}(e_i) + 2$  oder  $l_e = 2 \text{niv}(e_i) + 1$ . Um eine Unterscheidung zu treffen, müssen alle Ecken  $e'$  mit  $\text{niv}(e') = \text{niv}(e_i)$  abgearbeitet werden. Danach kann die Breitensuche beendet werden. Trifft man dabei auf eine weitere schon besuchte Ecke  $e_j$  mit  $\text{niv}(e_j) = \text{niv}(e_i)$ , so gilt  $l_e = 2 \text{niv}(e_i) + 1$  und andernfalls  $l_e = 2 \text{niv}(e_i) + 2$ .

Ein Algorithmus zur Bestimmung der Länge eines kürzesten Weges startet von jeder Ecke  $e$  eine Breitensuche. Diese wird wie beschrieben benutzt, um die Länge des kürzesten geschlossenen Weges  $W$  mit  $e \in W$  zu bestimmen. So erhält man die Länge des kürzesten geschlossenen Weges des Graphen mit Aufwand  $O(nm)$ .

20. Zunächst wird in linearer Zeit eine topologische Sortierung des Graphen bestimmt. Danach werden die Ecken in umgekehrter Reihenfolge ihrer topologischen Sortierungsnummern bearbeitet und die Menge der erreichbaren Ecken wie folgt bestimmt:

$$\text{erreichbar}(e_i) := \bigcup_{e_j \in N^+(e_i)} \text{erreichbar}(e_j) \cup \{e_j\}.$$

21. Hat der Tiefensuchebaum die Höhe 1, so ist der Graph ein Sterngraph, wobei die Tiefensuche an der zentralen Ecke startete. In diesem Fall stimmen Tiefensuche- und Breitensuchebaum überein. Für den vollständigen Graph hat der Tiefensuchebaum die Höhe  $n - 1$ . In diesem Fall ist der Breitensuchebaum ebenfalls ein Sterngraph, d. h., er hat die Höhe 1.
22. Zur Bestimmung der Zusammenhangskomponenten eines ungerichteten Graphen mithilfe der Breitensuche kann die Prozedur `zhkGraph` aus Abbildung 4.14 verwendet werden. Für die Änderung wird der Aufruf der Prozedur `zhk( $e_i$ )` durch den Aufruf `breitensuche( $G, e_i$ )` ersetzt. Die Prozedur `breitensuche` aus Abbildung 4.25 muss dabei geringfügig geändert werden. Anstatt dem Feld `niveau` wird das Feld `zhkNummer` verwendet. Die Prozedur `breitensuche` sieht dann wie folgt aus.

```

procedure breitensuche( $G$  : Graph,  $e_s$  : Ecke)
  var  $e_i, e_j$  : Ecke;
  var  $W$  : Warteschlange von Ecke;

   $zhkNummer[s] := \text{zähler};$ 
   $W.\text{einfügen}(e_s);$ 
  while  $W \neq \emptyset$  do
     $e_i := W.\text{entfernen}();$ 
    foreach  $e_j$  in  $N(e_i)$  do
      if  $zhkNummer[j] = 0$  then
         $zhkNummer[j] := \text{zähler};$ 
         $W.\text{einfügen}(e_j);$ 

```

23. Die Änderungen an der Funktion `breitensuche` lassen den Aufwand von  $O(m + n)$  unverändert.

```

function breitensuche( $G$  : Graph,  $e_s$  : Ecke) : Graph
  var  $e_i, e_j$  : Ecke;
  var  $W$  : Warteschlange von Ecke;
  var  $niveau$  : Array[1.. $n$ ] von Integer;
  var  $B$  : Graph;

  Initialisiere niveau mit -1;
  Initialisiere B mit den Ecken von G;
   $niveau[s] := 0;$ 
   $W.\text{einfügen}(e_s);$ 
  while  $W \neq \emptyset$  do
     $e_i := W.\text{entfernen}();$ 
    foreach  $e_j$  in  $N(e_i)$  do
      if  $niveau[j] = -1$  then
         $niveau[j] := niveau[i] + 1;$ 
         $W.\text{einfügen}(e_j);$ 
        Füge Kante ( $e_i, e_j$ ) in B ein;
      else if  $niveau[j] = niveau[i] + 1$  then
        Füge Kante ( $e_i, e_j$ ) in B ein;
  return  $B;$ 

```

24. (a) Der Beweis erfolgt durch vollständige Induktion nach  $n$ . Für  $n = 1$  ist die Aussage wahr. Sei nun  $n > 1$  und  $e$  eine Ecke von  $B$  mit  $g^+(e) = 0$ . Setze  $G' = G \setminus \{e\}$  und  $B' = B \setminus \{e\}$ . Da  $B'$  die gleichen Eigenschaften wie  $B$  hat, folgt aus der Induktionsvoraussetzung, dass  $B'$  ein Tiefensuchebaum von  $G'$  ist. Es sei nun  $e'$  der Vorgänger von  $e$  in  $B$  und  $(e, e')$  mit  $e'' \neq e'$  eine Kante in  $G$ . Nach Voraussetzung ist  $e''$  Vorgänger von  $e$  in  $B$ , d. h., wenn die Tiefensuche bei Ecke  $e'$  ankommt, sind schon alle Nachbarn von  $e$  besucht worden. Somit wird nach  $e'$  die Ecke  $e$  besucht und sofort wieder zu  $e'$  zurückgekehrt. Also ist  $B$  ein Tiefensuchebaum von  $G$ .

(b) Für eine beliebige Ecke  $e'$  von  $G$  bezeichne  $d_B(e, e')$  die Länge des Weges von  $e$  nach  $e'$  in  $B$ . Mittels vollständiger Induktion nach  $d(e, e')$  wird gezeigt, dass  $d_B(e, e') = d(e, e')$  für alle Ecken  $e'$  von  $G$  gilt. Ist  $d(e, e') = 0$ , so ist  $e' = e$  und die Aussage ist wahr. Sei nun  $d(e, e') > 0$  und  $e''$  der Vorgänger von  $e'$  in  $G$  auf dem Weg von  $e$  nach  $e'$ . Dann ist  $d(e, e'') < d(e, e')$  und somit ist  $d_B(e, e'') = d(e, e'')$  nach Induktionsvoraussetzung. Also gilt:  $d_B(e, e') \geq d(e, e') = d(e, e'') + 1 = d_B(e, e'') + 1$ . Da  $(e', e'')$  eine Kante in  $G$  ist, unterscheiden sich  $d_B(e, e')$  und  $d_B(e, e'')$  maximal um 1. Hieraus folgt  $d_B(e, e') = d(e, e')$ . Man beachte, dass  $B$  nicht notwendigerweise durch die in Abschnitt 4.8 beschriebene Realisierung der Breitensuche erzeugt werden kann.

25. Da  $B$  keine geschlossenen Wege enthält, können die Verfahren etwas vereinfacht werden. Wird die Tiefensuche wie in Abschnitt 4.2 beschrieben mithilfe eines Stapels realisiert, so ist der Speicheraufwand proportional zur maximalen Stapeltiefe. Da im ungünstigsten Fall bis zu den Blättern gesucht werden muss, ist der Speicheraufwand  $O(H)$ . Bei der iterativen Tiefensuche wird keine Ecke jenseits von Tiefe von  $e$  betrachtet. Somit ist der Speicheraufwand  $O(d_e)$  mit  $d_e = d(w, e)$ . Der Speicheraufwand der Breitensuche ist proportional zur Länge der Warteschlange. Im ungünstigsten Fall wird die gesuchte Ecke als letzte Ecke in dem entsprechenden Niveau betrachtet. Da in diesem Fall alle Ecken aus Niveau  $d_e$  in der Warteschlange sind, ist der Speicheraufwand  $O(b^{d_e})$ .

Die Laufzeit der drei Suchverfahren ist proportional zur Anzahl der betrachteten Ecken. Bei der Tiefensuche müssen alle Ecken bis auf die Nachfolger von  $e$  besucht werden. Bei der Breitensuche alle Ecken im gleichen oder in vorhergehenden Niveaus. Für die Tiefensuche sind dies  $(b^{H-d_e+1} - 1)/(b - 1)$  und für die Breitensuche  $(b^{d_e+1} - 1)/(b - 1)$  Ecken. Bei der iterativen Tiefensuche werden maximal  $b^{d_e+2}/(b - 1)^2$  Ecken betrachtet (vergleichen Sie Abschnitt 4.10).

26. Ist  $(e, e')$  eine Rückwärtskante eines ungerichteten Graphen, so ist entweder  $e$  ein Vorgänger oder ein Nachfolger von  $e'$  im Tiefensuchewald, d. h., Rückwärtskanten verbinden niemals Blätter des Tiefensuchebaums. Da auch Vorwärtskanten keine Blätter verbinden, ist die Aussage bewiesen.
27. Der Algorithmus ist eine Variante der Tiefensuche angewendet auf die Ausgangsecke des inversen Graph des Schaltkreises (d. h., die Richtung jeder Kante des Graphen wird umgedreht).

```
function schaltkreis(e : Ecke) : Boolean
  switch e.art begin
    case Eingabeecke :
      return Wert(e);
    case Konjunktion :
      return schaltkreis(Nachfolger1(e)) and schaltkreis(Nachfolger2(e));
    case Disjunktion :
      return schaltkreis(Nachfolger1(e)) or schaltkreis(Nachfolger2(e));
    case Negation :
      return not schaltkreis(Nachfolger(e));
    case Ausgabeecke :
      return schaltkreis(Nachfolger(e));
```

28. (a) Die Aussage folgt direkt aus der Beobachtung, dass stark zusammenhängende Graphen auch halbzusammenhängend sind.
- (b) Man bestimme eine topologische Sortierung des kreisfreien Strukturgraphen  $\widehat{G}$ . Die Ecken  $e_1, e_2, \dots, e_n$  seien gemäß ihrer Sortierungsnummern nummeriert. Zunächst wird folgende Aussage bewiesen:  $\widehat{G}$  ist genau dann halbzusammenhängend, wenn für  $i > 0$  Ecke  $e_i$  ein direkter Vorgänger von  $e_{i+1}$  ist. Gilt diese Bedingung, so existiert der Weg  $\langle e_1, \dots, e_n \rangle$ , d. h.,  $\widehat{G}$  ist halbzusammenhängend. Sei nun  $\widehat{G}$  halbzusammenhängend. Für  $i > 0$  muss es in  $\widehat{G}$

einen Weg von  $e_i$  nach  $e_{i+1}$  geben. Auf diesem Weg kann aber keine andere Ecke liegen, diese müsste nämlich eine Sortierungsnummer zwischen  $t + 1$  und  $t$  haben. Dies zeigt, dass  $e_i$  ein direkter Vorgänger von  $e_{i+1}$  ist.

Diese Aussagen führen unmittelbar zu einem Algorithmus mit Laufzeit  $O(n + m)$ . Dazu beachte man, dass die Erstellung des Strukturgraphen, die Bestimmung der topologischen Sortierung und die Überprüfung der angegebenen Bedingung mit linearem Aufwand durchgeführt werden kann.

29. (a) Man bestimme eine topologische Sortierung von  $G$  und führe folgenden Algorithmus zur Bestimmung der Menge  $H$  aus.

```

H := ∅;
E' := G.E;
while E' ≠ ∅ do
    Wähle e aus E' mit der größten Sortierungsnummer und füge e in H ein;
    Entferne e und alle Vorgänger von e in G aus E';

```

Aus der Konstruktion ergibt sich sofort, dass  $H$  eine unabhängige Menge ist.

- (b) Es sei  $s > 0$  und  $G$  ein gerichteter Graph mit  $2s + 1$  Ecken, der genau aus einem geschlossenen Weg besteht. Für jede unabhängige Menge  $H$  von  $G$  gilt  $|H| \leq s$  bzw.  $|E \setminus H| \geq s + 1$ . Da jede Ecke genau einen Nachfolger und einen Vorgänger hat, kann nicht jede Ecke aus  $E \setminus H$  einen Nachfolger in  $H$  haben.



# Kapitel 5 – Entwurfsmethoden für die algorithmische Graphentheorie

1. Es muss nur gezeigt werden, dass die ausgewählten Kanten nicht mehrere geschlossene Wege bilden. Angenommen es entstehen zwei geschlossene Wege  $W_1$  und  $W_2$ . Es sei  $S$  die Menge der Ecken auf  $W_1 \cup W_2$ . Dann bestehen  $W_1$  und  $W_2$  aus  $|S|$  Kanten. Dies widerspricht der dritten Nebenbedingung.
2.
  - (a) Es sei  $I$  eine maximale unabhängige Menge von  $G$ . Ist  $e \notin I$ , so ist  $I$  eine maximale unabhängige Menge von  $G_{E \setminus \{e\}}$ . Ist  $e \in I$ , so ist  $I \setminus \{e\}$  eine unabhängige Menge von  $G_{E \setminus N[e]}$ . Wäre  $I \setminus \{e\}$  keine maximale unabhängige Menge von  $G_{E \setminus N[e]}$ , dann gäbe es eine unabhängige Menge  $I'$  von  $G_{E \setminus N[e]}$  mit  $|I'| > |I| - 1$ . Somit wäre auch  $I' \cup \{e\}$  eine unabhängige Menge mit mehr als  $|I| + 1$  Ecken. Hieraus folgt die Behauptung.
  - (b) Es genügt, eine maximale unabhängige Menge für jede Zusammenhangskomponente zu bestimmen. Ist  $\Delta(G) \leq 2$ , so sind die Zusammenhangskomponenten von  $G$  isolierte Ecken oder vom Typ  $P_s$  oder  $C_s$ . In jedem dieser Fälle lässt sich eine maximale unabhängige Menge in linearer Zeit bestimmen.
  - (c) Die Korrektheit folgt direkt aus Teil (a).
  - (d) Bezeichne mit  $T(n)$  die Anzahl der Schritte, die die Funktion unabhängig für Graphen mit  $n$  Ecken benötigt. Dann gibt es eine Konstante  $C > 0$ , sodass für  $n > 4$  wegen  $\Delta(G) \geq 3$  folgende Beziehung gilt:
 
$$T(n) \leq T(n-1) + T(n - (\Delta(G) + 1)) + Cn \leq T(n-1) + T(n-4) + Cn.$$
 Schätzt man  $T(n)$  durch  $\lambda a^n$  mit  $a > 1$  ab und wählt  $a$ , sodass
 
$$a^n \approx a^{n-1} + a^{n-4} + o(1)$$
 erfüllt ist, dann ist folgende Ungleichung zu lösen:
 
$$a^4 \geq a^3 + 1 + \epsilon.$$
 Der Wert  $a \approx 1,39$  erfüllt diese Ungleichung. Somit ist  $O(1,39^n)$  der Aufwand der Funktion unabhängig.
3.
  - (a) Es sei  $k$  eine beliebige Kante des Graphen. Die Menge  $R$  der Rundreisen kann in zwei Teilmengen aufgeteilt werden:  $R_1$  enthält die Rundreisen, die  $k$  verwenden, und  $R_2$  die Rundreisen ohne die Kante  $k$ . Nun werden zwei neue Graphen  $G_1$  und  $G_2$  gebildet. Für Graph  $G_1$  werden die Enden von  $k$  in  $G$  zu einer Ecke verschmolzen. Für Graph  $G_2$  wird Kante  $k$  aus  $G$  entfernt. Das Problem des Handlungsreisenden wird nun für  $G_1$  und  $G_2$  getrennt gelöst.
  - (b) Jede Rundreise verwendet für jede Ecke  $e$  genau zwei zu  $e$  inzidente Kanten. Somit ist der Beitrag, welchen die zu  $e$  inzidenten Kanten der Rundreise zur Gesamtlänge beitragen, mindestens so hoch wie die Summe der Längen der beiden kürzesten zu  $e$  inzidenten Kanten. Nachdem die Länge  $l$  einer ersten Rundreise bekannt ist, werden nur noch Rundreisen kürzerer Länge gesucht. Deshalb müssen Graphen, bei denen die untere Grenze für eine Rundreise über  $l$  liegt, nicht betrachtet werden.
4. Für  $|S| = 1$  besteht der minimale Steinerbaum genau aus einer Ecke. In diesem Fall gibt es keine Menge  $U$ , welche die Anforderungen der Nebenbedingungen erfüllt. Somit ist  $x_k = 0$  für alle  $k \in K$  eine Lösung des ILP-Problems, diese entspricht dem leeren Baum.

Sei nun  $|S| > 1$ . Für eine Lösung des ILP-Problems sei  $T_S$  der von den Kanten  $k$  mit  $x_k = 1$  gebildete Graph. Für  $s \in S$  muss  $\beta(\{s\}) \geq 1$  sein. Somit ist jede Ecke von  $S$  eine Ecke von  $T_S$ . Jede Zusammenhangskomponente von  $T_S$  muss mindestens eine Ecke von  $S$  enthalten, sonst würde die Zielfunktion für die Lösung keinen minimalen Wert annehmen. Angenommen  $T_S$  ist nicht zusammenhängend. Es sei  $U$  die Menge der Ecken einer Zusammenhangskomponente. Dann ist  $\beta(U) \geq 1$ , d. h., es gibt eine Ecke außerhalb von  $U$ , welche durch eine Kante  $k$  mit  $x_k = 1$  mit einer Ecke von  $U$  verbunden ist. Dieser Widerspruch zeigt, dass  $T_S$  zusammenhängend ist. Angenommen  $T_S$  enthält einen geschlossenen Weg. Es sei  $k$  eine beliebige Kante dieses Weges. Dann könnte  $x_k$  auf den Wert 0 gesetzt werden und es wäre immer noch eine Lösung des ILP-Problems. Dies zeigt, dass  $T_S$  ein Steinerbaum für  $S$  ist. Da ein minimaler Steinerbaum für  $S$  eine Lösung des ILP-Problems ist, ist der Beweis vollständig.

5. Der angegebene Algorithmus ist ein Greedy-Algorithmus. Eine Implementierung mit Aufwand  $O(n + m)$  kann mit den in Abschnitt 5.2 vorgestellten Datenstrukturen erreicht werden. Der einzige Unterschied besteht darin, dass die Ecke mit kleinstem Eckengrad entfernt wird, hierzu wird ein Zeiger auf das Ende der Liste EckengradListe verwaltet. Ferner werden noch Zähler für die Anzahl der in  $C$  verbliebenen Kanten und Ecken verwaltet. Mit diesen Zählern kann einfach überprüft werden, ob  $C$  eine Clique ist.
6. Es sei  $e_1, \dots, e_n$  eine Reihenfolge der Ecken. Der Algorithmus bestimmt zuerst alle nicht-erweiterbaren Cliques die  $e_1$  enthalten. Danach die, welche  $e_2$  und nicht  $e_1$  enthalten (diese sind in  $P = N(e_2) \setminus \{e_1\}$  enthalten). Allgemein bestimmt ein Aufruf die nicht-erweiterbaren Cliques welche  $e_i$  aber nicht  $e_1, \dots, e_{i-1}$  enthalten.

Für jeden Aufruf  $\text{bronKerbosch}(P, R, X)$  gilt, dass jede Ecke  $e \in R$  zu allen Ecken aus  $P \cup X$  benachbart ist. Dies gilt trivialerweise für den initialen Aufruf der Prozedur  $\text{bronKerbosch}(G, E, \emptyset, \emptyset)$ . Da in jedem folgenden Aufruf  $R$  durch  $R \cup \{e\}$  mit  $e \in P$ ,  $P$  durch  $P \cap N(e)$  und  $X$  durch  $X \cup N(e)$  ersetzt wird, gilt diese Aussage zu jedem Zeitpunkt. Da immer nur Ecken aus  $P$  in  $R$  eingefügt werden, folgt daraus, dass der von  $R$  induzierte Graph immer eine Clique ist. Aus dem gleichen Grund ist jede Ecke, die zu allen Ecken in  $R$  benachbart ist, in  $P \cup X$  enthalten. Man beachte, dass in der Schleife nur Ecken von  $P$  nach  $X$  verschoben werden. Hieraus folgt, dass  $R$  genau dann eine nicht-erweiterbare Clique ist, wenn  $P \cup X = \emptyset$ . Da der Algorithmus gemäß der Backtracking Methode den gesamten Suchbaum durchläuft, werden alle nicht-erweiterbaren Cliques gefunden.

7. Betrachtet der Algorithmus für den folgenden Graph zuerst Ecke  $e_3$ , dann verbleiben noch die drei Ecken  $e_1, e_5, e_6$  mit Grad 2. Somit besteht die berechnete unabhängige Menge aus zwei Ecken. Wird hingegen zuerst Ecke  $e_4$  betrachtet, so bleiben die Ecken  $e_1, e_2, e_6$  über. In diesem Fall wird die Menge  $e_4, e_6, e_2$  als unabhängige Menge mit drei Ecken bestimmt.

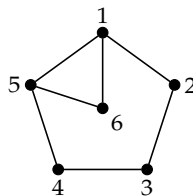

8. Gehört  $e$  zu einer unabhängigen Menge von  $B_e$  mit Gewicht  $\text{OPT}(e)$  so ist

$$\text{OPT}(e) = w(e) + \sum_{e' \in N^{++}(e)} \text{OPT}(e').$$

Andernfalls gilt  $\text{OPT}(e) = \sum_{e' \in N^+(e)} \text{OPT}(e')$ . Hieraus ergibt sich die angegebene Gleichung.



Ein Algorithmus auf Basis der dynamischen Programmierung verwaltet für jede Ecke  $e$  von  $B$  zwei Variablen  $e.o$  und  $e.w$  mit folgenden Werten:

- $e.o = \text{OPT}(e)$ ,
- $e.w = \sum_{e' \in N^+(e)} \text{OPT}(e')$ .

Initial sind alle Werte gleich 0. Der Baum wird gemäß der Tiefensuche durchlaufen. Immer wenn ein Knoten endgültig verlassen wird, wird zuerst  $e.w$  und anschließend  $e.o$  gemäß folgender Gleichung bestimmt:

$$e.o = \max \left( \sum_{e' \in N^+(e)} e'.o, w(e) + \sum_{e' \in N^+(e)} e'.w \right).$$

Der Zeitaufwand ist  $O(\sum_{e \in B} |N^+(e)|) = O(n)$ . Der Speicheraufwand ist ebenfalls linear.

9. Für jede Kante  $(e, f)$  von  $G$  wird eine Variable  $y_{e,f}$  und für jede Ecke  $e$  wird eine Variable  $x_e$  eingeführt. Die zu maximierende Zielfunktion lautet

$$\sum_{(e,f) \in K} y_{e,f}.$$

Die Nebenbedingungen sind

$$\begin{aligned} y_{e,f} &\leq x_e + y_e \text{ für alle } (e, f) \in K; \\ y_{e,f} &\leq 2 - x_e - y_e \text{ für alle } (e, f) \in K; \\ x_e, y_{e,f} &\in \{0, 1\} \text{ für alle } (e, f) \in K \text{ und alle } e \in E. \end{aligned}$$

Die Nebenbedingungen stellen sicher, dass  $y_{e,f} = 1$  genau dann gilt, wenn  $x_e \neq x_f$  ist. Somit bilden die Kanten mit  $y_{e,f} = 1$  einen Schnitt. Hieraus folgt, dass eine optimale Lösung des ILP einen maximalen Schnitt definiert. Ein maximaler Schnitt führt zu einer optimalen Lösung des ILP-Problems.



# Kapitel 6 – Färbung von Graphen

1. Die chromatische Zahl der vier Graphen ist 2, 3, 4 und 3.

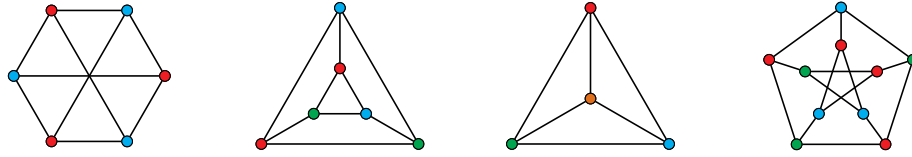

2. Es gilt  $\Delta(G_n) = n - 1$ ,  $\chi(G_n) = n - 2$  und  $\omega(G_n) = n - 3$ .
3. Angenommen es gibt in  $G$  ein Paar  $\{e, e'\}$  von nicht benachbarten Ecken. Dann kann jede Färbung von  $G \setminus \{e, e'\}$  mit  $\chi(G) - 2$  Farben zu einer Färbung von  $G$  mit  $\chi(G) - 1$  Farben erweitert werden ( $e$  und  $e'$  werden mit einer noch nicht verwendeten Farbe gefärbt). Dieser Widerspruch zeigt, dass alle Ecken von  $G$  paarweise benachbart sind, d. h.,  $G$  ist vollständig.
4. Es gilt  $\chi(L_{z,s}) = 2$  (man färbe die Ecken wie ein Schachbrett) und  $\omega(L_{z,s}) = 2$ .
5. Man unterteile die Ecken von  $Q_s$  in zwei Teilmengen, je nachdem ob die Anzahl der Einsen gerade oder ungerade ist. Da die beiden Mengen unabhängige Mengen sind, ist  $\chi(Q_s) = 2$ . Da  $Q_s$  keine Dreiecke enthält, ist  $\omega(Q_s) = 2$ .
6. Es sei  $B$  ein beliebiger Tiefensuchebaum von  $G$  der Höhe  $h$ . Es gilt  $h \leq m$ . Die Ecken von  $G$  werden derart gefärbt, sodass die Ecken auf einem Niveau jeweils die gleiche Farbe bekommen. Dazu werden  $h + 1$  Farben verwendet. Da nach den Ergebnissen aus Abschnitt 4.7 eine Kante niemals Ecken aus dem gleichen Niveau verbindet, liegt eine zulässige Färbung vor. Somit gilt  $\chi(G) \leq m + 1$ .
7. Man betrachte den in Abschnitt 4.7.4 definierten Blockbaum  $G_B$  und erzeuge für einen beliebigen Block  $B$  eine minimale Färbung. Danach wird  $G_B$  anhand der Tiefensuche mit Startecke  $B$  durchlaufen. Da  $G_B$  ein Baum ist, ist in jedem neuen Block genau eine Ecke schon gefärbt. Diese wird jeweils zu einer minimalen Färbung erweitert. Hieraus folgt die Behauptung. Färbungsalgorithmen können diese Eigenschaft nutzen und zunächst in linearer Zeit die Blöcke bestimmen und danach wie beschrieben weiter verfahren. Der Vorteil liegt darin, dass gegebenenfalls kleinere Graphen gefärbt werden müssen.
8. Es sei  $A$  die Menge der Ecken von  $G$ , deren Grad mindestens  $\chi(G) - 1$  ist. Angenommen es gilt  $|A| \leq \chi(G) - 1$ . Dann färbe man die Ecken von  $G$  mit dem Greedy-Algorithmus, wobei zuerst die Ecken aus  $A$  betrachtet werden. Hierfür werden maximal  $\chi(G) - 1$  Farben verwendet. Da die restlichen Ecken maximal den Eckengrad  $\chi(G) - 2$  haben, vergibt der Greedy-Algorithmus insgesamt höchstens  $\chi(G) - 1$  Farben. Dieser Widerspruch beweist  $|A| \geq \chi(G)$ .
9. Es sei  $e$  eine beliebige Ecke von  $G$ . Dann ist nach Voraussetzung  $N(e)$  eine unabhängige Menge von  $G$ . Also gilt  $\alpha(G) \geq \Delta(G)$ . Somit folgt

$$(\alpha(G) + 1)^2 > \alpha(G)(\alpha(G) + 1) \geq \alpha(G)(\Delta(G) + 1) \geq \alpha(G)\chi(G) \geq n.$$

Dies beweist die Behauptung.

10. Da es zwischen den Ecken einer unabhängigen Menge keine Kanten gibt, gilt

$$m \leq n(n - 1)/2 - \alpha(G)(\alpha(G) - 1)/2 = (n^2 - \alpha(G)^2 - (n - \alpha(G)))/2$$

bzw.  $2m \leq n^2 - \alpha(G)^2$ . Hieraus folgt die Behauptung. Gilt  $\alpha(G) = \sqrt{n^2 - 2m}$ , so folgt aus obiger Ungleichung, dass  $\alpha(G) = n$  gilt. Da  $G$  zusammenhängend ist, besteht  $G$  in diesem Fall nur aus einer Ecke.

11. (a) Für jede Ecke  $e$  gilt  $\chi(G \setminus \{e\}) \geq \chi(G) - 1$ . Da nach Voraussetzung  $\chi(G \setminus \{e\}) < \chi(G)$  für jede Ecke gilt, muss  $\chi(G \setminus \{e\}) = \chi(G) - 1$  sein.

(b) Kritisch sind  $C_2$  und  $C_n$  mit ungeradem  $n > 1$ .

(c) Kritische Graphen sind offensichtlich zusammenhängend. Ist  $G$  ein 2-kritischer Graph, so hat  $G \setminus \{e\}$  keine Kanten. Daraus folgt  $G = C_2$ . Ein 3-kritischer Graph  $G$  ist nicht bipartit und enthält somit einen geschlossenen Weg  $W$  ungerader Länge. Alle Ecken von  $G$  müssen auf  $W$  liegen. Gäbe es Kanten, welche nicht auf  $W$  liegen, so würde es eine Ecke  $e$  geben, so dass  $G \setminus \{e\}$  immer noch einen geschlossenen Weg ungerader Länge enthält. Da  $\chi(G \setminus \{e\}) = 2$  ist, kann dies nicht sein. Somit ist  $G$  vom Typ  $C_{2i+1}$  mit  $i \geq 1$ .

(d) Es sei  $G$  ein kritischer Graph und  $B_i$  die Blöcke von  $G$ . Nach Aufgabe 7 gilt:

$$\chi(G) = \max \{ \chi(B_i) \mid i = 1, \dots, s \}.$$

Angenommen es ist  $s > 1$ . Ohne Einschränkung kann man annehmen, dass  $\chi(G) = \chi(B_1)$  ist. Dann gibt es eine Ecke  $e$  in  $B_2 \setminus B_1$ . Somit ist  $\chi(G \setminus \{e\}) = \chi(B_1) = \chi(G)$ . Dieser Widerspruch zeigt, dass  $s = 1$  gilt, d. h.,  $G$  ist zweifach zusammenhängend.

(e) Es sei  $e$  eine Ecke mit  $g(e) = \delta(G)$  und  $G' = G - \{e\}$ . Dann ist  $\chi(G') = c - 1$ . Bezeichne mit  $F_1, \dots, F_{c-1}$  die Farbklassen einer minimalen Färbung von  $G'$ . Wäre  $\delta(G) < c - 1$ , dann würde es eine Farbklass  $F_j$  geben, sodass  $e$  zu keiner Ecke aus  $F_j$  benachbart ist. Eine Färbung von  $e$  mit der zu  $F_j$  gehörenden Farbe würde nun zu einer  $c - 1$ -Färbung von  $G$  führen. Dieser Widerspruch zeigt, dass  $\delta(G) \geq c - 1$  ist.

(f) Der Graph ist 4-kritisch.

12. Analog zur Lösung von Aufgabe 11 (e) in diesem Kapitel. Man beachte, dass  $G'$  weniger Kanten als  $G$  hat und somit  $\chi(G') \leq c - 1$  gilt.

13. Für eine minimale Färbung muss es zu jedem Paar von Farben eine Kante geben, welche Ecken mit dieser Farbe verbindet. Somit gilt:  $\chi(G)(\chi(G) - 1)/2 \leq m$  bzw.  $(\chi(G) - 1/2)^2 \leq 2m + 1/4$ . Hieraus folgt die erste Ungleichung. Gleichheit gilt für vollständige Graphen.

Als nächstes wird die Ungleichung  $2\sqrt{n} \leq \chi(G) + \chi(\overline{G})$  betrachtet. Es seien  $f_1$  bzw.  $f_2$  minimale Färbungen von  $G$  bzw.  $\overline{G}$ . Ordne jeder Ecke  $e$  aus  $G$  das Paar  $(f_1(e), f_2(e))$  zu. Angenommen es gibt zwei Ecken  $e' \neq e''$ , welche das gleiche Paar zugeordnet bekommen. Dann ist  $f_1(e') = f_1(e'')$  und  $f_2(e') = f_2(e'')$ . Somit können  $e'$  und  $e''$  weder in  $G$  noch in  $\overline{G}$  benachbart sein. Dieser Widerspruch beweist, dass  $n \leq \chi(G)\chi(\overline{G})$  gilt. Hieraus folgt

$$4n \leq 4\chi(G)\chi(\overline{G}) \leq (\chi(G) + \chi(\overline{G}))^2$$

und somit  $2\sqrt{n} \leq \chi(G) + \chi(\overline{G})$ . Für  $C_4$  gilt  $\chi(C_4) + \chi(\overline{C_4}) = 4 = 2\sqrt{4}$  und für  $K_{s,s}$  mit  $s > 2$  gilt  $\chi(K_{s,s}) + \chi(\overline{K_{s,s}}) = 2 + s > 2\sqrt{2s} = 2\sqrt{n}$ .

Der Beweis der Ungleichung  $\chi(G) + \chi(\overline{G}) \leq n + 1$  wird durch vollständige Induktion nach  $n$  geführt. Für  $n = 2$  ist die Aussage wahr. Sei nun  $n > 2$ ,  $e$  eine Ecke von  $G$  und  $G_e = G \setminus \{e\}$ . Dann gilt  $\chi(G_e) + 1 \geq \chi(G)$  und  $\chi(\overline{G_e}) + 1 \geq \chi(\overline{G})$ . Nach Induktionsvoraussetzung ist  $\chi(G_e) + \chi(\overline{G_e}) \leq n$ . Gilt sogar  $\chi(G_e) + \chi(\overline{G_e}) < n$ , so folgt die Aussage direkt. Somit bleibt noch der Fall  $\chi(G_e) + \chi(\overline{G_e}) = n$ . Ist  $g(e) < \chi(G_e)$ , so folgt  $\chi(G) = \chi(G_e)$  und hieraus ergibt sich  $\chi(G) + \chi(\overline{G}) \leq n + 1$ . Ist  $g(e) \geq \chi(G_e)$ , so gilt

$$\overline{g}(e) = n - 1 - g(e) \leq n - 1 - \chi(G_e) = n - 1 - (n - \chi(\overline{G_e})) = \chi(\overline{G_e}) - 1$$

und somit  $\bar{g}(e) < \chi(\overline{G_e})$ . Also ist  $\chi(\overline{G}) = \chi(\overline{G_e})$ , woraus die Aussage folgt.

Für die Graphen  $K_{s,s}$  gilt  $\chi(K_{s,s}) + \chi(\overline{K_{s,s}}) = 2 + s < 2s + 1 = n + 1$  und für die Graphen  $K_n$  gilt  $\chi(K_n) + \chi(\overline{K_n}) = n + 1$ .

14. Es gilt  $\chi(R_n) = 1 + \chi(C_n)$  für alle  $n \geq 3$ . Somit ist  $\chi(R_{2n}) = 3$  und  $\chi(R_{2n+1}) = 4$ .
15. Da  $I_5$  vollständig ist, gilt  $\chi(I_5) = 5$ . Für  $n \geq 6$  gilt nach dem Satz von Brooks  $\chi(I_n) \leq 4$  (siehe Seite 175). Da  $I_n$  einen geschlossenen Weg der Länge drei enthält ist  $\chi(I_n) \geq 3$ . Ist  $n \equiv 0(3)$ , so können die Ecken im Uhrzeigersinn mit den Farben 1, 2, 3, 1, 2, 3, ... gefärbt werden. Somit ist  $\chi(I_{3n}) = 3$  für  $n \geq 2$ . Ist  $n \not\equiv 0(3)$ , so legen die Farben von zwei auf  $C_n$  benachbarten Ecken eine Färbung fest. In diesem Fall sind drei Farben nicht ausreichend, d. h., die chromatische Zahl ist 4.
16. Der Beweis wird durch vollständige Induktion nach  $s$  geführt. Für  $s = 3$  ist die Aussage wahr. Sei nun  $s > 3$ . Es ist zu zeigen, dass  $G_s$  keinen geschlossenen Weg der Länge drei enthält. Dazu beachte man zunächst, dass der von den neuen Ecken induzierte Untergraph diese Eigenschaft hat. Nach Induktionsvoraussetzung und Konstruktion bilden die Nachbarn der Ecken von  $G_{s-1}$  in  $G_s$  jeweils eine unabhängige Menge. Somit ist  $\omega(G_s) = 2$ . Eine minimale Färbung von  $G_{s-1}$  kann zu einer Färbung von  $G_s$  erweitert werden, indem die Ecke  $e'$  die gleiche Farbe wie  $e$  und die zusätzliche Ecke  $e''$  eine neue Farbe bekommt. Somit gilt  $\chi(G_s) \leq s$  nach Induktionsvoraussetzung. Angenommen es gibt eine Färbung von  $G_s$ , welche nur  $s - 1$  Farben verwendet. Da Ecke  $e''$  zu jeder neuen Ecke benachbart ist, ist keine dieser Ecken mit der gleichen Farbe gefärbt. Nun kann für den Untergraphen  $G_{s-1}$  von  $G_s$  eine Färbung mit  $s - 2$  Farben erzeugt werden. Dazu bekommt jede Ecke  $e$  die Farbe von  $e'$ . Dies widerspricht der Induktionsvoraussetzung und somit ist  $\chi(G_s) = s$ .
17. Es werden maximal zwei weitere Farben benötigt. Man wende die Breitensuche auf  $B$  an und färbe die noch nicht gefärbten Ecken in ungeraden Niveaus mit der Farbe 2 und die in geraden Niveaus mit der Farbe 3.
18. Es wird ein Graph gebildet, in dem jede Radiostation einer Ecke entspricht und zwei Ecken verbunden sind, wenn die Entfernung der zugehörigen Stationen unter dem vorgegebenen Wert liegt. Radiostationen, welche in einer festen minimalen Färbung dieses Graphen die gleiche Farbe haben, können die gleiche Sendefrequenz benutzen.
19. Nein. Die Prozedur stützt sich bei der Färbung einer Ecke  $e$  mit  $g(e) < 5$  wesentlich auf die Planarität des Graphen. Der Graph  $K_6$  erfüllt die angegebene Bedingung, aber es gilt  $\chi(K_6) > 5$ .
20. Es sei  $G$  ein ungerichteter Graph, sodass  $G$  und  $\overline{G}$  planar sind. Bezeichne die Anzahl der Kanten von  $G$  mit  $m$  und die von  $\overline{G}$  mit  $\overline{m}$ . Dann gilt nach den Ergebnissen aus Abschnitt 6.5:  $n(n-1)/2 = m + \overline{m} \leq 2(3n-6)$ . Hieraus folgt  $n(n-1)/(n-2) \leq 12$ . Diese Ungleichung ist für  $n > 10$  nicht erfüllt.
21. Es sei  $s$  die Anzahl der Farbklassen in einer nicht trivialen Färbung, welche genau eine Ecke enthalten. Diese bilden eine Clique. Somit ist  $s \leq \chi(G)$ . Da die restlichen Farbklassen mindestens zwei Farben enthalten, gilt  $\chi_n(G) \leq s + (n-s)/2 \leq (n+\chi(G))/2$  bzw.  $2(n-\chi_n(G)) \geq (n-\chi(G))$ . Hieraus folgt die Behauptung. Der Greedy-Algorithmus erzeugt eine nicht triviale Färbung.
22. Es genügt folgende Aussage zu beweisen: Für jede Ecke  $e_i$  gilt:  $h(e_i) + f(e_i) \leq h + 1$ . Hierbei bezeichnet  $f(e_i)$  die vom Greedy-Algorithmus vergebene Farbnummer und  $h(e_i)$  die Höhe der Ecke  $e_i$ . Der Beweis erfolgt durch vollständige Induktion nach der Farbnummer. Für Ecken  $e_i$  mit  $f(e_i) = 1$  ist die Aussage klar. Sei nun  $e_i$  eine Ecke mit  $f(e_i) > 1$ . Da  $e_i$  nicht mit der Farbnummer

$f(e_i) - 1$  gefärbt wurde, muss es einen Nachbarn  $e_j$  von  $e_i$  mit  $j < i$  und  $f(e_j) = f(e_i) - 1$  geben. Dann folgt  $h(e_j) \geq h(e_i) + 1$ . Nach Induktionsvoraussetzung gilt nun:

$$h + 1 \geq h(e_j) + f(e_j) \geq h(e_i) + 1 + f(e_i) - 1 = h(e_i) + f(e_i).$$

23. Für  $\omega(G) = \Delta(G) + 1$  ist die Vermutung für jeden Wert von  $\epsilon$  korrekt. Ist  $\omega(G) < \Delta(G) + 1$  dann ist der gesuchte Wert von  $\epsilon$  nach oben beschränkt:

$$\epsilon \leq \frac{\Delta(G) + 1 - \chi(G)}{\Delta(G) + 1 - \omega(G)}.$$

Es sei  $G_k$  das Komplement des Graphen bestehend aus  $k$  Kopien von  $C_5$ . Dann gilt  $\omega(G_k) = 2k$ ,  $\chi(G_k) = 3k$  und  $\Delta(G_k) = 2 + 5(k - 1)$  und damit  $\epsilon \leq (2k - 2)/(3k - 2) < 2/3$ .

24. Der Graph  $G_S$  wird nicht explizit abgespeichert. Die Nachbarschaftsrelation wird durch die Funktion `nachbar` implementiert. In dem Feld `aufteilung` der Länge 81 werden die vergebenen Ziffern abgespeichert. Die vorgegebenen Ziffern werden in dem Feld `vorgabe` der gleichen Länge abgespeichert. Nicht belegte Zellen des Gitters werden mit 0 initialisiert. Durch die Vorgabe einiger Ziffern müssen auch für die erste Ecke alle Ziffern durchprobiert werden. Deshalb lautet der initiale Aufruf `partition(-1)`. Vor diesem Aufruf wird das Feld `aufteilung` mit den Werten des Feldes `vorgabe` initialisiert. Folgende Änderungen gegenüber dem in Kapitel 5 vorgegebenen Code müssen umgesetzt werden:

- (a) Vorgegebene Ziffern dürfen nicht geändert werden. Die Funktion `partition` muss dazu erweitert werden.
- (b) Für alle nicht vorgegebenen Zellen müssen alle Ziffern durchprobiert werden, d. h., die Verwendung des Feldes `maximum` entfällt.
- (c) Bei der Überprüfung einer Teillösung müssen immer alle vorbelegten Ziffern mitberücksichtigt werden. Dazu muss die Funktion `korrekteTeillösung` erweitert werden.

```
const DIM = 9;
var aufteilung : Array[0..DIM*DIM] von Integer;
var vorgabe : Array[0..DIM*DIM] von Integer;

function partition(i : Integer) : Boolean
  while vorgabe[i+1] != 0 and i <= DIM*DIM-1 do
    i := i+1;
  if erweitereTeillösung(i) then
    do
      if korrekteTeillösung(i+1) then
        if i+1 = DIM*DIM-1 then
          return true;
        if partition(i+1)
          return true;
      while variiereTeillösung(i+1);
    return false;

function erweitereTeillösung(i : Integer) : Boolean
  if i = DIM*DIM-1 then
    return false;
  else
    aufteilung[i+1] := 1;
    return true;

function variiereTeillösung(i : Integer) : Boolean
  if aufteilung[i] >= DIM then
```

```

    return false;
else
    aufteilung[i] := aufteilung[i] + 1;
    return true;

function nachbar(i : Integer, j : Integer) : Boolean;
var i1, i2, j1, j2 : Integer;

if i = j then
    return false;
i2 := i mod DIM; i1 := (i - i2) / DIM;
j2 := j mod DIM; j1 := (j - j2) / DIM;
if i1 = j1 or i2 = j2 then
    return true;
if i1/3 = j1/3 and i2/3 = j2/3 then
    return true;
return false;

function korrekteTeillösung(i : Integer) : Boolean
for j := 0 to i - 1 do
    if aufteilung[j] = aufteilung[i] and nachbar(i, j) then
        return false;
for j := 0 to DIM * DIM - 1 do
    if vorgabe[j] = aufteilung[i] and nachbar(i, j) then
        return false;
return true;

```

Gibt der Aufruf von `partition(-1)` den Wert **false** zurück, dann hat das Sudoku keine Lösung. Andernfalls steht in dem Feld `aufteilung` die zuerst gefundene Lösung.

25. Die kantenchromatischen Zahlen der vier Graphen aus Aufgabe 1 sind von links nach rechts 3, 3, 3 und 4. Für die Graphen  $I_n$  gilt:  $\chi'(I_{2n+1}) = 5$  und  $\chi'(I_{2n}) = 4$ . Für die Graphen  $R_n$  gilt:  $\chi'(R_n) = n$ .
26. Das Problem kann als Kantenfärbungsproblem formuliert werden. Jede Mannschaft entspricht einer Ecke in einem vollständigen Graphen. Die Anzahl der Farben in einer minimalen Kantenfärbung entspricht der Anzahl der Tage des Wettbewerbs. Die Kanten mit gleicher Farbe entsprechen den Partien eines Spieltages. Um die minimale Dauer des Wettbewerbs zu bestimmen, muss  $\chi'(K_n)$  bestimmt werden.

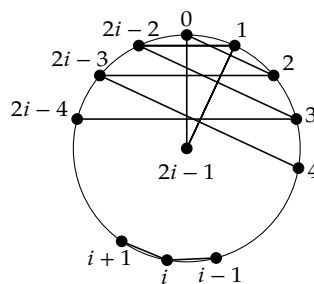

Zunächst wird gezeigt, dass  $\chi'(K_{2i}) = 2i - 1$  ist. Dazu werden die Ecken von  $K_{2i}$  mit den Zahlen  $\{0, \dots, 2i - 1\}$  nummeriert und eine graphische Darstellung von  $K_{2i}$  betrachtet, bei der die Ecken  $\{0, \dots, 2i - 2\}$  gleichmäßig auf einem Kreis angeordnet sind und die Ecke  $2i - 1$  im Mittelpunkt liegt. Folgende Kanten können mit Farbe 1 gefärbt werden:  $(2i - 1, 0)$ ,  $(1, 2i - 2)$ ,  $(2, 2i - 3)$ ,  $\dots$ ,  $(i - 1, i)$ . In der graphischen Darstellung sieht man, dass alle Kanten bis auf die erste parallel sind und somit keine gemeinsame Ecke haben. Eine neue Farbklasse bekommt man, indem man zu jeder

Ecke jeder Kante, ausgenommen der ersten Ecke der ersten Kante, 1 modulo  $2i - 1$  addiert. Die neue Farbklassse besteht aus den Kanten

$$(2i - 1, 1), (2, 0), (3, 2i - 2), \dots, (i, i + 1)$$

und ist durch fette Kanten dargestellt. Man erhält diese Kanten, indem man die Kanten der ersten Farbklassse um den Mittelpunkt um den Winkel  $2\pi/(2i - 1)$  dreht. Auf diese Art erhält man  $2i - 1$  Farbklassen mit je  $i$  Kanten. Da alle Kanten gefärbt sind und alle Farbklassen die maximale Anzahl von Kanten enthalten, ist  $\chi'(K_{2i}) = 2i - 1$ .

Es bleibt noch  $\chi'(K_{2i+1})$  zu bestimmen. Eine Farbklassse in  $K_{2i+1}$  kann maximal  $i$  Kanten enthalten. Somit ist  $\chi'(K_{2i+1}) \geq 2i + 1$ . Da  $K_{2i+1}$  ein Untergraph von  $K_{2i+2}$  ist, induziert eine Kantenfärbung von  $K_{2i+2}$  mit  $2i + 1$  Farben eine Kantenfärbung mit  $2i + 1$  Farben auf  $K_{2i+1}$ . Somit ist  $\chi'(K_{2i+1}) = 2i + 1$ .

27. Aus den  $n!$  möglichen Reihenfolgen sind die zu bestimmen, die zu einer 2-Färbung führen. Für  $n \leq 4$  wird immer eine 2-Färbung erzeugt. Sei nun  $n \geq 6$ . Bezeichne die Ecken mit ungeraden Nummern mit  $E_1$  und die mit geraden Nummern mit  $E_2$ . Sind die ersten beiden Ecken aus  $E_1$ , so bekommen diese die Farbe 1. Daraufhin kann keine der Ecken aus  $E_2$  die Farbe 1 bekommen. Somit wird in diesem Fall eine 2-Färbung erzeugt. Die gleiche Aussage gilt für  $E_2$ . Dies sind insgesamt  $n(n-2)(n-2)!/2$  verschiedene Reihenfolgen. Sind die ersten beiden Ecken durch eine Kante verbunden und die dritte Ecke entweder aus der gleichen Menge wie die erste Ecke oder mit der ersten Ecke verbunden, so wird ebenfalls eine 2-Färbung erzeugt. Dies sind noch einmal  $n(n-2)(n-3)(n-3)!/2$  verschiedene Reihenfolgen. In allen anderen Fällen bekommen eine Ecke aus  $E_1$  und eine Ecke aus  $E_2$  die gleiche Farbe und dadurch werden mindestens 3 Farben vergeben. Somit ist die Wahrscheinlichkeit, dass der Greedy-Algorithmus eine 2-Färbung erzeugt, gleich

$$\frac{n(n-2)(n-2)! + n(n-2)(n-3)(n-3)!}{2n!} = \frac{2n-5}{2n-2}.$$

Die Wahrscheinlichkeit, dass der Algorithmus für diesen Graphen eine optimale Färbung erzielt, strebt also mit wachsendem  $n$  gegen 1. Für  $n = 20$  liegt diese Wahrscheinlichkeit schon über 92 %. Mit Wahrscheinlichkeit  $2^{n/2}(n/2)!/n!$  erzeugt der Algorithmus eine Färbung mit  $n/2$  Farben. Für  $n = 10$  liegt dieser Wert unter 0,11 %.

28. Die folgende Tabelle zeigt die erzeugten Färbungen. Es ist  $\chi = 3$ .

| Ecke                | $e_1$ | $e_2$ | $e_3$ | $e_4$ | $e_5$ | $e_6$ |
|---------------------|-------|-------|-------|-------|-------|-------|
| Greedy-Algorithmus  | 1     | 2     | 1     | 3     | 2     | 4     |
| Johnson Algorithmus | 1     | 1     | 2     | 2     | 3     | 4     |
| Optimale Färbung    | 1     | 2     | 3     | 3     | 2     | 1     |

29. Mittels vollständiger Induktion nach  $i$  wird gezeigt, dass Ecken aus  $F_{\pi(i)}$  eine Farbe mit der Nummer  $i$  oder kleiner bekommen. Hieraus folgt dann direkt die Behauptung. Die Ecken aus  $F_{\pi(i)}$  haben bezüglich  $f$  alle die gleiche Farbe, d. h., sie sind nicht benachbart. Somit bekommen die Ecken aus  $F_{\pi(1)}$  alle die Farbe 1 zugeordnet. Angenommen eine Ecke  $e$  aus  $F_{\pi(i)}$  bekommt die Farbe  $i + 1$  zugeordnet. Somit muss  $e$  zu einer Ecke  $e'$  mit Farbe  $i$  benachbart sein. Nach Induktionsvoraussetzung kann  $e'$  nicht in  $F_{\pi(1)}, \dots, F_{\pi(i-1)}$  liegen. Also liegen  $e$  und  $e'$  in  $F_{\pi(i)}$ . Dies bedeutet aber, dass  $e$  und  $e'$  nicht benachbart sind. Dieser Widerspruch zeigt die Behauptung.

Wendet man den Greedy-Algorithmus in der angegebenen Reihenfolge auf die Ecken des Graphen aus Aufgabe 28 an, so erhält man eine Färbung mit vier Farben. Ordnet man die Ecken nach absteigenden Farbklassen um, d. h., man betrachtet die Ecken in der Reihenfolge  $e_6, e_4, e_5, e_2, e_3, e_1$ , dann erhält man hingegen eine Färbung mit drei Farben.



Es sei  $G$  ein bipartiter Graph mit Eckenmenge  $E = \{a_1, \dots, a_n\} \cup \{b_1, \dots, b_n\}$  und Kantenmenge  $K = \{(a_i, b_j) \mid 1 \leq i, j \leq n, i \neq j\}$ . Im ungünstigsten Fall ordnet der Greedy-Algorithmus für jedes  $i$  den Ecken  $a_i$  und  $b_i$  die gleiche Farbe zu. Dann vergibt der Algorithmus  $n$  Farben, obwohl 2 ausreichen. In diesem Fall wird für jede Permutation der Farbklassen ebenfalls eine Färbung mit  $n$  Farben erzeugt.

30. (a) Der Greedy-Algorithmus betrachtet bei der Bestimmung der Farbe einer Ecke  $e$  die schon gefärbten Nachbarn und wählt dann die kleinste Farbnummer aus, welche noch nicht für diese Nachbarn verwendet wurde. Zur Färbung der  $i$ -ten Ecke  $e_i$  werden  $\min\{i - 1, g(e_i)\}$  Nachbarn betrachtet, d. h., die Farbnummer von  $e_i$  ist maximal  $\min\{i, g(e_i) + 1\}$ . Eine Obergrenze für die Anzahl der durch den Greedy-Algorithmus vergebenen Farben ist:

$$\max\{\min\{i, g(e_i) + 1\} \mid i = 1, \dots, n\}.$$

- (b) Die Ecken  $\{e_i \mid g(e_i) < k\} \cup \{e_1, \dots, e_k\}$  liegen innerhalb der ersten  $k$  Farbklassen. Es gilt also, diese Menge für festes  $k$  möglichst groß zu machen. Dies erreicht man, indem Ecken mit kleinem Eckengrad über die erste Teilmenge und Ecken mit großem Eckengrad über die zweite Teilmenge abgedeckt werden. Hierzu betrachtet man beispielsweise die Ecken in der Reihenfolge absteigender Eckengrade.
- (c) Alle Ecken von  $H_i$  haben den Grad  $i$ . Betrachtet man die Ecken von  $H_i$  in der Reihenfolge absteigender Eckennummern (d. h.  $2i + 2, 2i + 1, \dots, 1$ ), so vergibt der Greedy-Algorithmus  $i + 1$  Farben.



# Kapitel 7 – Perfekte Graphen

1. Enthält jede Clique von  $G$  weniger als  $\sqrt{n}$  Ecken, so folgt aus dem ersten Lemma aus Abschnitt 7.4.2 auf Seite 212, dass  $\chi(G) < \sqrt{n}$  ist. Somit gilt  $n/\chi(G) > \sqrt{n}$ . Aus dem gleichen Lemma folgt, dass  $G$  eine unabhängige Menge der Größe  $\sqrt{n}$  hat. Somit hat  $\overline{G}$  eine Clique der Größe  $\sqrt{n}$ .
2. Orientiert man jede Kante des Permutationsgraphen in Richtung der höheren Eckennummern, so entsteht eine kreisfreie transitive Orientierung. Die chromatische Zahl des Permutationsgraphen ist  $h + 1$ , wobei  $h$  die maximale Höhe einer Ecke ist. Aus Aufgabe 22 aus Kapitel 6 folgt nun, dass der Greedy-Algorithmus für Permutationsgraphen eine minimale Färbung erzeugt.
3. Definiere eine Permutation  $\rho$  durch  $\rho(i) = \pi(n + 1 - i)$  für  $i = 1, \dots, n$ . Es gilt  $\rho^{-1}(i) = n + 1 - \pi^{-1}(i)$ . Ferner ist  $\pi^{-1}(i) < \pi^{-1}(j)$  genau dann, wenn  $\rho^{-1}(i) > \rho^{-1}(j)$  ist. Somit ist  $G_\rho$  das Komplement von  $G_\pi$ .
4. Im Folgenden ist das Permutationsdiagramm, der Graph und die minimale Färbung dargestellt.

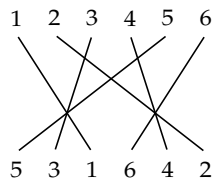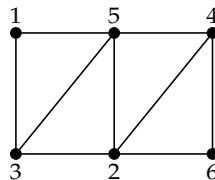

Farbe:

|   |   |   |   |   |   |
|---|---|---|---|---|---|
| 1 | 2 | 3 | 4 | 5 | 6 |
| 2 | 2 | 1 | 1 | 0 | 0 |

5. Eine Ecke  $j$  ist zu  $\pi(1)$  benachbart, wenn  $\pi^{-1}$  die Reihenfolge von  $j$  und  $\pi(1)$  vertauscht. Für  $j \neq \pi(1)$  gilt  $\pi^{-1}(j) > \pi^{-1}(\pi(1)) = 1$ . Somit sind die Ecken  $j = 1, \dots, \pi(1) - 1$  zu  $\pi(1)$  benachbart und es gilt  $g(\pi(1)) = \pi(1) - 1$ . Eine Ecke  $j$  ist zu  $\pi(n)$  benachbart, wenn  $\pi^{-1}$  die Reihenfolge von  $j$  und  $\pi(n)$  vertauscht. Für  $j \neq \pi(n)$  gilt  $\pi^{-1}(j) < \pi^{-1}(\pi(n)) = n$ . Somit sind die Ecken  $j = n, \dots, \pi(1) + 1$  zu  $\pi(n)$  benachbart und es gilt  $g(\pi(n)) = n - \pi(n)$ .
6. Es sei  $I = \{I_1, \dots, I_n\}$  eine Menge von Intervallen der Form  $I_i = [a_i, b_i]$  und  $G$  der zugehörige Intervallgraph. Auf der Menge  $I$  kann eine partielle Ordnung eingeführt werden:  $I_i < I_j$  genau dann, wenn  $I_i \cap I_j = \emptyset$  und  $b_i < a_j$  gilt. Das Komplement  $\overline{G}$  hat die Kantenmenge  $K = \{(I_i, I_j) \mid I_i < I_j \text{ oder } I_i > I_j\}$ . Wird jede Kante in  $K$  in Richtung des größeren Intervalls ausgerichtet, so erhält man eine transitive Orientierung von  $\overline{G}$ .
7. Die Intervalle, welche zu einer Farbklasse einer Färbung des Schnittgraphen gehören, überlappen sich paarweise nicht. Somit kann ein Arbeiter diese Arbeitsaufträge ausführen. Umgekehrt induziert eine Zuordnung von Arbeitern zu den Aufträgen eine Färbung von  $G$ . Somit ist  $\chi(G)$  die minimale Anzahl von Arbeitern zur Ausführung der Aufträge. Auf der Menge der Intervalle wird eine partielle Ordnung definiert:  $I_i < I_j$ , falls  $b_i < a_j$ . Ohne Einschränkung der Allgemeinheit kann man annehmen, dass die Intervalle in der Reihenfolge  $I_1, I_2, \dots$  gefärbt werden. Es seien  $\{I_1, \dots, I_s\}$  die mit Farbe 1 gefärbten Intervalle und  $G'$  der von den restlichen Intervallen induzierte Graph. Im Folgenden wird gezeigt, dass  $\omega(G') < \omega(G)$  gilt. Daraus kann gefolgert werden, dass der Algorithmus maximal  $\omega(G)$  Farben vergibt. Wegen  $\omega(G) \leq \chi(G)$  bestimmt der Algorithmus somit eine minimale Färbung. Angenommen es gilt  $\omega(G') = \omega(G)$ . Dann gibt es in  $G'$  eine Clique  $C$  mit  $\omega(G)$  Intervallen. Es sei  $I_C$  der Schnitt aller Intervalle aus  $C$ . Es ist  $I_C \neq \emptyset$ . Angenommen es gilt  $I_i \cap I_C = \emptyset$  für alle  $i = 1, \dots, s$ . Sei  $j$  maximal mit  $I_j < I_C$  (man beachte, dass  $I_C < I_1$  nicht gelten kann). Somit gibt es in  $C$  ein Intervall  $I$  mit  $I_j < I$  und es ist  $I_C < I_{j+1}$ . Dies steht im Widerspruch zur Wahl von  $I_j$ . Also gibt es ein Intervall  $I \in \{I_1, \dots, I_s\}$  mit  $I \cap I_C \neq \emptyset$ . Da

$C$  eine maximale Clique ist, muss  $I \in C$  sein. Somit liegt  $C$  nicht in  $G'$ . Dieser Widerspruch zeigt  $\omega(G') < \omega(G)$ .

Eine Implementierung mit Aufwand  $O(n \log n)$  erfolgt analog zur Lösung des gewichteten Intervallplanungsproblems.

# Kapitel 8 – Flüsse in Netzwerken

- Es sei  $f$  ein maximaler Fluss auf  $G$  und  $f'$  ein maximaler Fluss auf  $G'$ . Da  $f'$  ein zulässiger Fluss für  $G$  ist, gilt:  $|f| \geq |f'|$ . Es sei  $(X, \bar{X})$  ein  $q$ - $s$ -Schnitt von  $G'$  mit  $|f'| = \kappa_{G'}(X, \bar{X})$ . Da keine Kante aus  $H$  in dem Schnitt  $(X, \bar{X})$  liegt, gilt  $|f'| = \kappa_G(X, \bar{X})$ . Analog zu dem Beweis des Lemmas aus Abschnitt 8.2 auf Seite 230 folgt nun:

$$|f| = f(X, \bar{X}) - f(\bar{X}, X) \leq \kappa_G(X, \bar{X}) = |f'|.$$

Man beachte hierzu die in Abschnitt 8.1 angegebene Definition von  $|f|$ . Hieraus folgt  $|f'| = |f|$ .

- Es sei  $X$  die Menge der vier Ecken auf der linken Seite des Netzwerkes. Dann gilt  $\kappa(X, \bar{X}) = 1 + \lambda + \lambda^2 = 2$ . Somit ist der Fluss, welcher die drei mittleren waagrechten Kanten sättigt, maximal und hat den Wert 2. Wählt man die Erweiterungswege  $W_i$  wie in dem Hinweis angegeben, so ist für  $i > 0$  jeweils eine der drei mittleren Kanten eine Rückwärtskante und die anderen beiden sind Vorwärtskanten. Die Wahl der Rückwärtskante ändert sich dabei zyklisch: jeweils die darüberliegende Kante ist im nächsten Erweiterungsweg die Rückwärtskante. Unter Ausnutzung der im Hinweis angegebenen Beziehung  $\lambda^{i+2} = \lambda^i - \lambda^{i+1}$  folgt, dass die entstehenden Flüsse  $|f_i|$  folgende Werte haben:

$$|f_i| = 1 + \sum_{j=2}^{i+1} \lambda^j = -\lambda + \sum_{j=0}^{i+1} \lambda^j < -\lambda + \lambda + 2 = 2.$$

Ferner gilt  $\lim_{i \rightarrow \infty} |f_i| = 2$ . Fügt man noch eine zusätzliche Kante von  $q$  nach  $s$  mit Kapazität 1 ein, so ist der maximale Fluss dieses Netzwerkes gleich 3. Somit konvergiert die Folge der Flüsse  $f_i$  noch nicht einmal gegen den maximalen Fluss.

- Der Wert von  $f$  ist 11.
  - Die drei rot markierten Kanten bilden einen Erweiterungsweg für  $f$  mit  $f_\Delta = 1$ . Der erhöhte Fluss hat den Wert 12 und ist unten dargestellt.
  - Es sei  $X$  die Menge der Ecken unterhalb der rot gestrichelten Linie. Dann ist  $\kappa(X, \bar{X}) = 12$  und somit ist  $\kappa(X, \bar{X})$  ein Schnitt mit minimaler Kapazität und der erhöhte Fluss ist maximal.
  - Der unten dargestellte Fluss ist maximal und hat den Wert 12.

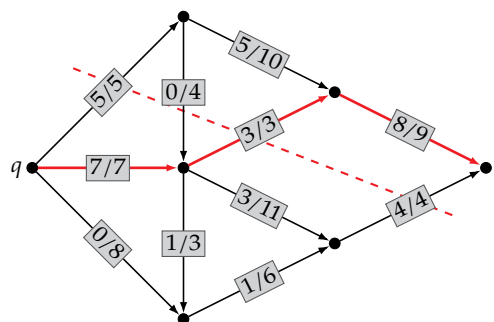

- Das zu dem trivialen Fluss  $f_0$  gehörende geschichtete Hilfsnetzwerk  $G'_{f_0}$  sieht wie folgt aus. Die Bewertungen der Kanten geben den blockierenden Fluss  $f_1$  und die Kapazitäten an.

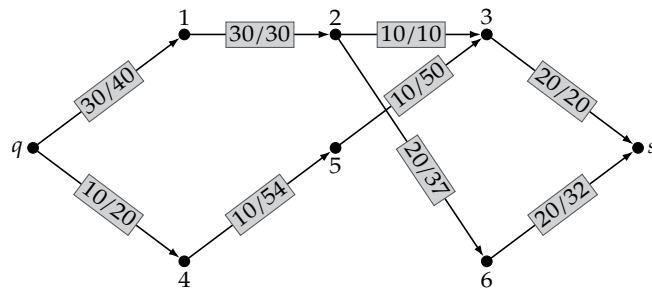

| Ecke      | $q$ | $e_1$ | $e_2$ | $e_3$ | $e_4$ | $e_5$ | $e_6$ | $s$ |
|-----------|-----|-------|-------|-------|-------|-------|-------|-----|
| Durchsatz | 60  | 30    | 30    | 20    | 20    | 50    | 32    | 52  |

Bei der Bestimmung von  $f_1$  hat zunächst Ecke  $e_3$  und danach Ecke  $e_1$  minimalen Durchsatz. Der blockierende Fluss  $f_1$  hat den Wert 40. Das zu  $f_1$  gehörende geschichtete Hilfsnetzwerk  $G'_{f_1}$  sieht wie folgt aus.

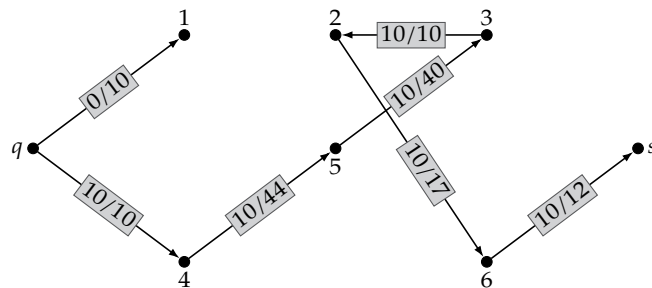

Hieraus ergibt sich ein blockierender Fluss  $f_2$  mit dem Wert 10 und somit ein maximaler Fluss  $f$  mit dem Wert 50. Im Gegensatz zum ursprünglichen Netzwerk wird die Prozedur blockFluss nur zweimal aufgerufen.

5. Die zusätzlichen Kanten müssen eine unbeschränkte Kapazität haben. Der unten dargestellte Fluss hat den Wert 39. Der dargestellte Schnitt besitzt eine minimale Kapazität.

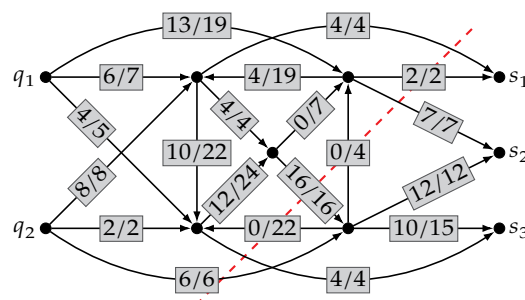

6. Ist  $X_1 \subseteq X_2$  oder  $X_2 \subseteq X_1$ , so ist die Aussage wahr. Im Folgenden wird der Fall betrachtet, dass  $X_1 \not\subseteq X_2 \not\subseteq X_1$  gilt. Dann sind folgende Mengen nicht leer und paarweise disjunkt:

$$A = X_1 \cap X_2, B = \bar{X}_1 \cap X_2, C = X_1 \cap \bar{X}_2, D = \bar{X}_1 \cap \bar{X}_2.$$

Ferner gilt  $q \in A, s \in D, \overline{X_1 \cap X_2} = B \cup C \cup D, D = \overline{X_1 \cup X_2}$  und  $X_1 \cup X_2 = A \cup B \cup C$ . Da

$(X_1, \bar{X}_1)$  und  $(X_2, \bar{X}_2)$  minimale Schnitte sind, gilt:

$$\kappa(X_1, \bar{X}_1) \leq \kappa(A, B \cup C \cup D)$$

$$\kappa(X_1, \bar{X}_1) \leq \kappa(A \cup B \cup C, D)$$

$$\kappa(X_2, \bar{X}_2) \leq \kappa(A, B \cup C \cup D)$$

$$\kappa(X_2, \bar{X}_2) \leq \kappa(A \cup B \cup C, D)$$

Wegen  $X_1 = A \cup C$  und  $\bar{X}_1 = B \cup D$  folgt aus der ersten Ungleichung

$$\kappa(A, B) + \kappa(A, D) + \kappa(C, B) + \kappa(C, D) \leq \kappa(A, B) + \kappa(A, C) + \kappa(A, D)$$

bzw.

$$\kappa(C, B) + \kappa(C, D) \leq \kappa(A, C).$$

Aus den anderen drei Ungleichungen ergibt sich analog:

$$\kappa(A, B) + \kappa(C, B) \leq \kappa(B, D)$$

$$\kappa(B, C) + \kappa(B, D) \leq \kappa(A, B)$$

$$\kappa(A, C) + \kappa(B, C) \leq \kappa(C, D)$$

Addiert man die letzten vier Ungleichungen, so folgt  $\kappa(C, B) = \kappa(B, C) = 0$ , da alle Kapazitäten nicht negativ sind. Setzt man dies in die letzten vier Ungleichungen ein, so ergibt sich  $\kappa(A, B) = \kappa(B, D)$  und  $\kappa(A, C) = \kappa(C, D)$ . Schließlich gilt:

$$\begin{aligned} \kappa(X_1, \bar{X}_1) &= \kappa(A, B) + \kappa(A, D) + \kappa(C, D) \\ &= \kappa(A, B) + \kappa(A, D) + \kappa(A, C) \\ &= \kappa(A, B \cup D \cup C) \\ &= \kappa(X_1 \cap X_2, \bar{X}_1 \cap \bar{X}_2) \end{aligned}$$

und

$$\begin{aligned} \kappa(X_1, \bar{X}_1) &= \kappa(A, B) + \kappa(A, D) + \kappa(C, D) \\ &= \kappa(B, D) + \kappa(A, D) + \kappa(C, D) \\ &= \kappa(B \cup A \cup C, D) \\ &= \kappa(X_1 \cup X_2, \bar{X}_1 \cup \bar{X}_2) \end{aligned}$$

7. Im Folgenden sind die drei konstruierten geschichteten Hilfsnetzwerke und die dazugehörigen blockierenden Flüsse dargestellt. Die letzte Abbildung zeigt den maximalen Fluss mit Wert 9,1.

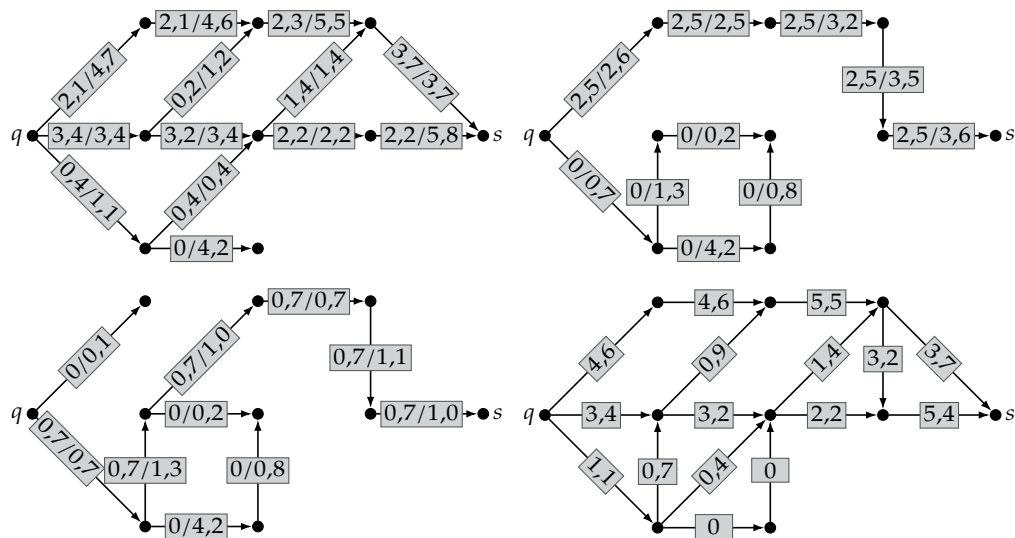

8. Es sei  $f$  ein maximaler Fluss und  $W$  ein Weg von  $q$  nach  $s$  mit  $f(k) > 0$  für alle Kanten  $k$  von  $W$ . Ferner sei  $k_0$  eine Kante von  $W$  mit  $f(k_0) \leq f(k)$  für alle Kanten  $k$  von  $W$ . Man entferne  $k_0$  und setze  $f'(k) = f(k) - f(k_0)$  für alle  $k$  auf  $W$  und ansonsten sei  $f'(k) = f(k)$ . Dieses Verfahren kann maximal  $m$  mal wiederholt werden. Die so entstehenden Wege bilden eine Folge von Erweiterungswegen, die zu einem maximalen Fluss führen. Leider ergibt sich hieraus kein neuer Algorithmus zur Bestimmung eines maximalen Flusses, da ein solcher Fluss schon für die Bestimmung der Wege benötigt wird.
9. Die Prozedur `blockFluss` findet unabhängig vom Wert von  $b$  einen blockierenden Fluss mit Wert 4. Dieser verwendet die beiden oberen Kanten. Ist  $b = 0$ , so ist der blockierende Fluss maximal. Ein maximaler Fluss hat den Wert  $\min\{4 + b, 10\}$ .
10. Enthält ein Netzwerk einen geschlossenen Weg  $W$ , sodass  $|f| < \kappa(k)$  für alle Kanten  $k$  von  $W$  gilt, so gibt es einen maximalen Fluss  $f'$  und eine Kante  $k$  auf  $W$  mit  $f'(k) > |f'| = |f|$ .
11. Der Algorithmus konstruiere die Flüsse  $f_0, f_1, \dots, f_k$ , wobei  $f_0$  der triviale und  $f_k$  ein maximaler Fluss ist. Setze  $\Delta_i = |f_{i+1}| - |f_i|$ . Nach Aufgabe 11 kann mit maximal  $m$  Erweiterungswegen ein maximaler Fluss gefunden werden (mit  $f_i$  startend). Somit gilt  $\Delta_i \geq (|f_{\max}| - |f_i|)/m$ . Hieraus folgt:

$$|f_{\max}| - |f_i| \leq m\Delta_i = m(|f_{i+1}| - |f_i|) = m(|f_{i+1}| - |f_{\max}|) + m(|f_{\max}| - |f_i|).$$

Somit ergibt sich  $|f_{\max}| - |f_{i+1}| \leq (|f_{\max}| - |f_i|)(1 - 1/m)$ . Da  $f_0$  der triviale Fluss ist, kann mittels vollständiger Induktion gezeigt werden, dass folgende Ungleichung gilt:

$$|f_{\max}| - |f_i| \leq |f_{\max}|(1 - 1/m)^i.$$

Da alle Kapazitäten ganzzahlig sind, folgt:

$$1 \leq |f_{\max}| - |f_{k-1}| \leq |f_{\max}|(1 - 1/m)^{k-1}.$$

Unter Verwendung der Ungleichung  $m(\log m - \log(m-1)) \geq 1$  zeigt man nun  $k-1 \leq m \log |f_{\max}|$ . Hieraus folgt die Aussage.

12. Es sei  $f$  ein maximaler Fluss des Netzwerkes.
  - (a) Wird die Kapazität jeder Kante um  $c$  erhöht, so erhöht sich auch der Wert eines maximalen Flusses um mindestens  $c$ . Dazu wird der Wert von  $f$  auf den Kanten eines Weges  $W$  von  $q$  nach  $s$  jeweils um  $c$  erhöht. Gibt es noch andere Wege  $W'$  von  $q$  nach  $s$ , welche mit  $W$  keine gemeinsamen Kanten haben, so kann der Wert von  $f$  noch weiter erhöht werden.
  - (b) Wird die Kapazität jeder Kante um den Faktor  $c$  erhöht, so setze man  $f'(k) = cf(k)$  für jede Kante  $k$  des Netzwerkes. Dann ist  $f'$  ein maximaler Fluss in dem neuen Netzwerk und es gilt  $|f'| = c|f|$ .
13. Die Kapazitäten der Kanten seien  $z_i/n_i$  für  $i = 1, \dots, m$ , wobei  $z_i$  und  $n_i$  positive ganze Zahlen sind. Ferner sei  $V$  das kleinste gemeinsame Vielfache der Nenner  $n_1, \dots, n_m$ . Dann ist  $f_{\Delta} \geq 1/V$  für jeden Erweiterungsweg jedes Flusses  $f$ . Ist  $f_{\max}$  ein maximaler Fluss, so endet der in Abschnitt 8.2 beschriebene Algorithmus spätestens nach  $|f_{\max}|V$  Schritten.
14. Der Wert eines Schnittes ist in beiden Netzwerken gleich. Die Behauptung folgt aus dem Satz von Ford-Fulkerson auf Seite 234.
15.
  - (a) Im Folgenden ist zunächst der Graph  $G_f$  dargestellt. Daneben der Graph, welcher von den Vorwärtskanten von  $G_f$  induziert wird. Da es in diesem Graph keinen Weg von  $q$  nach  $s$  gibt, ist  $f$  ein blockierender Fluss.
  - (b) Ganz rechts ist der Graph  $G'_f$  abgebildet.



- (c) Die in  $G_f'$  rot gezeichneten Kanten bilden einen blockierenden Fluss  $h$  mit Wert 1. Der neue Fluss  $f + h$  hat den Wert 12 und ist maximal. Dazu betrachte man den in  $G_f'$  durch die rot gestrichelte Linie dargestellten Schnitt  $(X, \bar{X})$ . Es gilt  $\kappa(X, \bar{X}) = 12$ .

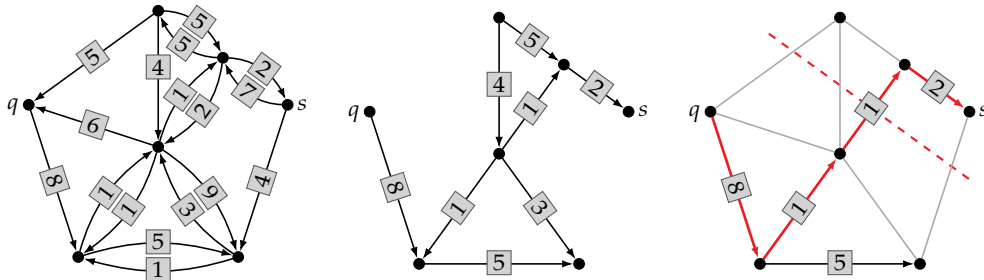

16. Da  $f_1$  und  $f_2$  Flüsse auf  $G$  sind, gilt  $f(k) \geq 0$  für jede Kante  $k$  von  $G$  und die Flusserhaltungsbedingung ist für  $f$  erfüllt. Somit ist  $f$  genau dann ein Fluss von  $G$ , wenn  $f_1(k) + f_2(k) \leq \kappa(k)$  für jede Kante  $k$  von  $G$  gilt.
17. Wird die Kapazität einer Kante um 1 erhöht, so erhöht sich der maximale Fluss höchstens um 1. Da die Kapazitäten ganzzahlig sind, findet der Algorithmus von Edmonds und Karp in einem Schritt (mit  $f$  startend) einen maximalen Fluss. Somit ist der Aufwand  $O(n + m)$ .
- Wird die Kapazität einer Kante um 1 erniedrigt, so erniedrigt sich der maximale Fluss höchstens um 1. Ist  $f(k) < \kappa(k)$ , so folgt aus der Ganzzahligkeit der Kapazitäten, dass  $f$  auch in dem neuen Netzwerk ein maximaler Fluss ist. Ist  $f(k) = \kappa(k)$ , so findet man mit Aufwand  $O(n + m)$  einen Weg  $W$  von  $q$  nach  $s$ , welcher die Kante  $k$  enthält und der Fluss durch jede Kante von  $W$  positiv ist. Bilde einen neuen Fluss  $f'$  durch  $f'(k) = f(k) - 1$  für alle Kanten  $k$  auf  $W$  und  $f'(k) = f(k)$  für alle Kanten, welche nicht auf  $W$  liegen. Dann ist  $f'$  ein zulässiger Fluss auf dem neuen Netzwerk mit  $|f'| = |f| - 1$ . Der Algorithmus von Edmonds und Karp findet in einem Schritt (mit  $f'$  startend) einen maximalen Fluss. Somit ist der Aufwand  $O(n + m)$ .
18. Die Prozeduren `erweitereVorwärts` und `erweitereRückwärts` können nicht direkt verwendet werden, sondern müssen noch angepasst werden. Das folgende Programm ist eine Variante der Prozedur `erweitereRückwärts`. Man beachte, dass am Ende der **while**-Anweisung die Flusserhaltungsbedingung für die entfernte Ecke  $e_i$  erfüllt ist (nur für  $e_i \neq e$ ). Die Prozedur `erweitereVorwärts` muss entsprechend abgeändert werden.

```

procedure erweitereRückwärts(var G : Netzwerk, e : Ecke, var f : Fluss)
    var durchfluss : Array[1..n] von Real;
    var W : Warteschlange von Ecke;
    var m : Real;
    var ei, ej : Ecke;

    Initialisiere durchfluss mit 0;
    durchfluss[G.index(e)] := fe;
    W.einfügen(e);
    repeat
        ei := W.entfernen();
        while durchfluss[ei] ≠ 0 do
            Sei k = (ei, ej) eine Kante mit f(k) > 0;
            m := min(f(k), durchfluss[ei]);
            f[ei, ej] := f[ei, ej] - m;
            if ej ≠ s then
                W.einfügen(ej);
            durchfluss[ej] := durchfluss[ej] + m;
            durchfluss[ei] := durchfluss[ei] - m;
    until W = ∅;
    
```

19. Die rot dargestellten Kanten bilden einen maximalen Fluss mit Wert 3.

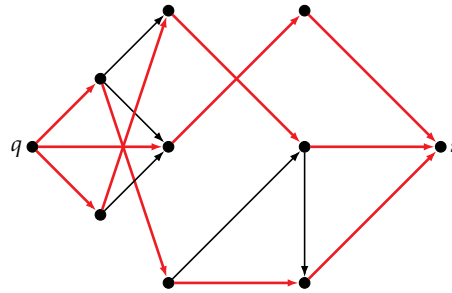

Hierzu werden die im Folgenden dargestellten drei blockierenden Flüsse gebildet. Dargestellt sind jeweils die geschichteten Hilfsnetzwerke und die blockierenden Flüsse (rote Kanten).

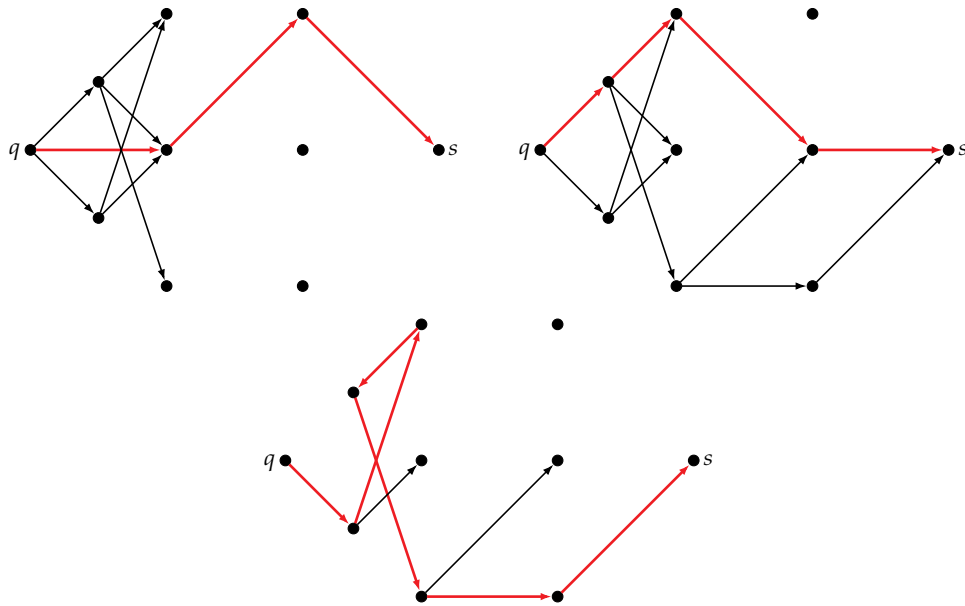

20. Wegen  $\alpha \in [0, 1]$  gilt für alle Kanten  $k$ :

$$0 \leq f_\alpha(k) = \alpha f_1(k) + (1 - \alpha)f_2(k) \leq \alpha \kappa(k) + (1 - \alpha)\kappa(k) = \kappa(k).$$

Für jede Ecke  $e \neq q, s$  von  $G$  gilt:

$$\begin{aligned} \sum_{k=(j,e) \in K} f_\alpha(k) &= \sum_{k=(j,e) \in K} \alpha f_1(k) + (1 - \alpha)f_2(k) \\ &= \alpha \sum_{k=(j,e) \in K} f_1(k) + (1 - \alpha) \sum_{k=(j,e) \in K} f_2(k) \\ &= \alpha \sum_{k=(e,j) \in K} f_1(k) + (1 - \alpha) \sum_{k=(e,j) \in K} f_2(k) \\ &= \sum_{k=(e,j) \in K} \alpha f_1(k) + (1 - \alpha)f_2(k) \\ &= \sum_{k=(e,j) \in K} f_\alpha(k) \end{aligned}$$

Es gilt  $|f_\alpha| = \alpha |f_1| + (1 - \alpha) |f_2|$ .

21. Es sei  $k$  eine Kante eines minimalen Schnittes von  $G$  mit positiver Kapazität. Dann ist die Kapazität eines minimalen Schnittes von  $G \setminus \{k\}$  echt kleiner als die eines minimalen Schnittes von  $G$ . Die Aussage folgt nun aus dem Satz von Ford und Fulkerson auf Seite 234.

22. Der Beweis der Aussagen erfolgt analog zu den Beweisen in Abschnitt 8.6. Der Beweis für Aussage (a) ergibt sich aus dem Beweis des Lemmas aus diesem Abschnitt auf Seite 252 und der für Aussage (b) aus dem Beweis des nachfolgenden Satzes auf Seite 254.



# Kapitel 9 – Anwendungen von Netzwerkalgorithmen

1. Für jede Kante  $k \in K$  wird eine binäre Variable  $x_k$  eingeführt, d. h.  $x_k \in \{0, 1\}$ . Desweiteren wird folgende Nebenbedingung definiert

$$\sum_{e \sim k} x_k \leq 1 \text{ für jede Ecke } e \text{ von } G.$$

Hierbei bedeutet  $e \sim k$  dass Ecke  $e$  zur Kante  $k$  inzident ist. Die zu maximierende Zielfunktion lautet

$$\sum_{k \in K} x_k.$$

2. In Abschnitt 9.1 wurde gezeigt, dass es eine eindeutige Beziehung zwischen den Zuordnungen eines bipartiten Graphen  $G$  und den binären Flüssen des zugehörigen 0-1-Netzwerkes  $N_G$  gibt. Es sei  $Z$  eine Zuordnung eines bipartiten Graphen  $G$ . Ein Weg  $W$ , welcher zwei nicht zugeordnete Ecken verbindet, heißt Erweiterungsweg für  $Z$ , falls jede zweite Kante von  $W$  in  $Z$  liegt. Die Erweiterungswege für  $Z$  in  $G$  entsprechen eindeutig den Erweiterungswegen bezüglich  $f_Z$  in  $N_G$ . Der Begriff des Erweiterungsweges lässt sich auch auf beliebige ungerichtete Graphen übertragen. Es gilt folgender Satz.

**Satz.** Eine Zuordnung  $Z$  in einem ungerichteten Graphen  $G$  ist genau dann maximal, wenn es in  $G$  für  $Z$  keinen Erweiterungsweg gibt.

**Beweis.** Es sei  $Z$  eine Zuordnung und  $W$  ein Erweiterungsweg für  $Z$ . Ferner sei  $Z'$  die symmetrische Differenz von  $Z$  und  $W$  ( $Z'$  besteht aus den Kanten, die entweder nur in  $Z$  oder nur in  $W$  liegen, aber nicht in beiden Mengen). Dann ist  $Z'$  eine Zuordnung für  $G$  und es gilt  $|Z'| = |Z| + 1$ . Somit kann es für eine maximale Zuordnung keinen Erweiterungsweg geben.

Es sei nun  $Z$  eine Zuordnung, welche nicht maximal ist, und  $Z'$  eine maximale Zuordnung. Bezeichne mit  $G'$  den von den Kanten aus  $Z \cup Z'$  induzierten Untergraphen von  $G$ . Für jede Ecke  $e$  von  $G'$  ist  $g(e) \leq 2$ . Ist  $g(e) = 2$ , so ist  $e$  zu genau einer Kante aus  $Z$  und einer Kante aus  $Z'$  inzident. Somit können die Zusammenhangskomponenten von  $G'$  in zwei Gruppen aufgeteilt werden: Geschlossene und einfache Wege. Auf diesen Wegen liegen abwechselnd Kanten aus  $Z$  und  $Z'$ . Da geschlossene Wege jeweils gleichviel Kanten aus  $Z$  und  $Z'$  enthalten und es in  $Z'$  mehr Kanten als in  $Z$  gibt, muss es in  $G'$  einen Weg geben, welcher zwei bezüglich  $Z$  nicht zugeordnete Ecken verbindet. Dies ist ein Erweiterungsweg für  $Z$  in  $G$ . ■

3. Mit einem Greedy-Verfahren (Aufwand  $O(n + m)$ ) wird eine nicht erweiterbare Zuordnung  $Z$  bestimmt. Ist  $Z$  noch keine vollständige Zuordnung, so ist  $|Z| < n/2$ . Dann gibt es Ecken  $e$  und  $e'$  von  $G$ , welche zu keiner Kante aus  $Z$  inzident sind. Da  $Z$  nicht erweiterbar ist, gibt es für jeden Nachbarn  $e_i$  von  $e$  oder  $e'$  genau eine zu  $e_i$  inzidente Kante aus  $Z$ . Wegen  $|Z| < n/2$  und  $g(e) + g(e') \geq n$  gibt es eine Kante  $k = (e_i, e_j) \in Z$ , sodass  $(e, e_i)$  und  $(e_j, e')$  Kanten in  $G$  sind. Somit ist auch

$$Z' = Z \setminus \{k\} \cup \{(e, e_i), (e_j, e')\}$$

eine Zuordnung von  $G$ . Dieses Verfahren wiederholt man bis eine vollständige Zuordnung vorliegt. Der Aufwand des folgenden Algorithmus ist  $O(n + m)$ .

**var**  $L$  : Array[1..n] **von** Ecke;

Bestimme mit einem Greedy – Verfahren nicht erweiterbare Zuordnung  $Z$ ;

Initialisiere  $L$  mit  $\perp$ ;

```

for alle nicht zugeordneten Ecken  $e, e'$  do
  foreach  $e_i$  in  $N(e)$  do
    Sei  $(e_i, e_j)$  eine Kante in  $Z$ ;
     $L[j] = e_i$ ;
    Suche Nachbarn  $e_i$  von  $e'$  mit  $L[i] \neq \emptyset$ ;
     $Z := Z \setminus \{(e_i, L[i])\} \cup \{(e, L[i]), (e_i, e')\}$ ;
  foreach  $e_i$  in  $N(e)$  do
    Sei  $(e_i, e_j)$  eine Kante in  $Z$ ;
     $L[j] := \perp$ ;

```

4. Die rot markierten Kanten bilden jeweils eine maximale Zuordnung.

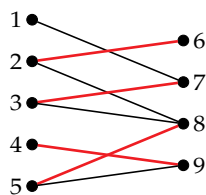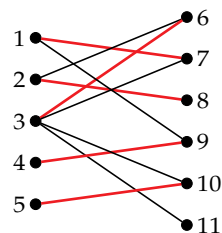

5. Die rot markierten Kanten bilden eine vollständige Zuordnung.

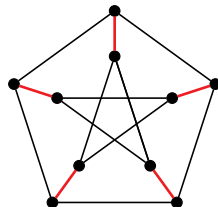

6. Wegen  $\alpha(G) = 2$  besteht jede Farbklasse einer Färbung von  $G$  aus maximal zwei Ecken. Es sei  $a$  die Anzahl der Farbklassen mit zwei Ecken einer minimalen Färbung von  $G$ . Dann ist  $\chi(G) = a + (n - 2a) = n - a$ . Die Farbklassen mit zwei Ecken induzieren eine Zuordnung auf  $\bar{G}$  mit  $a$  Kanten. Somit gilt  $a \leq z$  und  $\chi(G) \geq n - z$ . Jede maximale Zuordnung auf  $\bar{G}$  induziert eine Färbung mit  $n - z$  Farben auf  $G$ . Somit gilt  $\chi(G) \leq n - z$ .
7. Angenommen es gibt einen Baum  $B$  mit zwei verschiedenen vollständigen Zuordnungen  $M_1$  und  $M_2$ . Es sei  $M$  die Menge der Kanten, welche entweder in  $M_1$  oder in  $M_2$  enthalten sind (aber nicht in beiden Zuordnungen). Da  $M_1$  und  $M_2$  verschieden sind, ist  $M \neq \emptyset$ . Jede Ecke  $e$  von  $B$  ist entweder zu zwei Kanten aus  $M$  oder zu keiner Kante aus  $M$  inzident. Somit muss  $M$  einen geschlossenen Weg enthalten. Dieser Widerspruch zeigt die Behauptung.
8. Es sei  $T \subseteq E_1$ . Ferner sei  $K_1$  die Menge der Kanten von  $G$ , welche zu einer Ecke aus  $T$  inzident sind, und  $K_2$  die Menge der Kanten von  $G$ , welche zu einer Ecke aus  $N(T)$  inzident sind. Es gilt  $K_1 \subseteq K_2$ . Aus der Voraussetzung folgt  $|T|k \leq |K_1|$  und  $|N(T)|k \geq |K_2|$ . Somit gilt  $|N(T)| \geq |T|$  für alle Teilmengen  $T$  von  $E_1$ . Die Aussage folgt nun aus dem Satz von Hall (siehe Seite 268).
9. Es sei  $U'$  bzw.  $U$  die Menge der Ecken, welche zu keiner Kante aus  $Z'$  bzw.  $Z$  inzident sind. Dann sind  $U'$  und  $U$  unabhängige Mengen mit  $|U'| = n - 2|Z'|$  und  $|U| = n - 2|Z|$ . Eine maximale unabhängige Menge von  $G$  hat maximal  $|Z| + |U|$  Ecken. Somit gilt:

$$n - 2|Z'| = |U'| \leq \alpha(G) \leq |Z| + |U| = n - |Z|.$$

Hieraus folgt  $|Z| \leq 2|Z'|$ .

10. Nach dem Satz von Hall (siehe Seite 268) hat  $G$  genau dann keine Zuordnung  $Z$  mit  $|Z| = |E_1|$ , wenn es eine Teilmenge  $D$  von  $E_1$  mit  $|D| > |N(D)|$  gibt. Zunächst wird ein maximaler binärer Fluss  $f$  auf dem zu  $G$  gehörenden 0-1-Netzwerk  $N_G$  bestimmt. Gilt  $|f| = |E_1|$ , so existiert keine Teilmenge  $D$  von  $E_1$  mit  $|D| > |N(D)|$ . Gilt  $|f| < |E_1|$ , so wird die Menge  $X$  aller Ecken aus  $N_G$  bestimmt, welche von  $q$  über Erweiterungswege bezüglich  $f$  erreichbar sind. Es sei  $D = X \cap E_1$ . Wie im Beweis des Satzes von Hall in Abschnitt 9.1 zeigt man  $|f| = |E_1 \setminus X| + |N(D)|$ . Wegen  $|E_1| = |E_1 \setminus X| + |D|$  folgt nun  $|D| > |N(D)|$ . Dieser Algorithmus hat eine Laufzeit von  $O(\sqrt{nm})$ .
11. Es sei  $G$  ein kantenbewerteter, vollständig bipartiter Graph und  $e$  eine beliebige Ecke von  $G$ . Es sei  $G'$  eine Kopie von  $G$ , in der die Bewertungen aller zu  $e$  inzidenten Kanten um  $b$  geändert sind. Dann ist jede vollständige Zuordnung von  $G$  auch eine vollständige Zuordnung von  $G'$  (und umgekehrt). Die Kosten der beiden Bewertungen unterscheiden sich um  $b$ . Es sei  $B = b_1 + \dots + b_{|E_1|}$ , wobei  $b_i = \min\{\text{kosten}(k) \mid k \text{ zu } e_i \in E_1 \text{ inzidente Kante}\}$  ist. Ist die maximale Zuordnung für  $G_0$  auch für  $G$  vollständig, so hat man eine vollständige Zuordnung für  $G$  mit minimalen Kosten  $B$ . Andernfalls bestimme man, wie in Aufgabe 10 beschrieben, eine Teilmenge  $X$  von  $E_1$  mit  $|N_{G_0}(X)| < |X|$  und verändere den Graphen  $G_0$ . Man beachte, dass  $G_0$  mindestens eine zusätzliche Kante besitzt. Ist die maximale Zuordnung für  $G_0$  auch für  $G$  vollständig, so hat man eine vollständige Zuordnung für  $G$  mit minimalen Kosten  $B + (|X| - |N_{G_0}(X)|)b_{\min}$ . Andernfalls wird der letzte Schritt wiederholt. Da in jedem Schritt  $G_0$  mindestens eine zusätzliche Kante bekommt, sind maximal  $|E_1|(|E_1| - 1) < n^2$  Durchgänge notwendig.
12. Es sei  $G$  ein kantenbewerteter bipartiter Graph und  $T$  die Summe der Bewertungen aller Kanten von  $G$ . Durch Hinzufügen neuer Ecken und Kanten mit Bewertung  $T$  erhält man einen Graph  $G'$  mit den in Aufgabe 11 angegebenen Eigenschaften. Jede Zuordnung von  $G$  kann zu einer Zuordnung von  $G'$  ergänzt werden. Die Wahl von  $T$  bedingt, dass aus einer Zuordnung mit minimalen Kosten für  $G$  eine vollständige Zuordnung mit minimalen Kosten für  $G'$  entsteht. Es sei  $Z'$  eine vollständige Zuordnung von  $G'$  mit minimalen Kosten. Entfernt man alle Kanten mit Bewertung  $T$  aus  $Z'$ , so erhält man eine Zuordnung  $Z$  von  $G$ . Dies ist eine maximale Zuordnung mit minimalen Kosten. Der in Aufgabe 11 angegebene Algorithmus kann also zur Bestimmung maximaler Zuordnungen mit minimalen Kosten in beliebigen kantenbewerteten bipartiten Graphen verwendet werden.

Eine nicht erweiterbare Zuordnung mit minimalen Kosten ist nicht notwendigerweise eine maximale Zuordnung wie der folgende Graph zeigt. Die rot markierte Kante bildet eine nicht erweiterbare Zuordnung mit minimalen Kosten. Diese Zuordnung ist aber nicht maximal.

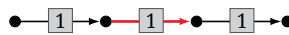

Der Zusammenhang zwischen maximalen Zuordnungen mit minimalen Kosten in kantenbewerteten, vollständig bipartiten Graphen vom Typ  $G_{n,n}$  und maximalen Zuordnungen in beliebigen kantenbewerteten bipartiten Graphen ist nicht auf nicht erweiterbare Zuordnungen übertragbar. Somit kann der angegebene Algorithmus nicht zur Bestimmung nicht erweiterbarer Zuordnungen mit minimalen Kosten verwendet werden.

13. Es sei  $G'$  das angegebene neue Netzwerk. Jedem  $q$ - $s$ -Fluss  $f$  auf  $G$  entspricht ein  $s$ - $q$ -Fluss  $f'$  auf  $G'$  und umgekehrt. Dazu definiert man

$$f((e, e')) = -f'((e', e))$$

für alle Kanten  $(e, e')$ . Man beweist direkt, dass  $f'$  genau dann zulässig für  $G'$  ist, wenn  $f$  zulässig für  $G$  ist. Ferner ist  $f$  genau dann minimal zulässig, wenn  $f'$  maximal zulässig ist. Somit genügt es einen maximalen Fluss für das Netzwerk  $G'$  zu konstruieren. Hierzu konstruiert man zunächst wie in Abschnitt 9.2 angegeben einen zulässigen Fluss für  $G$ , dieser induziert einen zulässigen

Fluss auf  $G'$ . Mithilfe von Erweiterungswegen kann dieser zu einem zulässigen maximalen Fluss für  $G'$  erweitert werden. Dieser entspricht dann einen minimalen zulässigen Fluss auf  $G$ .

14. Der Fluss mit Wert 2 auf der Kante  $(e_1, e_2)$  und dem Wert 1 auf allen anderen Kanten hat unter den zulässigen Flüssen des Netzwerkes aus Abbildung 9.7 den kleinsten Wert.
15. Links ist ein minimaler Fluss dargestellt und rechts ein maximaler. Die Werte der Flüsse sind 10 und 11.

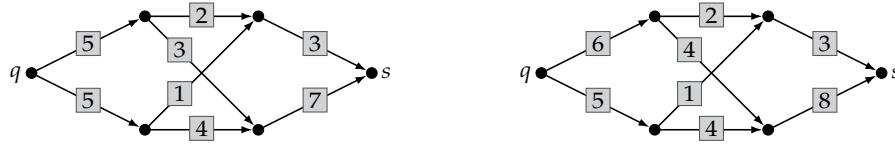

16. Genau dann gibt es einen zulässigen Fluss auf  $G$ , wenn jede Kante von  $G$  auf einem Weg von  $q$  nach  $s$  liegt.
17. In Aufgabe 13 wurde aus einem Netzwerk  $G$  mit oberen und unteren Kapazitätsgrenzen ein neues Netzwerk  $G'$  konstruiert. Der Wert eines minimalen zulässigen  $q$ - $s$ -Flusses  $f_{min}$  auf  $G$  ist gleich dem negativen Wert eines maximal zulässigen  $s$ - $q$ -Flusses  $f_{max}$  auf  $G'$ . Ist  $(X, \bar{X})$  ein  $q$ - $s$ -Schnitt von  $G$ , so ist  $(\bar{X}, X)$  ein  $s$ - $q$ -Schnitt von  $G'$  und es gilt  $\kappa_G(X, \bar{X}) = -\kappa_{G'}(\bar{X}, X)$ . Somit gilt:

$$\begin{aligned}
 |f_{min}| &= -|f_{max}| \\
 &= -\min\{\kappa_{G'}(X, \bar{X}) \mid (X, \bar{X}) \text{ ist ein } s\text{-}q\text{-Schnitt von } G'\} \\
 &= -\min\{-\kappa_G(\bar{X}, X) \mid (\bar{X}, X) \text{ ist ein } q\text{-}s\text{-Schnitt von } G\} \\
 &= -\min\{\kappa_G(X, \bar{X}) \mid (\bar{X}, X) \text{ ist ein } q\text{-}s\text{-Schnitt von } G\} \\
 &= -\min\{\kappa_G(\bar{X}, X) \mid (X, \bar{X}) \text{ ist ein } q\text{-}s\text{-Schnitt von } G\}
 \end{aligned}$$

18. Der Beweis aus Abschnitt 9.4 für die angegebene Aussage über den Kantenzusammenhang kann nicht auf den Eckenzusammenhang übertragen werden. In einem Graph  $G$  kann es eine Ecke  $e''$  geben, welche in jeder trennenden Eckenmenge jedes Paares  $e, e'$  von Ecken mit  $Z^e(e, e') = Z^e(G)$  liegt. Dies ist z. B. gegeben, wenn eine Ecke  $e''$  zu jeder anderen Ecke benachbart ist. Betrachten Sie z. B. die Ecken mit Grad 3 in folgendem Graph:

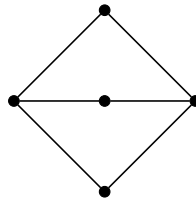

19. Es sei  $T^k$  eine minimale trennende Kantenmenge für  $e, e'$ . Der Graph  $G \setminus T^k$  ist nicht mehr zusammenhängend und  $e$  und  $e'$  liegen in verschiedenen Zusammenhangskomponenten. Dann liegt  $e''$  entweder in der gleichen Zusammenhangskomponente wie  $e$  oder  $e'$  oder in einer anderen Zusammenhangskomponente. Auf jeden Fall ist  $T^k$  eine trennende Eckenmenge für  $e, e''$  oder  $e'', e'$ . Somit gilt  $Z^k(e, e') \geq \min\{Z^k(e', e''), Z^k(e'', e')\}$ .
20. Es sei  $E$  die Eckenmenge von  $G$  und  $G'$  der vollständige Graph mit Eckenmenge  $E$ . Jede Kante  $(a, b)$  von  $G'$  wird mit  $|f_{ab}|$  bewertet (man beachte, dass  $|f_{ab}| = |f_{ba}|$  gilt, dies gilt nicht für un-symmetrische Netzwerke). Es sei  $B$  ein maximal aufspannender Baum von  $G'$  und  $e, e'$  beliebige Ecken aus  $E$ . Für die Kanten  $k_i = (a_i, b_i)$  eines Weges  $W$  von  $e$  nach  $e'$  in  $B$  gilt somit:

$$|f_{ee'}| \leq \min\{|f_{a_i b_i}| \mid (a_i, b_i) \in W\}.$$



In Abschnitt 9.4 wurde bewiesen, dass  $|f_{ab}| = Z^k(a, b)$  für jedes Paar von Ecken  $a, b$  aus  $G$  gilt. Aus Aufgabe 19 folgt somit  $|f_{ee'}| = \min\{|f_{a_i b_i}| \mid (a_i, b_i) \in W\}$ . Zu jedem Paar von Ecken  $a, b$  von  $G$  gibt es also eine Kante  $(e, e')$  von  $B$  mit  $|f_{ab}| = |f_{ee'}|$ . Da  $B$   $n - 1$  und  $G'$   $n(n - 1)/2$  Kanten hat, muss es mindestens  $n/2$  Eckenpaare geben, sodass die Werte der entsprechenden maximalen Flüsse alle gleich sind.

21. Es sei  $N_G$  das zu  $G$  gehörende 0-1-Netzwerk und  $f$  ein binärer Fluss auf  $N_G$ . Ferner sei  $W$  ein einfacher Erweiterungsweg von  $N_G$  bezüglich  $f$  und  $f'$  der durch  $W$  entstandene erhöhte Fluss. Die spezielle Struktur von  $N_G$  bewirkt, dass sich auf  $W$  Vorwärts- und Rückwärtskanten abwechseln. Des Weiteren beginnt und endet  $W$  mit einer Vorwärtskante. Für jede Ecke  $e$  sei  $f(e)$  bzw.  $f'(e)$  der Fluss durch die Ecke  $e$  bezüglich  $f$  bzw.  $f'$ . Es gilt  $f'(e) \geq f(e)$  für jede Ecke  $e$  von  $G$ .

Die Kanten aus  $Z$  induzieren einen binären Fluss  $f_Z$  auf  $N_G$  (vergleichen Sie hierzu den Beweis des Lemmas aus Abschnitt 9.1 auf Seite 266). Es sei  $f$  ein binärer maximaler Fluss von  $N_G$ , welcher durch eine Folge von Erweiterungswegen aus  $f_Z$  entsteht. Dann gilt  $f(e) \geq f_Z(e)$  für jede Ecke  $e$  von  $G$ . Hieraus folgt die zu beweisende Aussage.

22. Der Beweis erfolgt durch vollständige Induktion nach  $s$ . Da  $Q_1$  zusammenhängend ist, gilt die Aussage für  $s = 1$ . Sei nun  $s > 1$ . Bezeichne für  $i = 0, 1$  den von den Ecken  $\{(i, a_2, \dots, a_s) \mid a_j \in \{0, 1\}\}$  induzierten Untergraph von  $Q_s$  mit  $Q^i$ . Diese beiden Untergraphen sind Hypercubes der Dimension  $s - 1$  und jede Ecke von  $Q^1$  ist in  $Q_s$  mit genau einer Ecke in  $Q^0$  verbunden. Sei nun  $M$  eine beliebige  $(s - 1)$ -elementige Teilmenge der Eckenmenge  $E$  von  $Q_s$ . Es muss gezeigt werden, dass der von  $E \setminus M$  induzierte Untergraph  $U$  von  $Q_s$  zusammenhängend ist. Ist  $0 < |M \cap Q^0| < s - 1$ , so sind nach Induktionsvoraussetzung die von  $Q^0 \setminus M$  und  $Q^1 \setminus M$  induzierten Untergraphen zusammenhängend und damit ist auch  $U$  zusammenhängend. Andernfalls ist  $M$  vollständig in  $Q^0$  oder in  $Q^1$  enthalten. Auch in diesem Fall ist  $U$  zusammenhängend.

23. Sowohl die Ecken- als auch Kantenzusammenhangszahl ist gleich 3.

24. Für beide Graphen gilt  $Z^e(G) = 4$ .

25. Es gilt  $Z^e(G) = Z^k(G) = 3$ .

26. Es sei  $G$  ein 2-fach kantenzusammenhängender Graph und  $X$  die Menge der Ecken, welche in  $G'$  von der Startecke  $s$  aus erreichbar sind. Ferner sei  $Y$  die Menge der restlichen Ecken. Angenommen  $Y$  ist nicht leer. Es sei  $e \in Y$  die Ecke mit der kleinsten Tiefensuchenummer. Da  $G$  zusammenhängend ist, sind alle Ecken aus  $Y$  im Tiefensuchebaum Nachfolger von  $e$ . Es sei  $(e_i, e_j)$  eine Kante aus  $G$  mit  $e_i \in X$  und  $e_j \in Y$ . Im Folgenden wird gezeigt, dass es nur eine solche Kante gibt. Dies steht aber im Widerspruch zu  $Z^k(G) \geq 2$ . Somit ist  $Y$  leer. Da  $e_j$  nicht in  $X$  liegt, ist  $(e_j, e_i)$  eine Kante in  $G'$ . Wäre  $(e_i, e_j)$  in  $G$  eine Rückwärtskante, so wäre  $\text{tsNummer}[j] < \text{tsNummer}[i]$ , d. h.,  $e_i$  wäre Nachfolger von  $e_j$  im Tiefensuchebaum. Dann wäre aber  $e_j$  von  $e_i$  in  $G'$  erreichbar und somit auch  $e_j$  von  $s$ . Somit muss  $(e_i, e_j)$  in  $G$  eine Baumkante sein. Da  $e_j$  im Tiefensuchebaum ein Nachfolger von  $e$  ist, muss  $e_j = e$  sein und  $e_i$  der Vorgänger von  $e$  im Tiefensuchebaum sein. Also ist  $(e_i, e_j)$  die einzige Kante in  $G$ , die Ecken aus  $X$  und  $Y$  verbindet.

Sei nun umgekehrt jede Ecke in  $G'$  von der Startecke  $s$  aus erreichbar. Dann ist  $G$  zusammenhängend. Angenommen  $Z^k(G) = 1$  und  $\{k\}$  ist eine trennende Kantenmenge für  $G$ . Dann muss  $k = (e_i, e_j)$  in  $G$  eine Baumkante sein. Also ist  $b$  in  $G'$  nicht von  $s$  aus erreichbar.

Der Aufwand ist  $O(m)$ , da die Tiefensuche zweimal angewendet wird.

27. Es sei  $R$  das Rechteck, bei dem die entfernten Felder in diagonal gegenüberliegenden Ecken liegen. Eine Seite von  $R$  hat gerade und die andere ungerade Länge. Die Fläche des Schachbrettes

außerhalb von  $R$  kann in 4 Rechtecke aufgeteilt werden. Mindestens eine Seite jedes Rechtecks hat gerade Länge (eventuell 0). Dieser Teil des Schachbrettes kann somit mit Rechtecken der Größe  $1 \times 2$  vollständig abgedeckt werden.  $R$  ohne die beiden Felder kann in 3 Rechtecke aufgeteilt werden, bei denen jeweils eine Seite gerade Länge hat (eventuell 0). Somit gibt es auch eine Überdeckung für  $R$ .

Die schwarzen und weißen Felder des Schachbrettes induzieren einen bipartiten Graph. Eine vollständige Überdeckung mit Rechtecken entspricht einer vollständigen Zuordnung dieses Graphen. Da zwei diagonal gegenüberliegende Felder die gleiche Farbe haben, besitzt der Restgraph keine vollständige Zuordnung. Somit gibt es auch keine vollständige Überdeckung der Restfläche.

28. Gibt es eine vollständige Zuordnung von  $G$ , so gilt  $|E_1| = |E_2|$  und eine Eckenüberdeckung muss mindestens  $|E_1| = (|E_1| + |E_2|)/2$  Ecken enthalten. Für die umgekehrte Beweisrichtung beachte man, dass sowohl  $E_1$  als auch  $E_2$  Eckenüberdeckungen von  $G$  sind. Da beide deshalb mindestens  $(|E_1| + |E_2|)/2$  Ecken enthalten, folgt daraus  $|E_1| = |E_2|$ . Nun folgt aus dem Satz von König-Egerváry (siehe Seite 294), dass  $G$  eine vollständige Zuordnung besitzt.
29. Eine Ecke  $e$  in einer minimalen Eckenüberdeckung von  $G$  überdeckt maximal  $n$  Kanten. Hieraus folgt, dass eine minimale Eckenüberdeckung aus mindestens  $s$  Ecken bestehen muss. Die Aussage folgt nun aus dem Satz von König-Egerváry (siehe Seite 294).
30. Es sei  $(X, \bar{X})$  ein nicht trivialer Schnitt eines  $c$ -kantenkritischen Graphen  $G$  und  $T^k$  die Menge der Kanten mit einer Ecke in  $X$  und einer Ecke in  $\bar{X}$ . Angenommen es gilt  $|T^k| < c$ . Nach Voraussetzung können die von  $X$  und  $\bar{X}$  induzierten Untergraphen mit höchstens  $c - 1$  Farben gefärbt werden. Bezeichne mit  $X_1, \dots, X_{c-1}$  bzw.  $\bar{X}_1, \dots, \bar{X}_{c-1}$  die entsprechenden Farbklassen dieser Graphen (einige dieser Mengen sind eventuell leer). Es sei  $B$  der bipartite Graph mit Eckenmenge  $\{X_1, \dots, X_{c-1}\} \cup \{\bar{X}_1, \dots, \bar{X}_{c-1}\}$ . Genau dann gibt es eine Kante zwischen  $X_i$  und  $\bar{X}_j$ , falls es in  $G$  keine Kante gibt, welche eine Ecke aus  $X_i$  mit einer Ecke aus  $\bar{X}_j$  verbindet. Nach Annahme besitzt  $B$  mindestens  $(c - 1)^2 - (c - 2) = c^2 - 3c + 3$  Kanten. Da der Grad jeder Ecke von  $B$  maximal  $c - 1$  ist, überdeckt eine Menge von  $c - 2$  Ecken maximal  $(c - 2)(c - 1) = c^2 - 3c + 2$  Kanten. Somit enthält jede Eckenüberdeckung von  $B$  mindestens  $c - 1$  Ecken. Nach dem Satz von König-Egerváry (siehe Seite 294) besitzt  $B$  eine vollständige Zuordnung mit  $c - 1$  Kanten. Es seien  $X_i$  und  $\bar{X}_j$  die Ecken einer Kante einer solchen maximalen Zuordnung. Nach Definition von  $B$  ist  $X_i \cup \bar{X}_j$  somit eine unabhängige Menge. Die Eckenmenge von  $G$  kann also in  $c - 1$  unabhängige Mengen aufgeteilt werden, d. h.  $\chi(G) \leq c - 1$ . Dieser Widerspruch zeigt, dass  $|T^k| \geq c - 1$  ist, d. h., die Kantenzusammenhangszahl ist mindestens  $c - 1$ .
31. Nach den Ergebnissen aus Abschnitt 6.5 gilt  $\delta(G) \leq 5$ . Nach dem ersten Satz in Abschnitt 9.4 auf Seite 284 gilt dann  $Z^e(G) \leq \delta(G) \leq 5$ .
32. Für die Graphen  $I_n$  mit  $n \geq 5$  gilt  $Z^k(I_n) = Z^e(I_n) = 4$ .
33. Es seien  $e, e'$  Ecken mit  $Z^e(e, e') = 1$  und  $\{e_x\}$  eine trennende Eckenmenge für  $a, b$ . Der Graph  $G \setminus \{e_x\}$  zerfällt in die Zusammenhangskomponenten  $Z_1, \dots, Z_s$  mit  $s > 1$ . Es sei  $K_i$  die Menge der Kanten, welche  $e_x$  mit Ecken aus  $Z_i$  verbinden. Diese Mengen sind trennende Kantenmengen für  $e, e'$ . Da  $e_x$  den Grad  $\Delta$  hat, gibt es ein  $K_i$  mit  $|K_i| \leq \Delta/2$ . Somit gilt  $Z^k(G) \leq |K_i| \leq \Delta/2$ .
34. Sowohl die Ecken- als auch Kantenzusammenhangszahl ist gleich 2.
35. Das Tiefesucheverfahren legt die Reihenfolge, in der die Nachbarn einer Ecke besucht werden, nicht fest. Es wird folgende Reihenfolge betrachtet: Für jede Ecke wird zunächst der unbesuchte Nachbar betrachtet, welcher über eine Kante aus  $Z$  erreichbar ist (falls vorhanden). Es sei  $B$

der hierdurch entstehende Tiefensuchebaum und  $(e, e')$  eine beliebige Kante aus  $Z$ . Ohne Einschränkung der Allgemeinheit kann angenommen werden, dass  $e$  vor  $e'$  besucht wurde. Somit wurde beim Besuch von  $e$  der Nachbar  $e'$  zuerst betrachtet. Da zu diesem Zeitpunkt  $e'$  noch nicht besucht wurde, wird  $(e, e')$  in  $B$  eingefügt. Somit sind alle Kanten aus  $Z$  auch in  $B$  enthalten.

36. Es sei  $e_i$  eine Ecke von  $B$ , welche zu keiner Kante aus  $Z$  inzident ist. Somit wurde  $e_i$  im Verlauf des Algorithmus nicht markiert. Beim Verlassen von  $e_i$  durch die Tiefensuche muss somit der Vorgänger  $e_j$  von  $e_i$  schon markiert sein. Da die Tiefensuche in diesem Moment  $e_j$  noch nicht verlassen hat, muss es einen Nachfolger  $e_s$  von  $e_j$  geben, sodass die Kante  $(e_j, e_s)$  in  $Z$  liegt.

Angenommen es gibt in  $B$  einen Erweiterungsweg  $W = \langle e_1, \dots, e_s \rangle$  bezüglich  $Z$  (vergleichen Sie Aufgabe 11). Nach Konstruktion von  $Z$  ist  $s \geq 4$ . Ohne Einschränkung der Allgemeinheit kann angenommen werden, dass  $e_2$  der Vorgänger von  $e_1$  im Tiefensuchebaum ist (sonst ist  $e_{s-1}$  ein Vorgänger von  $e_s$ ). Nach der oben bewiesenen Eigenschaft muss  $e_3$  ein Nachfolger von  $e_2$  sein. Somit ist  $\langle e_s, e_{s-1}, \dots, e_2 \rangle$  ein gerichteter Weg im Tiefensuchebaum. Analog zu oben zeigt man, dass  $e_{s-2}$  ein Nachfolger von  $e_{s-1}$  ist. Dieser Widerspruch zeigt, dass es bezüglich  $Z$  keinen Erweiterungsweg gibt. Somit ist  $Z$  eine maximale Zuordnung von  $B$ .

37. Es sei  $U_{\max} \in \mathcal{U}$  mit  $f(U_{\max}) = \max\{f(U) \mid U \in \mathcal{U}\}$ . Wird eine Kante aus  $U_{\max}$  entfernt, so entsteht eine isolierte Ecke (da die Anzahl der Ecken unverändert bleibt, würde andernfalls  $f(U'_{\max}) > f(U_{\max})$  für den neuen Graphen  $U'_{\max}$  gelten). Somit enthält  $U_{\max}$  keinen geschlossenen Weg und  $U_{\max}$  ist ein Wald. Aus dem gleichen Grund gibt es in  $U_{\max}$  auch keinen Weg der Länge 3. Daraus folgt, dass jede Zusammenhangskomponente von  $U_{\max}$  ein Sterngraph ist. Es sei  $s$  die Anzahl der Zusammenhangskomponenten von  $U_{\max}$ . Bezeichnet man mit  $k$  die Anzahl der Kanten in  $U_{\max}$ , so enthält  $U_{\max}$  genau  $k + s$  Ecken und es gilt  $f(U_{\max}) = (k + s - 1)/k$ . Angenommen  $s > 1$ . Nun wird ein neuer Untergraph  $U'_{\max}$  von  $G$  gebildet.  $U'_{\max}$  enthält aus jeder Zusammenhangskomponente genau eine Kante. Dann gilt  $U'_{\max} \in \mathcal{U}$  und  $f(U'_{\max}) = (2s - 1)/s$ . Aus  $f(U_{\max}) \geq f(U'_{\max})$  folgt nun  $s \geq k$ , d. h., die Kanten in  $U_{\max}$  bilden eine Zuordnung. Aus der Maximalität von  $f(U_{\max})$  folgt, dass diese Zuordnung maximal ist. Andernfalls ist  $s = 1$  und man sieht direkt, dass  $G$  bis auf isolierte Ecken ein Sterngraph ist.

38. (a) Jede Ecke muss zu mindestens einer Ecke einer anderen Farbklasse benachbart sein, andernfalls würde es eine zweite Färbung von  $G$  geben.
- (b) Es seien  $F_1$  und  $F_2$  zwei Farbklassen. Angenommen der von  $F_1 \cup F_2$  induzierte Untergraph  $U$  ist nicht zusammenhängend. Es seien  $U_1$  und  $U_2$  Zusammenhangskomponenten von  $U$ . Da jede Ecke zu mindestens einer Ecke einer anderen Farbklasse benachbart ist, enthalten  $U_1$  und  $U_2$  Ecken unterschiedlicher Farben. Vertauscht man die beiden Farben der Ecken in  $U_1$ , so gelangt man zu einer zweiten Färbung von  $G$ . Dieser Widerspruch zeigt die Behauptung.
- (c) Angenommen es gibt eine Menge  $M$  mit  $c - 2$  Ecken, sodass der durch das Entfernen dieser Ecken entstehende Graph  $G'$  nicht mehr zusammenhängend ist. Dann gibt es zwei Farben  $f_1$  und  $f_2$ , mit denen keine der Ecken in  $M$  gefärbt ist. Es seien  $e_1$  bzw.  $e_2$  Ecken, die mit  $f_1$  bzw.  $f_2$  gefärbt sind. Nach Teil (b) gibt es zwischen diesen Ecken einen Weg, dessen Ecken nur mit  $f_1$  und  $f_2$  gefärbt sind. Somit liegen alle mit  $f_1$  bzw.  $f_2$  gefärbten Ecken in einer einzigen Zusammenhangskomponente  $G_1$  von  $G'$ . Ändert man nun die Färbung einer Ecke in  $G' \setminus G_1$  in  $f_1$  um, so erhält man eine zweite Färbung von  $G$ . Dieser Widerspruch zeigt die Behauptung.

39. Es sei  $Z$  eine Zuordnung von  $G$  mit  $t$  Kanten,  $Z_1$  die Menge der Ecken aus  $E_1$ , welche zu Kanten aus  $Z$  inzident sind, und  $T \subseteq E_1$ . Dann ist

$$|E_1| \geq |T \cup Z_1| = |T| + |Z_1| - |T \cap Z_1|.$$

Wegen  $|N(T)| \geq |T \cap Z_1|$  und  $|Z_1| = t$  folgt:

$$|N(T)| \geq |T| + t - |E_1|.$$

Sei nun umgekehrt  $|N(T)| \geq |T| + t - |E_1|$  für jede Teilmenge  $T$  von  $E_1$ . Man betrachte das zugehörige Netzwerk  $N_G$  und einen maximalen binären Fluss  $f$ . Wie in dem Beweis des Satzes von Hall (siehe Seite 268) zeigt man nun  $|f| = \kappa(X, \bar{X}) = |E_1 \setminus X| + |N(X \cap E_1)|$ . Nach Voraussetzung gilt nun  $|f| \geq |E_1 \setminus X| + |X \cap E_1| + t - |E_1| = t$ . Sei nun  $Z$  die Menge aller Kanten aus  $G$ , für die der Fluss  $f$  durch die entsprechende Kante in  $N_G$  gerade 1 ist. Da jede Ecke aus  $E_1$  in  $N_G$  den Eingrad 1 und jede Ecke aus  $E_2$  in  $N_G$  den Ausgrad 1 hat, folgt aus der Flusserhaltungsbedingung, dass  $Z$  eine Zuordnung mit  $|f| \geq t$  Kanten ist.

40. Die Kanten einer Farbklassse einer Kantenfärbung bilden eine Zuordnung von  $G$ . Somit enthält jede Farbklassse maximal  $|M|$  Kanten und  $G$  hat insgesamt maximal  $\chi'(G)|M|$  Kanten. Aus der Voraussetzung folgt nun direkt  $\chi'(G) > \Delta(G)$ .

41. (a)  $\rho(C_n) = 1$  und  $\rho(K_n) = (n-1)/2$  für  $n > 2$ .

- (b) Es sei  $K$  die Menge der Kanten und  $E$  die Menge der Ecken von  $G$ . Definiere einen bipartiten Graphen  $G_r$  mit Eckenmenge  $E_1 \cup E_2$ , wobei  $E_1 = K$  ist und  $E_2$  aus  $r$  Kopien von  $E$  besteht. Eine Ecke  $(u, v) \in E_1$  ist zu den  $r$  Kopien von  $u$  und  $v$  inzident, d. h., für  $x \in E_1$  gilt  $g(x) = 2r$ . Es sei  $H$  ein Untergraph von  $G$  mit Eckenmenge  $E_H$  und Kantenmenge  $K_H$ . Betrachtet man  $K_H$  als Teilmenge der Ecken von  $G_r$ , dann gilt  $|N(K_H)| = r|E_H|$ . Somit gilt  $|N(K_H)| \geq |K_H|$  genau dann, wenn  $|K_H|/|E_H| \leq r$  gilt. Mithilfe des Satzes von Hall (siehe Seite 268) folgt nun, dass genau dann  $\rho(G) \leq r$  gilt, wenn  $G_r$  eine Zuordnung mit  $|K|$  Kanten besitzt.

Hieraus ergibt sich sofort ein Algorithmus für das beschriebene Problem: Für einen gegebenen Graphen  $G$  und  $r > 0$  konstruiere man den bipartiten Graphen  $G_r$  und stelle fest, ob dieser Graph eine Zuordnung mit  $r$  Kanten besitzt, genau dann gilt auch  $\rho(G) \leq r$ .

Der Graph  $G_r$  hat  $m + rn$  Ecken und  $2mr$  Kanten und eine maximale Zuordnung von  $G_r$  hat maximal  $m$  Kanten. Nach den Ergebnissen aus Abschnitt 9.1 kann eine maximale Zuordnung in einem bipartiten Graph mit Aufwand  $O(\sqrt{zm})$  bestimmt werden. Somit ist der Aufwand für das beschriebene Verfahren  $O(m^{3/2}r)$ . Da  $r \leq (n-1)/2$  ist, ist der Aufwand gleich  $O(m^{3/2}n)$ .

- (c) Mittels des in Teil (b) entwickelten Algorithmus in Kombination mit binärer Suche kann  $\rho(G)$  mit Aufwand  $O(\log_2 n(m^{3/2}n))$  bestimmt werden.

42. (a) Es sei  $O$  eine Orientierung von  $G$  mit der angegebenen Eigenschaft. Ist  $H$  ein Untergraph von  $G$ , dann gilt

$$m_H = \sum_{e \in E_H} g_H^+(e) \leq \sum_{e \in E_H} g_G^+(e) \leq rn_H$$

und somit ist  $m_H/n_H \leq r$ . Hieraus folgt  $\rho(G) \leq r$ .

Sei nun  $\rho(G) \leq r$ . Aus dem Beweis von Aufgabe 41 (b) folgt, dass  $G_r$  eine Zuordnung  $Z$  mit  $|Z| = m$  hat. Mittels  $Z$  kann eine Orientierung von  $G$  mit der gewünschten Eigenschaft konstruiert werden. Ist  $k$  eine Kante von  $G$  und wird  $k$  durch  $Z$  der Ecke  $u$  zugeordnet, so wird  $k$  in Richtung von  $u$  weg orientiert. Da  $u$  nur  $r$ -mal als Ecke in  $G_r$  vorkommt, hat die konstruierte Orientierung die geforderte Eigenschaft.

(b) Aus Teil (a) und der Lösung von Aufgabe 41 (c) ergibt sich sofort ein Algorithmus mit Aufwand  $O(\log_2 n(m^{3/2}n))$ .

43. (a) Für jede Ecke  $e$  von  $G$  muss  $g(e) \geq \theta(e)$  gelten, weiterhin muss folgende Gleichung erfüllt sein:

$$\sum_{i=1}^n \theta(e) = m.$$

(b) Beide Bedingungen sind nicht hinreichend. Hierzu betrachte man den Graphen  $K_4$  und die Funktion  $\theta(1) = \theta(2) = 0, \theta(3) = \theta(4) = 3$ .

(c) Definiere einen bipartiten Graphen  $G_\theta$  mit Eckenmenge  $E_1 \cup E_2$ , wobei  $E_1$  gleich der Kantenmenge von  $G$  ist und  $E_2$  enthält genau  $\theta(e)$  Kopien jeder Ecke  $e$  aus  $G$ . Eine Ecke  $(u, v) \in E_1$  ist zu den  $\theta(u)$  Kopien von  $u$  und zu den  $\theta(v)$  Kopien von  $v$  inzident, d. h., für  $x = (u, v) \in E_1$  gilt  $g(x) = \theta(u) + \theta(v)$ . Man zeigt nun leicht, dass  $G$  genau dann die gewünschte Orientierung besitzt, wenn  $G_\theta$  eine vollständige Zuordnung besitzt. Somit kann der in Abschnitt 9.1 vorgestellte Algorithmus verwendet werden.

44. Definiere für jede Kante  $k$  eine weitere Kantenbewertung  $c'(k) = m c(k) + 1$ . Es sei  $T$  ein bezüglich der Kantenbewertung  $c'$  ein minimaler Schnitt und  $X$  ein beliebiger Schnitt von  $G$ . Dann gilt:

$$\text{kosten}_{c'}(T) \leq \text{kosten}_{c'}(X).$$

Aus der Definition von  $c'$  ergibt sich folgende Ungleichung

$$m \text{kosten}_c(T) + |T| \leq m \text{kosten}_c(X) + |X|$$

Angenommen es gilt  $\text{kosten}_c(X) < \text{kosten}_c(T)$ . Da alle Kapazitäten ganzzahlig sind, gilt somit auch  $\text{kosten}_c(X) + 1 \leq \text{kosten}_c(T)$ . Hieraus folgt  $m + |T| \leq |X|$ , ein Widerspruch da  $|X| < m$  gilt. Somit ist  $T$  auch bezüglich der Kantenbewertung  $c$  ein minimaler Schnitt. Gilt  $\text{kosten}_c(X) = \text{kosten}_c(T)$ , so folgt aus obiger Ungleichung  $|T| \leq |X|$ , d. h.,  $T$  hat unter allen bezüglich der Kantenbewertung  $c$  minimalen Schnitten die wenigsten Kanten. Mittels des in Abschnitt 9.5 vorgestellten Algorithmus, angewendet auf die Bewertung  $c'$ , kann das beschriebene Problem mit Aufwand  $O(n m \log n)$  gelöst werden.

45. Es sei  $C$  eine Clique von  $G$ . Dann ist  $E \setminus C$  eine Eckenüberdeckung von  $\overline{G}$ . Ist  $U$  eine Eckenüberdeckung von  $\overline{G}$ , so ist  $E \setminus U$  eine Clique von  $G$ . Hieraus folgt  $\omega(G) = \tau(\overline{G})$ .
46. Ist eine Ecke  $e$  nicht in  $U$  enthalten, so müssen alle Nachbarn dieser Ecke in  $E$  enthalten sein (sonst sind die zu  $e$  inzidenten Kanten nicht überdeckt). Somit gilt  $e \in U$ , falls  $g(e) > |U|$  ist.
47. Da nach Aufgabe 26 aus Kapitel 4 die Blätter eines Tiefensuchebaums eine unabhängige Menge sind, bildet die Menge der inneren Ecken eine Eckenüberdeckung. Mittels des in Aufgabe 36 beschriebenen Algorithmus kann eine maximale Zuordnung  $M$  des Baumes bestimmt werden. Man überzeugt sich leicht, dass die erste Ecke, die der Algorithmus besucht, durch  $M$  überdeckt wird. Ferner wird auch jede innere Ecke außer der Wurzel durch  $M$  überdeckt. Somit gilt  $2|M| \geq |U|$ . Zur Überdeckung der Kanten aus  $M$  werden mindestens  $|M|$  Ecken benötigt, d. h.  $\tau(G) \geq |M|$ . Hieraus folgt die Behauptung.



# Kapitel 10 – Kürzeste Wege

1. Es sei  $S$  die Menge der von der Startecke  $s$  aus erreichbaren Ecken und  $G_S$  der von  $S$  induzierte Untergraph von  $G$ . Nach Voraussetzung hat  $G_S$  die Eigenschaft (\*). Eine Anwendung des Algorithmus von Moore und Ford auf  $G$  verwendet nur Ecken und Kanten aus  $G_S$ , d. h., beide Anwendungen sind identisch. Somit arbeitet der Algorithmus auch auf  $G$  korrekt.

2. Beispiele für kW-Bäume.

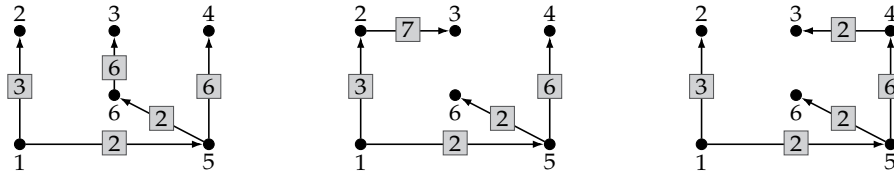

3. Der Graph besitzt keine geschlossenen Wege. Mit dem in Aufgabe 9 beschriebenen Verfahren können die kürzesten Wege in linearer Zeit bestimmt werden.
4. (a) Der kürzeste Weg von  $e$  durch eine vorgegebene dritte Ecke  $e_1$  nach  $e'$  besteht aus dem kürzesten Weg von  $e$  nach  $e_1$  gefolgt von dem kürzesten Weg von  $e_1$  nach  $e'$ .  
(b) Für  $i, j = 1, \dots, l$  mit  $i \neq j$  bestimme die kürzesten Wege von  $e$  nach  $e_i$ ,  $e_i$  nach  $e_j$  und von  $e_i$  nach  $e'$  (insgesamt  $l^2 + l$  Wege). Danach bestimme man unter allen  $l!$  Reihenfolgen der Ecken  $e_1, \dots, e_l$  den kürzesten der Wege  $\langle e, e_{i_1}, \dots, e_{i_l}, e' \rangle$ . Hierfür können die in Kapitel 5 beschriebenen Verfahren wie Branch & Bound oder Dynamische Programmierung verwendet werden.
5. Es sei  $B$  ein minimal aufspannender Baum von  $G$ ,  $(e, e')$  eine der  $n - 1$  Kanten von  $B$  und  $W$  ein kürzester Weg von  $e$  nach  $e'$  in  $G$ . Wäre die Länge von  $W$  kleiner als die Länge von  $(e, e')$ , so würde dies zu einem aufspannenden Baum mit geringeren Kosten als  $B$  führen. Somit ist  $(e, e')$  der kürzeste Weg von  $e$  nach  $e'$  in  $G$ .
6. Die folgende Abbildung zeigt den entstehenden kW-Baum und die kürzesten Entfernungen zur Startecke.

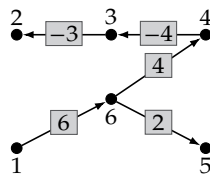

| Ecke       | $e_1$ | $e_2$ | $e_3$ | $e_4$ | $e_5$ | $e_6$ |
|------------|-------|-------|-------|-------|-------|-------|
| Entfernung | 0     | 3     | 6     | 10    | 8     | 6     |

7. Die Behauptung ist falsch. Dazu wird ein Graph mit sieben Ecken betrachtet. Der Graph ist die Vereinigung der beiden Graphen  $C_3$  und  $C_4$ . Die Kanten der ersten Zusammenhangskomponente tragen die Gewichte 25, 26 und 27 und die Kanten der zweiten Komponente die Gewichte 21, 22, 23 und 24.
8. Die Prozedur kürzesteWege aus Abbildung 10.6 muss wie folgt geändert werden.

```

var D : Array[1..n] von Real;
var vorgänger : Array[1..n] von Ecke;

procedure kürzesteWege(G : B-Graph, s : Ecke)
var e_i, e_j : Ecke;
var W : Warteschlange von Ecke;

```

```

Initialisiere D mit  $\infty$  und vorgänger mit  $\perp$  ;
D[G.index(s)] := 0;
W.einfügen(s);
while W  $\neq \emptyset$  do
    ei := W.entfernen();
    if not W.enthalten(vorgänger[i]) then
        foreach ej in N+(ei) do
            verkürze(ei, ej);

```

Es sei  $e_i$  die erste Ecke in der Warteschlange und  $e_j$  der momentane Vorgänger von  $e_i$  im kW-Baum. Dann wurde  $e_j$  nach  $e_i$  in die Warteschlange eingefügt, d. h., der aktuelle Wert von  $D[e_j]$  ist kleiner als zu dem Zeitpunkt, als  $D[e_i]$  zuletzt aktualisiert wurde. Somit ist der aktuelle Wert von  $D[e_i]$  zu hoch. Spätestens bei der Abarbeitung von  $e_j$  wird der Wert von  $D[e_i]$  erniedrigt und  $e_i$  erneut in die Warteschlange eingefügt. Somit ist es überflüssig, Ecke  $e_i$  vor ihrem aktuellen Vorgänger  $e_j$  zu bearbeiten. Die Korrektheit dieser Variante des Algorithmus von Moore und Ford ergibt sich aus dieser Beobachtung und der Korrektheit der Originalversion. Diese Variante hat in vielen Fällen eine geringere Laufzeit. Die *Worst-Case*-Komplexität bleibt aber unverändert. Dazu betrachte man die Folge von Graphen, welche durch die in Abbildung 10.8 angegebenen Adjazenzmatrizen  $M_n$  definiert ist. Der Algorithmus von Moore und Ford durchläuft die **while**-Schleife für diese Graphen  $1 + (n - 1)n/2$  mal.

9. In einem ersten Schritt wird eine topologische Sortierung des Graphen bestimmt. Die in Abbildung 10.5 dargestellte Prozedur `bellman` muss nur geringfügig abgeändert werden: Die Iteration über die Ecken erfolgt gemäß aufsteigenden Sortierungsnummern beginnend mit der Startecke.

Für den Korrektheitsbeweis des Algorithmus kann ohne Einschränkung der Allgemeinheit angenommen werden, dass die Ecken gemäß ihrer topologischen Sortierungsnummer nummeriert sind und dass die Startecke  $s$  die Sortierungsnummer 1 hat (d. h.  $s = e_1$ ). Die Korrektheit ergibt sich aus folgender Aussage: Nach dem Ende des  $i$ -ten Durchlaufs gilt  $D[j] = d(s, e_j)$  für  $j = 1, \dots, i+1$ . Diese Aussage wird mithilfe von vollständiger Induktion nach  $i$  bewiesen. Zu jedem Zeitpunkt gilt  $D[j] \geq d(s, e_j)$ . Da die zweite Ecke nur einen Vorgänger hat, gilt nach dem ersten Durchlauf  $D[j] = d(s, e_j)$  für  $j = 1, 2$ . Sei nun  $i > 1$ . Nach dem  $i - 1$ -ten Durchgang werden die Werte für  $D[1], \dots, D[i]$  nicht mehr geändert. Es muss also nur gezeigt werden, dass nach dem  $i$ -ten Durchgang  $D[i + 1] = d(s, e_{i+1})$  gilt. Es sei  $e_j$  der Vorgänger von  $e_{i+1}$  auf einem kürzesten Weg von  $s$  nach  $e_{i+1}$ . Dann gilt  $j < i + 1$  bzw.  $j \leq i$  und somit war  $D[j] = d(s, e_j)$  vor dem  $j$ -ten Durchgang. Nach dem  $j$ -ten Durchgang gilt:

$$D[i+1] \leq D[j] + B[j, i+1] = d(s, e_{i+1}).$$

Wegen  $d(s, e_{i+1}) \leq D[i + 1]$  gilt also  $D[i + 1] = d(s, e_{i+1})$  schon nach dem  $j$ -ten und somit erst recht nach dem  $i$ -ten Durchgang.

10. Es sei  $n$  eine ungerade Zahl und  $l = (n + 1)/2$ . Der unten dargestellte kantenbewertete gerichtete Graph mit  $n$  Ecken und  $3(n - 1)/2$  Kanten ist kreisfrei. Bei der Anwendung des Algorithmus von Moore und Ford auf diesen Graph werden die Nachfolger jeder Ecke in der Reihenfolge aufsteigender Eckennummern betrachtet. Für  $j = 1, \dots, l - 1$  gilt: Die Ecken  $e_j$  und  $e_{l+j}$  werden  $j$ -mal in die Warteschlange eingefügt. Somit ist die Laufzeit des Algorithmus für diesen Graph  $O(n^2)$ .

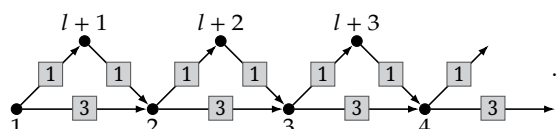



11. Die folgende Tabelle zeigt die Werte von F, min, D und vorgänger für die einzelnen Schritte.

| F           | min | D        |          |   |          |          |          |          |          | vorgänger |         |         |         |         |         |         |         |
|-------------|-----|----------|----------|---|----------|----------|----------|----------|----------|-----------|---------|---------|---------|---------|---------|---------|---------|
|             |     | 1        | 2        | 3 | 4        | 5        | 6        | 7        | 8        | 1         | 2       | 3       | 4       | 5       | 6       | 7       | 8       |
| 3           |     | $\infty$ | $\infty$ | 0 | $\infty$ | $\infty$ | $\infty$ | $\infty$ | $\infty$ | $\perp$   | $\perp$ | $\perp$ | $\perp$ | $\perp$ | $\perp$ | $\perp$ | $\perp$ |
| 2,4         | 3   | $\infty$ | 3        | 0 | 2        | $\infty$ | $\infty$ | $\infty$ | $\infty$ | $\perp$   | 3       | $\perp$ | 3       | $\perp$ | $\perp$ | $\perp$ | $\perp$ |
| 2,1,5       | 4   | 6        | 3        | 0 | 2        | 10       | $\infty$ | $\infty$ | $\infty$ | 4         | 3       | $\perp$ | 3       | 4       | $\perp$ | $\perp$ | $\perp$ |
| 1,5,8       | 2   | 4        | 3        | 0 | 2        | 10       | $\infty$ | $\infty$ | 7        | 2         | 3       | $\perp$ | 3       | 4       | $\perp$ | $\perp$ | 2       |
| 5,8         | 1   | 4        | 3        | 0 | 2        | 7        | $\infty$ | $\infty$ | 7        | 2         | 3       | $\perp$ | 3       | 1       | $\perp$ | $\perp$ | 2       |
| 8,6,7       | 5   | 4        | 3        | 0 | 2        | 7        | 13       | 12       | 7        | 2         | 3       | $\perp$ | 3       | 1       | 5       | 5       | 2       |
| 6,7         | 8   | 4        | 3        | 0 | 2        | 7        | 13       | 12       | 7        | 2         | 3       | $\perp$ | 3       | 1       | 5       | 5       | 2       |
| 6           | 7   | 4        | 3        | 0 | 2        | 7        | 13       | 12       | 7        | 2         | 3       | $\perp$ | 3       | 1       | 5       | 5       | 2       |
| $\emptyset$ | 6   | 4        | 3        | 0 | 2        | 7        | 13       | 12       | 7        | 2         | 3       | $\perp$ | 3       | 1       | 5       | 5       | 2       |

12. Der folgende Algorithmus basiert auf der Tiefensuche und hat eine Laufzeit von  $O(m)$ . Eine neue Ecke  $e_i$  wird nur dann besucht, wenn Sie nicht schon als besucht markiert ist und wenn die Entfernung im Tiefensuchebaum von der Startecke  $e$  mit  $d(e, e_i)$  übereinstimmt. Zum Beweis der Korrektheit der Prozedur kWBaum genügt es zu zeigen, dass alle Ecken erreicht werden. Es sei  $e'$  eine beliebige Ecke von  $G$  und  $W$  der Weg von der Startecke zu  $e'$  in einem beliebigen kW-Baum (da  $G$  die Eigenschaft  $(*)$  hat, muss es einen kW-Baum geben). Angenommen  $e'$  ist nicht in dem erzeugten Baum  $B$  enthalten. Es sei  $e_j$  die erste Ecke auf  $W$ , welche nicht in  $B$  ist. Dann ist der Vorgänger  $e_i$  von  $e_j$  auf  $W$  in  $B$  enthalten und es gilt  $d(e, e_j) = d(e, e_i) + B[e_i, e_j]$ . Beim Besuch von  $e_i$  durch aufbauen wird dann  $e_j$  besucht. Dieser Widerspruch zeigt, dass  $B$  ein kW-Baum ist.

```

var besucht : Array[1..n] von Boolean;
var vorgänger : Array[1..n] von Ecke;

procedure kWBaum(G : B-Graph, e : Ecke)
  Initialisiere besucht mit false und vorgänger mit  $\perp$ ;
  aufbauen(e, e);

procedure aufbauen(e_i : Ecke, e : Ecke)
  var e_j : Ecke;
  besucht[i] := true;
  foreach e_j in N(e_i) do
    if not besucht[j] and  $d(e, e_j) = d(e, e_i) + B[i, j]$  then
      vorgänger[j] := e_i;
      aufbauen(e_j, e);

```

13. Da  $G$  die Eigenschaft  $(*)$  erfüllt, gilt das Optimalitätsprinzip. Dann ist der Teilweg  $W_1$  von  $e'_i$  nach  $e_j$  auf  $W$  ein kürzester Weg von  $e'_i$  nach  $e_j$ . Für  $W_1$  gilt wieder das Optimalitätsprinzip, somit gilt  $L(\overline{W}) = d(e'_i, e'_j)$ , d. h.,  $\overline{W}$  ist ein kürzester Weg.
14. Es seien  $a$  und  $b$  positive reelle Zahlen. Dann gilt:  $ab = 1/e^{-\log a - \log b}$ . Da die e-Funktion monoton steigend ist, ist das Produkt  $ab$  umso größer, umso kleiner  $-\log a - \log b$  ist. Für  $a \in [0, 1]$  ist  $-\log a > 0$ . Ändert man die Bewertung jeder Kante von  $b_{ij}$  auf  $-\log b_{ij}$ , so kann der Algorithmus von Dijkstra angewendet werden. Dann entsprechen die kürzesten Wege bezüglich der neuen Bewertung den Wegen, bei denen das Produkt der einzelnen Wahrscheinlichkeiten maximal ist.
- Der Übertragungsweg von Sender 1 zum Empfänger 5 mit der größten Wahrscheinlichkeit einer korrekten Übertragung ist 1, 8, 9, 3, 4, 5. Die Übertragungswahrscheinlichkeit ist 0,40824.
15. Ohne Einschränkung der Allgemeinheit kann man annehmen, dass alle Kanten die Bewertung 1 haben (vergleichen Sie Aufgabe 23). Eine in Abschnitt 10.2 bewiesene Folgerung des Optimalitäts-

prinzip ist: Für alle Kanten  $(e, e')$  gilt:

$$d(s, e') \leq d(s, e) + B[e, e'].$$

Die Aussage der Aufgabe folgt nun aus Aufgabe 24 in Kapitel 4.

16. Die folgende Tabelle zeigt die Werte von D und vorgänger für einen kW-Baum mit Startecke  $e_1$ .

| D |   |   |   |   | vorgänger |   |   |   |   |
|---|---|---|---|---|-----------|---|---|---|---|
| 1 | 2 | 3 | 4 | 5 | 1         | 2 | 3 | 4 | 5 |
| 0 | 3 | 7 | 4 | 3 | 0         | 1 | 2 | 3 | 4 |

17. Der Korrektheitsbeweis für diese Version des Algorithmus von Moore und Ford folgt dem Originalbeweis aus Abschnitt 10.3. Untersuchungen haben gezeigt, dass diese Variante in vielen Fällen eine geringere Laufzeit aufweist. Wendet man den neuen Algorithmus auf die Folge von Graphen an, welche durch die in Abbildung 10.8 angegebenen Adjazenzmatrizen  $M_n$  definiert ist, so stellt man allerdings fest, dass die Anzahl der Ausführungen der **while**-Schleife unverändert ist.
18. Vergleichen Sie hierzu Abschnitt 10.4.4. Sind die Kantenbewertungen reelle Zahlen, so haben die Ecken innerhalb eines Faches nicht unbedingt die gleichen Werte. Dies erhöht die Zugriffszeit und die in Abschnitt 10.4.4 angegebenen Laufzeiten werden nicht erreicht. Entscheidend ist die Verteilung der Ecken auf die Fächer. Je gleichmäßiger die Verteilung ist, desto größer ist der Vorteil von Bucket-Sort.
19. Es wird ein neuer Graph  $G'$  mit gleicher Ecken- und Kantenmenge gebildet. Die Kanten  $(e, e')$  von  $G'$  tragen die Bewertung  $B'[e, e'] = B[e, e'] + (B[e] + B[e'])/2$ . Genau dann ist  $W$  ein kürzester Weg von  $s$  nach  $z$  in  $G'$  bezüglich  $B'$ , wenn  $W$  ein kürzester Weg von  $s$  nach  $z$  in  $G$  bezüglich  $B$  ist. Die Länge von  $W$  in  $G$  ist gleich  $L'(W) - (B[s] + B[z])/2$ , wobei  $L'(W)$  die Länge von  $W$  in  $G'$  ist.
20. Die rot gezeichneten Kanten bilden einen kW-Baum für Ecke  $e_1$ , aber keinen minimal aufspannenden Baum.

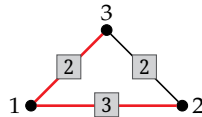

21. (a) Distanz- und Vorgängermatrix des Graphen aus Aufgabe 6:

$$D = \begin{pmatrix} 0 & 3 & 6 & 10 & 8 & 6 \\ \infty & 0 & \infty & \infty & \infty & \infty \\ \infty & -3 & 0 & 5 & 3 & 1 \\ \infty & -7 & -4 & 0 & -1 & -3 \\ \infty & -5 & -2 & 2 & 0 & -1 \\ \infty & -3 & 0 & 4 & 2 & 0 \end{pmatrix} \quad V = \begin{pmatrix} 0 & 3 & 4 & 6 & 6 & 1 \\ 0 & 0 & 0 & 0 & 0 & 0 \\ 0 & 3 & 0 & 5 & 6 & 3 \\ 0 & 3 & 4 & 0 & 6 & 3 \\ 0 & 3 & 4 & 5 & 0 & 3 \\ 0 & 2 & 4 & 6 & 6 & 0 \end{pmatrix}$$

- (b) Die Werte für die Kantenbewertung  $B'$  sind:  $b_{12} = 11$ ,  $b_{15} = 10$ ,  $b_{16} = 9$ ,  $b_{32} = 0$ ,  $b_{36} = 0$ ,  $b_{43} = 0$ ,  $b_{54} = 1$ ,  $b_{64} = 1$ ,  $b_{65} = 0$ .

22. Zunächst wird der Abstand zwischen allen Paaren von Orten bestimmt. Danach wird für jeden Ort die weiteste Entfernung bestimmt (größter Wert in der entsprechenden Zeile der Distanzmatrix) und der Ort mit der kleinsten weitesten Entfernung ausgewählt. In diesem Fall ist es Ort 2 mit einer maximalen Entfernung von 180. Im Folgenden ist die Distanzmatrix dargestellt. Die weitesten Wegstrecken für die einzelnen Orte sind eingerahmt.

$$D = \begin{pmatrix} 0 & 100 & 250 & 280 & 140 & 260 \\ 100 & 0 & 150 & 180 & 40 & 160 \\ 250 & 150 & 0 & 30 & 190 & 70 \\ 280 & 180 & 30 & 0 & 220 & 100 \\ 140 & 40 & 190 & 220 & 0 & 120 \\ 260 & 160 & 70 & 100 & 120 & 0 \end{pmatrix}$$

23. Es sei  $W$  ein Weg bestehend aus  $l$  Kanten,  $L(W)$  bzw.  $L'(W)$  bezeichne die Länge von  $W$  vor bzw. nach der Erhöhung um  $c$ . Im ersten Fall gilt  $L'(W) = L(W) + lc$  und im zweiten Fall  $L'(W) = cL(W)$ . Im zweiten Fall bleiben die kürzesten Wege die gleichen.
24. Der Graph hat die Eigenschaft (\*): Jeder geschlossene Weg hat mindestens eine Kante mit Bewertung 64, da alle Kanten  $(e_i, e_j)$  mit  $i < j$  die Bewertung 64 haben. Der kW-Baum mit Startecke  $e_1$  ist der Weg  $\langle e_1, e_6, e_5, e_4, e_3, e_2 \rangle$  und die Längen der kürzesten Wege sind 64, 47, 38, 33, 30. Die **while**-Schleife wird 16 mal ausgeführt.
25. Die Werte für die Kantenbewertung  $B'$  sind:  $b_{12} = 0$ ,  $b_{14} = 4$ ,  $b_{23} = 2$ ,  $b_{31} = 1$ ,  $b_{34} = 0$ ,  $b_{45} = 0$ ,  $b_{51} = 0$ .
26. Der Graph hat nicht die Eigenschaft (\*), der geschlossene Weg  $\langle e_6, e_5, e_3 \rangle$  hat die Länge  $-1$ . Wendet man die Prozedur **floyd** an, so wird der Diagonaleintrag  $D[6, 6]$  im vorletzten Durchgang negativ.
27. Mithilfe der Tiefensuche wird für jede Ecke  $e_i$  die Länge  $d_B(e, e_i)$  des kürzesten Weges von  $e$  nach  $e_i$  in  $B$  bestimmt (Aufwand  $O(n)$ ). Nach den Ergebnissen aus Abschnitt 10.2 ist  $B$  genau dann ein kW-Baum, wenn für jede Kante  $(e_i, e_j)$  von  $G$  die Ungleichungen  $d_B(e, e_i) + B[e_i, e_j] \geq d_B(e, e_j)$  und  $d_B(e, e_j) + B[e_i, e_j] \geq d_B(e, e_i)$  erfüllt sind. Dies kann mit Aufwand  $O(m)$  überprüft werden.
28. Falls es einen geschlossenen Weg  $W$  mit negativer Länge gibt, so gibt es eine Ecke  $e_s$  auf  $W$ , sodass alle in  $e_s$  startenden Teilwege von  $W$  negative Länge haben. Die Funktion **negativerKreis** überprüft die Existenz eines solchen geschlossenen Weges für eine gegebene Ecke  $e_s$ . Wird ein solcher Weg gefunden, so wird die Funktion beendet. Der Graph hat dann nicht die Eigenschaft (\*). In der Funktion **sternEigenschaft** wird diese Funktion für jede Ecke aufgerufen. Gibt es für keine Ecke des Graphen einen solchen Weg, so erfüllt der Graph die Eigenschaft (\*).

```
function sternEigenschaft(G : B-Graph) : Boolean
    foreach  $e_i$  in G.E do
        if negativerKreis( $e_i$ ,  $e_i$ , 0) then
            return false;
    return true;

function negativerKreis( $e_s$  : Ecke,  $e_i$  : Ecke, länge : Integer) : Boolean
    foreach  $e_j$  in  $N^+(e_i)$  do
        if länge + B[i, j] < 0 then
            if  $e_j = e_s$  then
                return true;
            else
                negativerKreis( $e_s$ ,  $e_j$ , länge + B[i, j]);
    return false;
```

29. Die folgende Tabelle zeigt die Werte von  $D$  und Vorgänger für einen LW-Baum (längste Wege Baum) mit Startecke  $e_1$ .

| D |   |    |    |   |    | vorgänger |   |   |   |   |   |
|---|---|----|----|---|----|-----------|---|---|---|---|---|
| 1 | 2 | 3  | 4  | 5 | 6  | 1         | 2 | 3 | 4 | 5 | 6 |
| 0 | 1 | -9 | -3 | 3 | -7 | 0         | 1 | 4 | 2 | 4 | 3 |

30. Die **if**-Anweisung in der Prozedur `floyd` aus Abbildung 10.25 muss wie folgt abgeändert werden.

```

if  $\max(D[i, j], D[j, k]) < \infty$  and  $D[i, k] > \min(D[i, j], D[j, k])$  then
     $D[i, k] := \min(D[i, j], D[j, k]);$ 
     $V[i, k] := V[j, k];$ 

```

31. Da  $f_1$  und  $f_2$  konsistent sind, gilt  $0 \leq f_i(e) \leq B[e, e'] + f_i(e')$  für  $i = 1, 2$  und jede Kante  $(e, e')$ . Multipliziert man die erste Ungleichung mit  $a$  und die zweite mit  $b$  und addiert diese dann, so erhält man:

$$0 \leq af_1(e) + bf_2(e) \leq (a + b)B[e, e'] + af_1(e') + bf_2(e').$$

Dividiert man diese Ungleichung durch  $a + b$ , so folgt die Konsistenz von  $(af_1 + bf_2)/(a + b)$ .

32. Für einen beliebigen Brettzustand  $b$  und einen Zielzustand  $z$  sei

$f_1(b)$  die Anzahl der Plättchen, welche in  $b$  eine andere Position als in  $z$  haben;

$f_2(b)$  die Summe der für jedes Plättchen von  $b$  (ohne Beachtung der anderen Plättchen) mindestens notwendigen Verschiebungen, um die Position in  $z$  zu erreichen.

Für die in Abbildung 4.28 dargestellte Startstellung  $s$  gilt  $f_1(s) = 8$  und  $f_2(s) = 13$ . Sowohl  $f_1$  als auch  $f_2$  sind zulässig. Beide Schätzfunktionen können mithilfe von Metriken auf dem Raum  $Z \times Z$  definiert werden: für  $a, b$  aus  $Z \times Z$  sei  $d_1(a, b) = 0$ , falls  $a = b$ , und 1, falls  $a \neq b$  und  $d_2(a, b) = |a_x - b_x| + |a_y - b_y|$ . Bezeichnet man mit  $P_a(i)$  die Position von Plättchen  $i$  im Zustand  $a$ , so gilt

$$f_i(a) = d_i(P_a(1), P_z(1)) + \dots + d_i(P_a(8), P_z(8))$$

für  $i = 1, 2$ . Aus der Dreiecksungleichung für  $d_1$  und  $d_2$  folgt:

$$f_i(a) - f_i(b) = \sum_{j=1}^8 d_i(P_a(j), P_z(j)) - d_i(P_b(j), P_z(j)) \leq \sum_{j=1}^8 d_i(P_a(j), P_b(j)).$$

Da die rechte Seite dieser Ungleichung höchstens so groß ist, wie die minimale Anzahl von Verschiebungen, um Zustand  $b$  von Zustand  $a$  aus zu erreichen, sind  $f_1$  und  $f_2$  konsistent. Wegen  $f_1(a) \leq f_2(a)$  wird das Ziel mithilfe der zweiten Schätzfunktion im Allgemeinen schneller gefunden.

33. Startend mit dem trivialen Fluss  $f_0$  werden mithilfe von Erweiterungswegen minimaler Kosten neue kostenminimale Flüsse  $f_i$  bestimmt. Dazu beachte man, dass der triviale Fluss ein Fluss mit Wert 0 und minimalen Kosten ist. Einen Erweiterungsweg mit minimalen Kosten findet man mit dem Algorithmus von Moore und Ford. Dieser Algorithmus ist anwendbar, da es in den Graphen  $G_{f_i}$  nach Teil (a) des Satzes aus Abschnitt 8.7 auf Seite 255 keine geschlossenen Wege negativer Länge gibt. Das Verfahren wird beendet, sobald Ecke  $s$  in  $G_{f_i}$  nicht mehr von  $q$  aus erreichbar ist. Dann liegt ein maximaler Fluss mit minimalen Kosten vor. Da alle Kapazitäten ganzzahlig sind, gilt  $|f_{i+1}| \geq |f_i| + 1$ , d. h., der Algorithmus terminiert nach maximal  $|f_{\max}|$  Durchgängen. Unter Verwendung des Algorithmus von Moore und Ford ergibt sich eine Laufzeit von  $O(|f_{\max}|nm)$ .
34. Der in Abbildung 10.9 dargestellte Algorithmus von Dijkstra expandiert immer die Ecke aus dem kW-Baum, welche aktuell den kürzesten Abstand zur Startecke hat. Zur Lösung der gestellten Aufgabe muss die Ordnung auf den Ecken des kW-Baumes neu definiert werden. Ist die Entfernung

zweier Ecken zur Startecke gleich, so wird die Ecke, bei der der Weg von der Startecke weniger Kanten enthält, als kleiner angesehen. Hierzu wird neben der eigentlichen Entfernung zur Startecke auch die Anzahl der Kanten des Weges im kW-Baum in einem Feld `kantenAnzahl` gespeichert. Dieses Feld wird mit  $\infty$  initialisiert. Die Funktion `verkürze` muss wie folgt geändert werden.

```
function verkürze( $e_i$  : Ecke,  $e_j$  : Ecke) : Boolean
  if  $D[i] + B[i, j] < D[j]$  then
     $D[j] := D[i] + B[i, j]$ ;
     $vorgänger[j] := e_i$ ;
     $kantenAnzahl[j] := kantenAnzahl[i] + 1$ ;
    return true;
  else
    if  $D[i] + B[i, j] = D[j]$  then
      if  $kantenAnzahl[j] > kantenAnzahl[i] + 1$  then
         $vorgänger[j] := e_i$ ;
         $kantenAnzahl[j] := kantenAnzahl[i] + 1$ ;
        return true;
    return false;
```

Die Implementierung des Algorithmus von Dijkstra wird an zwei Stellen geändert. Die Auswahl einer Ecke aus  $F$  erfolgt gemäß der neuen Ordnung und beim Einfügen einer Ecke in  $F$  wird das Feld `kantenAnzahl` auf 1 gesetzt.

35. Es sei  $e_1 = (a_1, \dots, a_s)$  die Start- und  $e_2 = (b_1, \dots, b_s)$  die Zielecke. Für eine beliebige Ecke  $e$  von  $Q_s$  sei  $e(i)$  die Ecke, welche sich von  $e$  genau an der  $i$ -ten Position unterscheidet.

```
for  $i := 1$  to  $n$  do
  if  $a_i \neq b_i$  then
    Schicke Nachricht von  $e$  nach  $e(i)$ ;
     $e := e(i)$ ;
```

36. Nach dem die Breitensuche für eine Ecke  $s$  durchgeführt worden ist, enthält das Feld `niveau` die Längen der kürzesten Wege von  $s$  zu allen anderen Ecken. Somit genügt es, die Werte des Feldes `niveau` zu summieren.

```
 $C_C := 0$ ;
foreach  $e_i$  in  $G.E$  do
   $C_C := C_C + niveau[i]$ ;
return  $C_C / (n - 1)$ ;
```



# Kapitel 11 – Approximative Algorithmen

1. (a) Ohne Einschränkung der Allgemeinheit kann angenommen werden, dass nach der Zuordnung der Programme zu Prozessoren Prozessor  $P_1$  die höchste Last hat. Bezeichne mit  $T$  die Gesamtlaufzeit aller  $P_1$  zugeordneter Programme. Das zuletzt an  $P_1$  zugeordnete Programm habe die Laufzeit  $t_j$ . Da Programm  $j$  als letztes zugeordnet wurde, hat jeder Prozessor mindestens eine Laufzeit von  $T - t_j$ . Hieraus folgt:

$$\sum_{i=1}^n t_i \geq m(T - t_j) + t_j.$$

Ferner ist  $\mathcal{A}(n) = T$  und somit gilt

$$OPT(n) \geq \frac{\sum_{i=1}^n t_i}{m} \geq (T - t_j) + \frac{t_j}{m} = \mathcal{A}(n) - (1 - \frac{1}{m})t_j.$$

Wegen  $t_j \leq OPT(n)$  folgt

$$\mathcal{A}(n) \leq OPT(n) + (1 - \frac{1}{m})t_j \leq OPT(n)(2 - \frac{1}{m}).$$

Hieraus ergibt sich die Behauptung.

- (b) Die Lasten der einzelnen Prozessoren werden in einem Heap verwaltet. In jedem Schritt wird der Prozessor mit der geringsten Last ausgewählt und die Last dieses Prozessors wird um die Laufzeit des aktuellen Programms erhöht. Dieser Schritt hat den Aufwand  $O(\log m)$ . Für alle  $n$  Programme ergibt sich zusammen der Aufwand  $O(n \log m)$ .
- (c) Es sei  $n = m(m - 1) + 1$ , die ersten  $n - 1$  Programme haben die Laufzeit 1 und das letzte Programm die Laufzeit  $m$ . Hieraus folgt  $\mathcal{A}(n) = 2m - 1$  und  $OPT(n) = m$ . Somit ist  $\mathcal{W}_{\mathcal{A}}(n) \leq 2 - \frac{1}{m}$ .
- (d) Da das zuletzt zugeordnete Programm die kürzeste Laufzeit hat, gilt

$$t_j \leq \frac{\sum_{i=1}^n t_i}{n} \leq \frac{m}{n} OPT(n).$$

Hieraus folgt

$$\mathcal{W}_{\mathcal{A}}(n) \leq 1 + \frac{m}{n}(1 - \frac{1}{m}).$$

Wegen  $n > m$  wird also der Wirkungsgrad verbessert. Mit einer genaueren Analyse kann gezeigt werden, dass  $\mathcal{W}_{\mathcal{A}}(n) \leq \frac{4}{3} - \frac{1}{3m}$  gilt.

2. (a) Es sei  $G$  ein Graph, der entsteht, wenn die Wurzel eines Baumes der Höhe 1 und  $s + 1$  Ecken mit einer beliebigen Ecke des vollständigen Graphen  $K_s$  verbunden wird.  $G$  hat  $2s + 1$  Ecken und  $\omega(G) = s$ . Die Wurzel des Baumes hat in  $G$  maximalen Eckengrad. Entfernt man diese und alle nicht zu ihr benachbarten Ecken, so verbleiben  $s + 1$  isolierte Ecken. Somit erzeugt  $\mathcal{A}_{C1}$  eine Clique der Größe 2 und es gilt  $OPT(G)/\mathcal{A}_{C1}(G) = s/2 = (n-1)/4$  bzw.  $\mathcal{W}_{\mathcal{A}_{C1}}^{\infty} = \infty$ .
- (b) Es sei  $G$  ein Graph  $G$ , der entsteht, wenn eine beliebige Ecke aus dem vollständigen Graphen  $K_s$  mit einer beliebigen Ecke aus dem vollständig bipartiten Graphen  $K_{s,s}$  verbunden wird.  $G$  hat  $3s$  Ecken und  $\omega(G) = s$ . In  $K_s$  gibt es  $s - 1$  Ecken mit Eckengrad  $s - 1$ , diese werden von  $\mathcal{A}_{C2}$  als Erstes aus  $G$  entfernt. Somit erzeugt  $\mathcal{A}_{C2}$  eine Clique der Größe 2 und es gilt  $OPT(G)/\mathcal{A}_{C2}(G) = s/2 = n/6$  bzw.  $\mathcal{W}_{\mathcal{A}_{C2}}^{\infty} = \infty$ .
3. In Kapitel 6 wurde gezeigt, dass die Größe einer maximalen Clique  $\omega(G)$  gleich der Größe einer maximalen unabhängigen Menge  $\alpha(\overline{G})$  des Komplements des Graphen ist. Somit ergibt sich aus

jedem approximativen Algorithmus für das Optimierungsproblem von Cliques direkt ein approximativer Algorithmus für das Optimierungsproblem der unabhängigen Menge mit gleichem Wirkungsgrad. Die in der Aufgabe gemachte Aussage folgt nun direkt aus dem Satz aus Abschnitt 11.5.4 auf Seite 376.

4. Ein Erweiterungsweg bezüglich einer Zuordnung  $Z$  ist ein Weg, der bei einer nicht zugeordneten Ecke beginnt und endet und bei dem jede zweite Kante nicht in  $Z$  enthalten ist. Mithilfe eines Erweiterungsweges  $W$  kann eine gegebene Zuordnung vergrößert werden. Hierzu werden aus  $Z$  alle Kanten entfernt, welche auf  $W$  liegen. Die restlichen Kanten von  $W$  werden in  $Z$  eingefügt. Die so entstandene Zuordnung enthält eine Kante mehr als die ursprüngliche Zuordnung. Zum Beweis der Aussage in der Aufgabe wird der Graph  $G'$  betrachtet. Da die Kanten von  $G'$  aus zwei Zuordnungen stammen, ist der Eckengrad jeder Ecke von  $G'$  kleiner oder gleich 2. Es sei  $H$  eine Zusammenhangskomponente von  $G'$ .  $H$  ist entweder eine isolierte Ecke, ein einfacher, geschlossener Weg mit der gleichen Anzahl von Kanten aus  $Z_1$  und  $Z_2$  oder ein offener einfacher Weg, dessen Kanten abwechselnd aus  $Z_1$  und  $Z_2$  stammen. Komponenten vom letzten Typ mit einer ungeraden Anzahl von Kanten sind entweder Erweiterungswege bezüglich  $Z_1$  oder  $Z_2$  (je nachdem ob mehr Kanten aus  $Z_2$  oder  $Z_1$  stammen). Da alle Kanten aus  $Z_1$  und  $Z_2$  auf die Zusammenhangskomponenten verteilt sind, muss es  $|Z_2| - |Z_1|$  Komponenten vom letzten Typ geben, bei denen die Mehrzahl der Kanten aus  $Z_2$  kommt. Dies sind alles eckendisjunkte Erweiterungswege bezüglich  $Z_1$ .
5. Die folgende Funktion `greedyZuordnung` erzeugt offensichtlich eine nicht erweiterbare Zuordnung  $Z$  von  $G$ .

```
function greedyZuordnung(G : Graph) : Menge von Kante
  var Z : Menge von Kante;
  var ei, ej : Ecke;
  var k : Kante;

  foreach ei in G.E do
    if es gibt Kante k = (ei, ej), welche zu keiner Kante aus Z inzident ist then
      Z.einfügen(k);
  return Z;
```

Es sei  $M$  eine maximale Zuordnung von  $G$ . Dann gibt es nach der letzten Aufgabe  $|M| - |Z|$  eckendisjunkte Erweiterungswege bezüglich  $Z$ . Nach Konstruktion enthält jeder dieser Erweiterungswege mindestens zwei Kanten aus  $M$ . Da die Wege eckendisjunkt sind, ist  $|M| - |Z| \leq |M|/2$  bzw.  $2|Z| \geq |M|$ . Hieraus folgt, dass der Wirkungsgrad des angegebenen Algorithmus kleiner oder gleich 2 ist.

Es sei  $l$  eine gerade Zahl und  $G_l$  ein bipartiter Graph mit Eckenmenge

$$E = \{a_1, \dots, a_l\} \cup \{b_1, \dots, b_l\}$$

und Kantenmenge

$$K = \{(a_i, b_i) \mid i = 1, \dots, l\} \cup \{(a_i, b_{i+1}) \mid i = 1, 3, 5, \dots, l-1\} \\ \cup \{(a_i, b_{i-1}) \mid i = 3, 5, \dots, l-1\}.$$

Die Kanten  $\{(a_i, b_i) \mid i = 1, \dots, l\}$  bilden eine maximale Zuordnung mit  $l$  Kanten. Die Kanten  $\{(a_i, b_{i+1}) \mid i = 1, 3, 5, \dots, l-1\}$  bilden eine Zuordnung, die durch die Funktion `greedyZuordnung` bestimmt wurden. Somit gilt

$$OPT(G_l)/A(G_l) = l/2l = 2,$$

d. h., der asymptotische Wirkungsgrad ist 2. Ist die von `greedyZuordnung` generierte Zuordnung  $Z$  nicht vollständig, dann gibt es eine nicht zugeordnete Ecke  $e$ . Es folgt, dass alle Nachbarn von



$e$  (dies sind mindestens  $\delta(G)$  Ecken) durch  $Z$  abgedeckt sind. Somit muss  $Z$  mindestens  $\delta(G)$  Kanten enthalten.

In der folgenden Implementierung von `greedyZuordnung` werden die Nachbarn jeder Ecke genau einmal betrachtet, deshalb ist die Worst-Case-Laufzeit gleich  $O(n + m)$ . Die Endecken der Kanten der Zuordnung können in linearer Zeit aus dem Feld `zuordnung` entnommen werden.

```
var zuordnung : Array[1..n] von Integer;
```

```
procedure greedyZuordnung(G : Graph)
```

```
  var  $e_i, e_j$  : Ecke;
```

```
  Initialisiere zuordnung mit  $\perp$ ;
```

```
  foreach  $e_i$  in G.E do
```

```
    if zuordnung[i] =  $\perp$  then
```

```
      foreach  $e_j$  in  $N(e_i)$  do
```

```
        if zuordnung[j] =  $\perp$  then
```

```
          zuordnung[i] :=  $e_j$ ;
```

```
          zuordnung[j] :=  $e_i$ ;
```

```
          break;
```

6. Der Algorithmus aus der letzten Aufgabe hat für das vorgegebene Problem die Worst-Case-Laufzeit  $O(n + \overline{m})$ , wobei  $\overline{m}$  die Anzahl der Kanten von  $\overline{G}$  ist. Der folgende Algorithmus ist ebenfalls ein Greedy-Algorithmus, d. h., die Aussage über den Wirkungsgrad bleibt gültig. Er verwendet eine verkettete Liste zur effizienten Iteration über die Menge der noch nicht zugeordneten Ecken.

```
var zuordnung : Array[1..n] von Ecke;
```

```
procedure greedyZuordnung(G : Graph)
```

```
  var nachbarn : Array[1..n] von Boolean;
```

```
  var unbedeckt : Liste von Ecke;
```

```
  var  $e_i, e_j$  : Ecke;
```

```
  Initialisiere zuordnung mit  $\perp$  und nachbarn mit false;
```

```
  Füge alle Ecken von G in unbedeckt ein;
```

```
  while unbedeckt  $\neq \emptyset$  do
```

```
     $e_i$  := unbedeckt.entfernen();
```

```
    foreach  $e_j$  in  $N(e_i)$  do
```

```
      nachbarn[j] := true;
```

```
    foreach  $e_j$  in unbedeckt do
```

```
      if not nachbarn[j] then
```

```
        unbedeckt.entferne( $e_j$ );
```

```
        zuordnung[i] :=  $e_j$ ;
```

```
        zuordnung[j] :=  $e_i$ ;
```

```
        break;
```

```
    foreach  $e_j$  in  $N(e_i)$  do
```

```
      nachbarn[j] := false;
```

Für die Analyse der Laufzeit beachte man, dass jede der drei **for**-Schleifen innerhalb der **while**-Schleife den Aufwand  $O(g(e_i))$  hat. Hieraus ergibt sich, dass der Algorithmus lineare Laufzeit  $O(n + m)$  hat.

7. Nach Aufruf der Prozedur aus Aufgabe 5 werden die  $z$  Kanten der Zuordnung  $Z$  der Reihe nach betrachtet. Gibt es für die Endecken einer Kante  $(e_i, e_j)$  nicht zugeordnete Nachbarn  $e'_i$  und  $e'_j$  mit  $e'_i \neq e'_j$ , so wird  $(e_i, e_j)$  aus  $Z$  entfernt und die beiden neuen Kanten  $(e'_i, e_i)$  und  $(e'_j, e_j)$  werden in  $Z$  eingefügt. Man überzeugt sich schnell, dass nach Betrachtung der  $z$  Kanten jeder Erweiterungsweg bezüglich  $Z$  aus mindestens fünf Kanten besteht (drei davon gehören nicht zu  $Z$ ). Die Laufzeit des Verfahrens bleibt weiterhin linear.

Es sei  $M$  eine maximale Zuordnung von  $G$ . Dann gibt es nach der vorletzten Aufgabe  $|M| - |Z|$  eckendisjunkte Erweiterungswege bezüglich  $Z$ . Nach Konstruktion enthält jeder dieser Erweiterungswege mindestens drei Kanten aus  $M$ . Da die Wege eckendisjunkt sind, ist  $|M| - |Z| \leq |M|/3$  bzw.  $3|Z| \geq 2|M|$ . Somit ist der Wirkungsgrad des Algorithmus kleiner oder gleich  $3/2$ .

Es sei  $l$  eine durch 3 teilbare Zahl und  $G_l$  ein bipartiter Graph mit Eckenmenge

$$E = \{a_1, \dots, a_l\} \cup \{b_1, \dots, b_l\}$$

und Kantenmenge

$$K = \{(a_i, b_i) \mid i = 1, \dots, l\} \cup \{(a_i, b_{i+1}) \mid 1 \leq i < l, i \text{ nicht durch 3 teilbar}\} \\ \cup \{(b_i, a_{i+1}) \mid 1 \leq i < l, i \text{ durch 3 teilbar}\}.$$

Die Kanten  $\{(a_i, b_i) \mid i = 1, \dots, l\}$  bilden eine maximale Zuordnung mit  $l$  Kanten. Die Kanten  $\{(a_i, b_{i+1}) \mid 1 \leq i < l, i \text{ nicht durch 3 teilbar}\}$  bilden eine Zuordnung, die durch den Algorithmus bestimmt wurde. Somit gilt

$$OPT(G_l)/A(G_l) = l/(2/3)l = 3/2$$

und der asymptotische Wirkungsgrad ist gleich  $3/2$ .

8. (a) Angenommen es gibt eine Ecke  $e$  von  $G$ , welche nicht in  $M$  liegt und auch zu keiner Ecke aus  $M$  benachbart ist. Wegen  $e \notin M$  sind alle Nachbarn von  $e$  untereinander benachbart, somit ist der von  $N[e]$  induzierte Untergraph vollständig. Da  $G$  zusammenhängend aber nicht vollständig ist, gibt es eine Ecke  $a$  außerhalb von  $N[e]$  die zu einer Ecke  $b$  aus  $N[e]$  benachbart ist. Aus der Definition von  $M$  folgt, dass  $b$  in  $M$  liegt. Dieser Widerspruch zeigt, dass  $M$  eine dominierende Menge ist.

Es seien  $e, e' \in M$  und  $W$  ein kürzester Weg zwischen  $e$  und  $e'$  in  $G$ . Angenommen es gibt auf  $W$  eine Ecke  $e''$  mit  $e'' \notin M$ . Da  $P$  ein kürzester Weg ist, sind die beiden Nachbarn von  $e''$  auf  $W$  nicht benachbart (sonst gäbe es einen kürzeren Weg). Somit liegt  $e''$  nach Definition in  $M$ . Dieser Widerspruch zeigt, dass  $M$  eine zusammenhängende dominierende Menge für  $G$  ist.

- (b) Es seien  $e, e'$  beliebige Ecken von  $G$  und  $W$  ein kürzester Weg zwischen  $e$  und  $e'$ . Angenommen es gibt auf  $W$  eine innere Ecke  $e''$  mit  $e'' \notin M$ . Da  $P$  ein kürzester Weg ist, sind die beiden Nachbarn von  $e''$  auf  $P$  nicht benachbart (sonst gäbe es einen kürzeren Weg). Somit liegt  $e''$  nach Definition in  $M$ . Dieser Widerspruch zeigt die Gültigkeit der Aussage.

- (c) Der folgende einfache Algorithmus bestimmt  $M$  mit Aufwand  $O(nm)$ .

```
foreach (e, e') in G.K do
  foreach e_i in G.E \ {e, e'} do
    if e_i ∈ N(e) then
      if e_i ∉ N(e') then
        M.einfügen(e);
    else
      if e_i ∈ N(e') then
        M.einfügen(e);
```

Der nächste Algorithmus bestimmt  $M$  mit Aufwand  $O(\sum_{i=1}^n g(i)^2) = O(m\Delta)$ .

```
var Boolean : fertig;

foreach e in G.E do
  fertig := false;
  foreach e_i in N(e) do
    if fertig then
```

```

    break;
foreach  $e_j$  in  $N(e) \setminus \{e_i\}$  do
    if  $e_i \notin N(e_j)$  then
         $M.\text{einfügen}(e)$ ;
        fertig := true;
    break;

```

9. Es seien  $e_1, \dots, e_s$  die Ecken, die in dieser Reihenfolge nach der angegebenen Regel entfernt werden. Ferner sei  $M_i = M \setminus \{e_1, \dots, e_i\}$  für  $i = 0, \dots, s$ . Dann ist  $M = M_0$  und  $M' = M_s$ . Im Folgenden wird mittels vollständiger Induktion nach  $i$  gezeigt, dass  $M_i$  die Eigenschaften (a) und (b) erfüllt. Der Induktionsanfang ergibt sich aus der letzten Aufgabe. Es sei nun  $i > 0$ , dann erfüllt  $M_{i-1}$  die Eigenschaften (a) und (b). Aus der Regel ergibt sich direkt, dass auch  $M_i$  eine zusammenhängende dominierende Menge von Ecken ist. Des Weiteren kann die entfernte Ecke  $e_i$  auf keinem kürzesten Weg von  $G$  liegen, hieraus ergibt sich auch die zweite Aussage für  $M_i$ . Damit ist der Beweis vollständig.
10. Es sei  $w$  die Wurzel des Breitensuchebaums und  $e$  eine Ecke auf dem  $b$ -ten Niveau. Damit diese beiden Ecken durch  $M$  abgedeckt sind, muss es Ecken  $w_M, e_M \in M$  mit  $h(w_M) \leq 1$  und  $h(e_M) \geq b - 1$  geben. Da  $M$  zusammenhängend ist, muss es einen Weg zwischen  $w_M$  und  $e_M$  mit Ecken aus  $M$  geben. Somit enthält  $M$  mindestens  $b - 1$  Ecken.
11. Für einen vollständig  $k$ -partiten Graphen  $G$  gilt  $\chi(G) = k$ . Nachdem die erste Ecke einer Teilmenge  $E_i$  durch den Greedy-Algorithmus die Farbe  $f_i$  erhalten hat, kann diese Farbe an keine Ecke einer anderen Teilmenge  $E_j$  mehr vergeben werden. Die restlichen Ecken von  $E_i$  werden jedoch unabhängig von ihrer Reihenfolge mit dieser Farbe gefärbt. Somit vergibt der Algorithmus genau  $k = \chi(G)$  Farben. Der Greedy-Algorithmus färbt die Graphen  $C_n$  mit ungeradem  $n$  für jede Reihenfolge der Ecken mit 3 Farben, d. h., mit der minimalen Anzahl von Farben. Die Graphen  $C_n$  sind jedoch nicht vollständig  $k$ -partit.
12. In konstanter Zeit kann festgestellt werden, ob es sich um den vollständigen Graphen mit vier Ecken handelt. In diesem Fall ist  $\chi(G) = 4$ . Andernfalls folgt aus dem Satz von Brooks (siehe Seite 175), dass  $\chi(G) \leq 3$  gilt. Mit linearem Aufwand kann geprüft werden, ob ein bipartiter Graph vorliegt, d. h., ob  $\chi(G) = 2$  ist. Ist  $G$  nicht bipartit, dann besteht  $G$  aus genau einer Ecke oder es gilt  $\chi(G) = 3$ .
13. Angenommen  $G$  besitzt einen hamiltonschen Kreis  $K$ . Da der Grad jeder Ecke gleich 3 ist, muss die Anzahl der Kanten von  $K$  gerade sein. Die Kanten von  $K$  lassen sich somit mit 2 Farben zulässig färben. Nun ist jede Ecke noch zu genau einer ungefärbten Kante inzident, somit lassen sich die restlichen Kanten von  $G$  alle mit einer Farbe färben. Hieraus folgt  $\chi'(G) = 3$ . Dieser Widerspruch zeigt, dass  $G$  nicht hamiltonsch ist.
14. (a) Ein 1-Baum existiert nur, falls der von den Ecken  $e_2, \dots, e_n$  induzierte Untergraph  $G'$  zusammenhängend und  $g(e_1) \geq 2$  ist. Es sei  $B$  ein minimal aufspannender Baum von  $G'$  und  $K_1$  die Menge der zu Ecke  $e_1$  inzidenten Kanten. Die beiden Kanten aus  $K_1$  mit den geringsten Bewertungen bilden zusammen mit den Kanten aus  $B$  einen minimalen 1-Baum. Der Aufwand des Algorithmus hängt vom Aufwand der Bestimmung eines minimal aufspannenden Baumes für  $G'$  ab. Vergleichen Sie hierzu die in Kapitel 3 vorgestellten Algorithmen.  
(b) Man beachte, dass  $W$  ein 1-Baum ist.
15. Es seien  $W_1$  und  $W_2$  wie in der Aufgabe beschrieben. Gibt es eine Ecke  $e$ , welche mehr als einmal auf  $W_1$  vorkommt, dann gibt es Kanten  $(e_1, e)$  und  $(e, e_2)$ , welche nacheinander auf  $W_1$  vorkom-

men. Ersetzt man diese beiden Kanten durch die Kante  $(e_1, e_2)$ , so folgt aus der Dreiecksungleichung und der Minimalität von  $W_1$ , dass der neu entstandene Weg die gleiche Länge wie  $W_1$  hat. Auf diese Art kann ein geschlossener einfacher Weg  $W'_1$  mit gleicher Länge wie  $W_1$  erzeugt werden, auf dem alle Ecken von  $G$  liegen. Hieraus folgt:

$$L(W_2) \geq L(W_1) = L(W'_1) \geq L(W_2).$$

Dies zeigt die Behauptung.

16. Es sei  $L_i$  die Summe der Längen der Kanten, welche bis zum  $i$ -ten Schritt ausgewählt und in den Weg  $W_i$  eingefügt werden. Es sei  $W_i = \langle e_1, \dots, e_i, e_1 \rangle$  der konstruierte Weg. Mittels vollständiger Induktion nach  $i$  wird bewiesen, dass  $L(W_i) \leq 2L_i$  für  $i = 2, \dots, n$  gilt. Für  $i = 2$  ist die Aussage klar. Sei nun  $i > 2$  und  $(e_s, f)$  die neu ausgewählte Kante. Da  $G$  die Dreiecksungleichung erfüllt, gilt

$$d(e_{s-1}, f) \leq d(e_{s-1}, e_s) + d(e_s, f)$$

bzw.

$$d(e_{s-1}, f) + d(e_s, f) - d(e_{s-1}, e_s) \leq 2d(e_s, f).$$

Mithilfe der Induktionsvoraussetzung folgt nun

$$\begin{aligned} L(W_i) &= L(W_{i-1}) + d(e_{s-1}, f) + d(e_s, f) - d(e_{s-1}, e_s) \\ &\leq 2L_{i-1} + 2d(e_s, f) \\ &= 2L_i. \end{aligned}$$

(Ist  $s = 1$ , so ersetze man in diesen Ungleichungen  $e_{s-1}$  durch  $e_i$ ). Man beachte, dass die ausgewählten Kanten genau die Kanten sind, welche auch der Algorithmus von Prim auswählt. Somit ist  $L(W_n) \leq 2K < 2OPT(G)$ , wobei  $K$  die Kosten eines minimal aufspannenden Baumes von  $G$  sind. Hieraus folgt die Aussage über den Wirkungsgrad. Der Algorithmus hat die gleiche Laufzeit wie der Algorithmus von Prim.

17. Auf  $W$  liegen für jede Ecke  $e$  genau zwei verschiedene zu  $e$  inzidente Kanten. Diese haben zusammen mindestens die Länge  $m(e)$ . Da jede Kante auf  $W$  zu genau zwei Ecken inzident ist, gilt:

$$\frac{1}{2} \sum_{e \in E} m(e) \leq L(W).$$

18. Die Funktion kantenFärbung gibt die Anzahl  $a$  der vergebenen Farben zurück. Der Aufwand der Funktion ist gleich  $O(a(n + m))$ .

```
function kantenFärbung(G : Graph) : Integer
  var zuordnung : Array[1..n] von Integer;
  var e_i, e_j : Ecke;
  var farbe : Integer;

  Initialisiere zuordnung mit 0;
  farbe := 0;
  while G.K ≠ ∅ do
    farbe := farbe + 1;
    foreach e_i in G.E do
      if zuordnung[i] < farbe then
        foreach e_j in N(e_i) do
          if zuordnung[j] < farbe then
            zuordnung[i] := farbe;
            zuordnung[j] := farbe;
            Färbe Kante (e_i, e_j) mit Farbe farbe;
            Entferne Kante (e_i, e_j) aus G.K;
            Entferne e_i bzw. e_j aus G.E wenn g(e_i) = 0 bzw. g(e_j) = 0;
            break;
  return farbe;
```

19. Zur Bestimmung des Wirkungsgrads des dargestellten Algorithmus werden die in Abschnitt 11.4 konstruierten Graphen  $G_r$  betrachtet. Sie haben eine minimale Eckenüberdeckung mit  $r$  Ecken. Die Konstruktion der Graphen bewirkt, dass der Algorithmus der Reihe nach die Ecken aus  $R_r, R_{r-1}, \dots, R_1$  auswählt, d. h., die Menge  $R$  wird als Eckenüberdeckung konstruiert. Wie in Abschnitt 11.4 gezeigt, gilt auch für diesen Algorithmus  $\mathcal{W}_{\mathcal{A}}(n) = O(\log n)$  und  $\mathcal{W}_{\mathcal{A}}^{\infty} = \infty$ . Mithilfe der in Abschnitt 5.2 entwickelten Datenstrukturen kann der Algorithmus mit Aufwand  $O(n + m)$  umgesetzt werden.
20. Der Algorithmus verwaltet ein Feld überdeckung, in dem alle zur Überdeckung gehörenden Ecken markiert werden. Die Ecken des Baumes werden gemäß der Tiefensuche besucht. Bei diesem Algorithmus gehören Blätter nicht zur konstruierten Überdeckung. Die Funktion eckenüberdeckung( $e_i$ , vorgänger) zeigt beim Verlassen einer Ecke an, ob die Kante ( $e_i$ , vorgänger) noch überdeckt werden muss. Der Funktionsaufruf eckenüberdeckung( $e$ ,  $\perp$ ) mit einer beliebigen Ecke  $e$  bestimmt eine minimale Eckenüberdeckung in linearer Zeit  $O(n + m)$ .

```

var überdeckung : Array[1..n] von Boolean;

function eckenÜberdeckung( $e_i$  : Ecke, vorgänger : Ecke) : Boolean
    var  $e_j$  : Ecke;
    überdeckung[i] := false;
    foreach  $e_j$  in N( $e_i$ ) do
        if  $e_j \neq$  vorgänger then
            überdeckung[i] := eckenÜberdeckung( $e_j$ ,  $e_i$ ) or überdeckung[i];
    return not überdeckung[i];

```

Die Korrektheit des Verfahrens wird durch vollständige Induktion nach  $n$ , der Anzahl der Ecken des Baumes  $B$ , geführt. Für  $n = 2$  erzeugt der Algorithmus offensichtlich eine minimale Eckenüberdeckung mit einer Ecke. Sei nun  $n > 2$ . Es sei  $e$  ein Blatt und  $e'$  der Vorgänger von  $e$  im Tiefensuchebaum. Hat  $e'$  keinen weiteren Nachfolger, so bestimmt der Algorithmus nach Induktionsvoraussetzung eine minimale Eckenüberdeckung  $U$  für den Baum  $B \setminus \{e', e\}$ . Somit ist  $U \cup \{e'\}$  eine minimale Eckenüberdeckung von  $B$ . Wie man leicht sieht, ist dies aber genau die Eckenüberdeckung, welche der Algorithmus für  $B$  produziert. Gibt es in  $B$  kein Blatt mit dieser Eigenschaft, so muss es in  $B$  ein Blatt  $e$  geben, sodass der Vorgänger  $e'$  ein weiteres Blatt als Nachfolger hat. Nach Induktionsvoraussetzung bestimmt der Algorithmus für den Baum  $B \setminus \{e\}$  eine minimale Eckenüberdeckung  $U$ . Wie man wieder leicht sieht, ist dies genau die Eckenüberdeckung, welche der Algorithmus für  $B$  produziert.

21. (a) Es sei  $U$  eine Eckenüberdeckung von  $G$ . Dann ist  $U$  auch eine Eckenüberdeckung von  $G_k$  mit  $b_{G_k}(U) \leq b_G(U) - b(k)$  (mindestens eine der beiden Ecken  $e_i, e_j$  ist in  $U$  enthalten). Ist  $U$  eine kostenminimale Eckenüberdeckung von  $G$  so gilt:

$$\rho(G_k) \leq b_{G_k}(U) \leq b_G(U) - b(k) = \rho(G) - b(k).$$

- (b) Der Algorithmus  $\mathcal{A}$  verändert schrittweise die Bewertungen der Ecken von  $G$ . Bezeichne die dabei betrachteten Kanten mit  $k_0, \dots, k_{s-1}$  und die entstehenden eckenbewerteten Graphen mit  $G_0 = G, G_1$  bis  $G_s$ . Durch vollständige Induktion wird bewiesen, dass  $\mathcal{A}(G_i) \leq 2\rho(G_i)$  für  $i = 0, \dots, s$  gilt. Wegen  $\mathcal{A}(G_0) = \mathcal{A}(G)$  und  $\rho(G_0) = \rho(G)$  ist damit die Aussage bewiesen. In  $G_s$  hat jede Kante mindestens eine Endecke, deren Bewertung gleich 0 ist. Somit ist  $\mathcal{A}(G_s) = \rho(G_s) = 0$ , dies zeigt die Gültigkeit der Induktionsvoraussetzung. Aus Teil (a) der Aufgabe folgt für  $i < s$  die Gültigkeit der Ungleichung  $\rho(G_{i+1}) \leq \rho(G_i) - b_{G_i}(k_i)$ . Ferner gilt  $\mathcal{A}(G_i) \leq \mathcal{A}(G_{i+1}) + 2b_{G_i}(k_i)$  und nach Induktionsvoraussetzung ist  $\mathcal{A}(G_{i+1}) \leq 2\rho(G_{i+1})$ . Aus diesen Ungleichungen folgt nun:

$$\mathcal{A}(G_i) \leq \mathcal{A}(G_{i+1}) + 2b_{G_i}(k_i) \leq 2\rho(G_{i+1}) + 2b_{G_i}(k_i) \leq 2\rho(G_i).$$

(c) Für einen beliebigen ungerichteten Graphen definiere eine nichtnegative Eckenbewertung durch  $b(e) = 1$  für jede Ecke  $e$ . Mit dieser Bewertung bestimmt der angegebene Algorithmus die gleiche Eckenüberdeckung wie  $\mathcal{A}_{\text{EU2}}$ .

(d) Die Kanten von  $G$  werden in einer beliebigen Reihenfolge betrachtet.

```

foreach  $k = (e, e')$  in  $G.K$  do
     $b(e) := b(e) - b(k);$ 
     $b(e') := b(e') - b(k);$ 
 $E := \{e \text{ Ecke von } G \mid b(e) = 0\};$ 

```

22. Ein polynomialer Algorithmus für das Optimierungsproblem löst natürlich auch das zugehörige Entscheidungsproblem. Es sei

```

function eckenÜberdeckung( $G : \text{Graph}$ ,  $\text{wert} : \text{Integer}$ ) : Boolean

```

eine Funktion, welche mit polynomialen Aufwand entscheidet, ob  $G$  eine Eckenüberdeckung mit  $\text{wert}$  Ecken hat. Mit maximal  $OPT$  Aufrufen dieser Funktion kann die Größe  $OPT$  der kleinsten Eckenüberdeckung von  $G$  bestimmt werden. Es sei nun  $(e, e')$  eine Kante des Graphen  $G$ . Dann liegt  $e$  oder  $e'$  in einer minimalen Eckenüberdeckung. Es sei  $U_e$  bzw.  $U_{e'}$  eine minimale Eckenüberdeckung des Graphen, der sich aus  $G$  ergibt, wenn alle zu  $e$  bzw. zu  $e'$  inzidenten Kanten entfernt werden. Ist  $|U_e| = OPT - 1$ , so ist  $U_e \cup \{e\}$  eine minimale Eckenüberdeckung von  $G$ , andernfalls  $U_{e'} \cup \{e'\}$ . Der beschriebene Algorithmus wird durch den Aufruf  $\text{minÜberdeckung}(G, OPT)$  der folgenden rekursiven Funktion umgesetzt:

```

function minÜberdeckung( $G : \text{Graph}$ ,  $\text{wert} : \text{Integer}$ ) : Menge von Kante
    if  $G.K = \emptyset$  then
        return  $\emptyset$ ;
    else
        Wähle beliebige Kante  $(e, e')$  aus  $G.K$ ;
         $G_e := G$  ohne die zu  $e$  inzidenten Kanten;
        if eckenÜberdeckung( $G_e$ ,  $\text{wert} - 1$ ) then
            return  $\{e\} \cup \text{minÜberdeckung}(G_e, \text{wert} - 1)$ ;
        else
             $G_{e'} := G$  ohne die zu  $e'$  inzidenten Kanten;
            return  $\{e'\} \cup \text{minÜberdeckung}(G_{e'}, \text{wert} - 1)$ ;

```

Insgesamt wird diese Funktion höchstens  $n$ -mal aufgerufen. Damit wird auch die Funktion  $\text{eckenÜberdeckung}$  höchstens  $n$ -mal aufgerufen, d. h., es liegt ein Algorithmus mit polynomialen Aufwand vor.

23. Ein polynomialer Algorithmus für das Optimierungsproblem löst natürlich auch das zugehörige Entscheidungsproblem. Es sei nun  $\mathcal{A}$  ein polynomialer Algorithmus für das Entscheidungsproblem. In einer ersten Phase werden die Kosten  $C$  für eine optimale Lösung berechnet, die Bestimmung der optimalen Rundreise erfolgt dann in der zweiten Phase. Ist  $l$  die Länge der Kodierung einer Instanz des Problems des Handlungsreisenden, so liegt  $C$  zwischen 0 und  $2^l$ . Mittels binärer Suche in Kombination mit Algorithmus  $\mathcal{A}$  kann  $C$  in höchstens  $n$  Schritten bestimmt werden. In der zweiten Phase wird Algorithmus  $\mathcal{A}$  für jede Kante einmal aufgerufen. Hierzu werden die Kosten der betrachteten Kante auf  $C + 1$  gesetzt. Ergibt die Anwendung von  $\mathcal{A}$ , dass dieser Graph keinen hamiltonschen Kreis mit Kosten  $C$  besitzt, so wird die Bewertung der Kante wieder auf den ursprünglichen Wert zurückgesetzt, andernfalls wird die Kante entfernt. Am Ende dieser Phase bilden die verbliebenen Kanten einen hamiltonschen Kreis mit Kosten  $C$  und das Optimierungsproblem ist gelöst. Insgesamt wurde Algorithmus  $\mathcal{A}$  höchstens  $n + m$ -mal aufgerufen, d. h., das Verfahren hat polynomialen Aufwand.

24. Ist  $e$  eine Ecke von  $G$  und  $T$  eine beliebige Teilmenge der Ecken von  $G$ , so wird mit  $N_T(e)$  im Folgenden die Menge der in  $T$  liegenden Nachbarn von  $e$  bezeichnet. Es sei  $e$  eine Ecke aus  $X$  mit  $N_X(e) > N_{\bar{X}}(e)$ . Wird nun  $e$  von  $X$  nach  $\bar{X}$  verschoben, so erhält der Schnitt  $(X, \bar{X})$  genau  $N_{\bar{X}}(e) - N_X(e) > 0$  zusätzliche Kanten. Auch bei der Verschiebung einer Ecke  $e$  aus  $\bar{X}$  mit  $N_{\bar{X}}(e) > N_X(e)$  nach  $X$  wird die Anzahl der Kanten im Schnitt erhöht. Da ein Schnitt maximal  $m$  Kanten enthält, endet das Verfahren spätestens nach  $m$  Schritten. Dann gilt  $N_X(e) \leq N_{\bar{X}}(e)$  für alle Ecken  $e$  aus  $X$ , und  $N_{\bar{X}}(e) \leq N_X(e)$  für alle Ecken aus  $\bar{X}$ . Nun kann der Wirkungsgrad leicht bestimmt werden. Es ist

$$2\mathcal{A}(G) = \sum_{e \in X} N_{\bar{X}}(e) + \sum_{e \in \bar{X}} N_X(e).$$

Hieraus folgt

$$\begin{aligned} \text{OPT}(G) &\leq m \\ &= \frac{1}{2} \left( \sum_{e \in X} (N_X(e) + N_{\bar{X}}(e)) + \sum_{e \in \bar{X}} (N_X(e) + N_{\bar{X}}(e)) \right) \\ &\leq \sum_{e \in X} N_{\bar{X}}(e) + \sum_{e \in \bar{X}} N_X(e) \\ &= 2\mathcal{A}(G). \end{aligned}$$

25. Das betrachtete Entscheidungsproblem liegt offenbar in  $\mathcal{NP}$ . Es wird ein Graph  $G$  mit Eckenmenge  $E = X \cup Y \cup Z$  konstruiert. Zwei Ecken  $a, b \in E$  sind genau dann benachbart, wenn es kein Element  $m \in M$  gibt, welches  $a$  und  $b$  gleichzeitig als Komponenten enthält. Der Graph  $G$  hat  $3q$  Ecken und lässt sich in polynomialer Zeit konstruieren. Ist  $(x, y, z) \in M$ , dann bilden  $x, y, z$  in  $G$  eine unabhängige Menge. Die von den Mengen  $X, Y$  und  $Z$  induzierten Untergraphen sind vollständig, somit ist  $\chi(G) \geq q$ . Es sei  $\mathcal{A}$  eine vier-elementige Teilmenge von  $E$ . Dann muss es in  $\mathcal{A}$  zwei Elemente geben, welche in der gleichen der drei Cliques liegen. Somit ist  $\alpha(G) \leq 3$ . Im Folgenden wird bewiesen, dass  $M$  genau dann eine 3-dimensionale Zuordnung besitzt, wenn  $\chi(G) = q$  gilt. Hieraus folgt unmittelbar die in der Aufgabe gemachte Aussage. Ist  $\chi(G) = q$ , so besteht  $G$  aus genau  $q$  Farbklassen mit je drei Elementen. Es sei  $\{a, b, c\}$  mit  $a \in X, b \in Y$  und  $c \in Z$  eine solche Farbklassse. Nach Konstruktion von  $G$  gibt es  $x \in X, y \in Y$  und  $z \in Z$ , sodass  $(x, b, c), (a, y, c), (a, b, z)$  in  $M$  liegen. Wegen der paarweisen Konsistenz muss dann auch  $(a, b, c)$  in  $M$  liegen. Hieraus folgt, dass die aus den Farbklassen gebildeten Elemente aus  $M$  eine 3-dimensionale Zuordnung bilden. Umgekehrt gilt, dass jede 3-dimensionale Zuordnung auf  $G$  eine disjunkte Überdeckung mit 3-elementigen unabhängigen Mengen induziert, d. h., es gilt  $\chi(G) = q$ .
26. Bezeichne die beiden berechneten unabhängigen Mengen mit  $I_1$  und  $I_2$ . Der erste Teil des Algorithmus entspricht der Funktion `greedyZuordnung` aus Aufgabe 5. Besteht die erzeugte Zuordnung  $Z$  aus  $m'$  Kanten, so gilt  $|I_1| = n - 2m'$ . Wegen  $m' < n/2$  gibt es eine Zahl  $\gamma \in [0, 1]$  mit  $m' = n(1 - \gamma)/2$  bzw.  $|I_1| = n\gamma$ . Nun bildet  $|Z| + |I_1|$  eine obere Abschätzung für  $\alpha(G)$ , hieraus folgt:

$$\alpha(G) \leq \frac{n}{2}(1 + \gamma). \quad (11.1)$$

Nun wird der zweite Teil des Algorithmus betrachtet. Im ersten Durchlauf der **while**-Schleife werden  $\delta + 1$  Ecken entfernt. In jedem weiteren Schritt werden höchstens  $\Delta$  Ecken aus  $E$  entfernt. Dazu beachte man, dass es wegen des Zusammenhangs von  $G$  mindestens eine Ecke im Restgraphen geben muss, der Grad kleiner oder gleich  $\Delta - 1$  ist. Somit gilt:

$$|I_2| \geq \frac{n - (\delta + 1)}{\Delta} + 1. \quad (11.2)$$

Aus Gleichung (11.1) und  $|I_1| = n\gamma$  folgt:

$$\frac{\alpha(G)}{|I_1|} \leq \frac{\gamma + 1}{2\gamma}. \quad (11.3)$$

Aus Gleichung (11.1) und (11.2) folgt:

$$\frac{\alpha(G)}{|I_2|} \leq \frac{\frac{n}{2}(1+\gamma)}{\frac{n-(\delta-1)+\Delta}{\Delta}} = \frac{\Delta n(1+\gamma)}{2(n-(\delta+1)+\Delta)} \leq \frac{\Delta n(1+\gamma)}{2(n-1)}. \quad (11.4)$$

Für die folgende Analyse beachte man, dass für  $\gamma \in [0, 1]$  die Funktion  $(\gamma + 1)/2\gamma$  monoton fallend und die Funktion  $\Delta n(1 + \gamma)/2(n - 1)$  monoton steigend ist. Für die Bestimmung des Wirkungsgrads des Algorithmus ist der Schnittpunkt  $S = (n - 1)/\Delta n$  der beiden Funktionen von Bedeutung. Für  $\gamma \leq S$  ist  $|I_2| \geq |I_1|$  und für  $\gamma \geq S$  ist  $|I_1| \geq |I_2|$ . Aus den Gleichungen (11.3) bzw. (11.4) ergibt sich die angegebene Schranke für den Wirkungsgrad.

27. Es sei  $d_i$  der Eckengrad der Ecke im Restgraphen, welche in Durchlauf  $i$  entfernt wurde. Dann gilt folgende Beziehung zwischen  $n$  und den  $d_i$ :

$$n = \sum_{i=1}^{|I_2|} (d_i + 1).$$

Da jedes Mal die Ecke mit dem kleinsten Eckengrad ausgewählt wird, haben im  $i$ -ten Schritt alle entfernten Ecken mindestens den Eckengrad  $d_i$ . Somit werden im  $i$ -ten Schritt mindestens  $d_i(d_i + 1)/2$  Kanten entfernt. Hieraus folgt:

$$\frac{\bar{d}n}{2} = |E| \geq \sum_{i=1}^{|I_2|} d_i(d_i + 1)/2.$$

Addiert man das zweifache der letzten Gleichung zu der ersten Gleichung, so erhält man mittels der Cauchy-Schwartz Ungleichung und der ersten Gleichung:

$$(\bar{d} + 1)n \geq \sum_{i=1}^{|I_2|} (d_i + 1)^2 \geq \frac{1}{|I_2|} \left( \sum_{i=1}^{|I_2|} (d_i + 1) \right)^2 \geq \frac{n^2}{|I_2|}.$$

Hieraus ergibt sich sofort die Behauptung.

28. Die Aussage gilt für  $|E| = 1$ . Es sein  $f \in E$  eine Ecke mit minimalem Eckengrad,  $\bar{E} = E \setminus N[f]$  und  $H$  der von  $\bar{E}$  induzierte Untergraph. Dann gilt

$$\begin{aligned} \alpha(G) &\geq 1 + \alpha(H) \\ &\geq 1 + \sum_{e \in \bar{E}} \frac{1}{g_H(e) + 1} \\ &= \sum_{e \in N[f]} \frac{1}{g(f) + 1} + \sum_{e \in \bar{E}} \frac{1}{g_H(e) + 1} \\ &\geq \sum_{e \in N[f]} \frac{1}{g(e) + 1} + \sum_{e \in \bar{E}} \frac{1}{g(e) + 1} \\ &= \sum_{e \in E} \frac{1}{g(e) + 1}. \end{aligned}$$

Die zweite Ungleichung folgt aus der Induktionsannahme und die dritte Ungleichung gilt, da der Grad von  $f$  minimal ist und  $g_H(e) \leq g(e)$  ist. Es sei  $G = P_3$ . Dann ist  $\alpha(G) = 2$ , die beiden Schranken sind  $9/7$  und  $4/3$ .

29. Der Beweis erfolgt mittels vollständiger Induktion nach der Anzahl der Ecken des Graphen. Für  $n = 1$  ist die Behauptung trivial. Es sei nun  $G$  ein Graph mit  $n > 1$  Ecken. Die Funktion unabhängigeMenge bestimmt eine unabhängige Menge  $U$  mit  $u(n)$  Ecken. Es sei  $G' = G \setminus U$ . Nach Induktionsvoraussetzung erzeugt färbung für  $G'$  eine Färbung mit höchstens

$$\sum_{i=1}^{n-u(n)} \frac{1}{u(i)}$$



Farben und für  $G$  wird genau eine zusätzliche Farbe benötigt. Da  $u$  monoton steigend ist, gilt

$$\sum_{i=n-u(n)+1}^n \frac{1}{u(i)} \geq \sum_{i=n-u(n)+1}^n \frac{1}{u(n)} = 1.$$

Hieraus folgt die Behauptung.

30. Erfüllen die Bewertungen der Kanten die Dreiecksungleichung, so gilt  $L \leq 2K$ . Im Allgemeinen gibt es aber keine solche Konstante, wie der folgende Graph zeigt, hierbei ist  $L$  von  $b$  abhängig und  $K$  von  $b$  unabhängig.

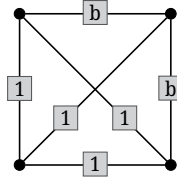

31. Das betrachtete Entscheidungsproblem liegt offenbar in  $\mathcal{NP}$ . Für einen gegebenen zusammenhängenden Graphen  $G$  wird wie im Hinweis zur Aufgabe ein neuer Graphen  $G'$  konstruiert. Es sei

$$S = \{x_{ee'} \mid (e, e') \text{ ist Kante von } G\} \cup \{e_n\}.$$

Es sei  $s_{stei}$  das Gewicht eines minimalen Steinerbaums von  $G'$  für  $S$  und  $s_{deck}$  die Anzahl der Ecken in einer minimalen Eckenüberdeckung für  $G$ . Im Folgenden wird bewiesen, dass  $s_{stei} = s_{deck} + m$  gilt. Hieraus folgt unmittelbar die in der Aufgabe gemachte Aussage.

Es sei  $M$  eine minimale Eckenüberdeckung von  $G$ . Dann ist der von  $S \cup M$  induzierte Untergraph  $U$  von  $G'$  zusammenhängend. Hierzu beachte man, dass  $e_n$  zu jeder Ecke aus  $M$  benachbart ist und jede Ecke aus  $S \setminus \{e_n\}$  zu einer Ecke aus  $M$  benachbart sein muss ( $M$  ist eine Eckenüberdeckung). Da alle Kanten die Bewertung 1 haben, hat ein aufspannender Baum von  $U$  das Gewicht  $|S \cup M| = s_{deck} + m$ . Hieraus folgt  $s_{stei} \leq s_{deck} + m$ . Sei nun  $T$  ein minimaler Steiner Baum von  $G'$  für  $S$  und  $S'$  die Menge der Steiner Ecken von  $T$ . Nach Konstruktion von  $G'$  bildet  $S'$  eine Eckenüberdeckung von  $G$ : Ist  $k = (e, e')$  eine Kante von  $G$ , so gibt es in  $T$  einen Weg von  $e_n$  nach  $x_{ee'}$ , dieser verwendet eine der Ecken  $e$  und  $e'$ , d. h.,  $e$  oder  $e'$  liegt in  $S'$ . Hieraus folgt:

$$s_{deck} \leq |S'| = s_{stei} + 1 - |S| = s_{stei} - m.$$

32. Der Greedy-Algorithmus vergibt maximal  $\Delta + 1$  Farben. Nach Aufgabe 30 aus Kapitel 2 enthält jeder Unit Disk Graph eine Clique mit mindestens  $\lceil \Delta/6 \rceil + 1$  Ecken. Somit ist  $\chi \geq \lceil \Delta/6 \rceil + 1$ . Hieraus folgt:

$$\frac{OPT}{\chi} \leq \frac{\Delta + 1}{\lceil \Delta/6 \rceil + 1} \leq 6.$$

33. Es sei  $S^*$  eine optimale Lösung des  $k$ -Zentrum Problem und  $S = \{e_1, \dots, e_k\}$  die Ausgabe des Algorithmus. Ferner sei  $OPT = \max_{e \in E} d(e, S^*)$  und  $e^* \in E \setminus S$  mit

$$d(e^*, S) = \max\{d(e, S) \mid e \in E \setminus S\} = r^*.$$

Es genügt zu zeigen, dass  $2OPT \geq r^*$  gilt. Angenommen es gilt  $r^* > 2OPT$ . Dann gilt für alle  $i = 1, \dots, k$

$$d(e^*, e_i) > 2OPT.$$

Ferner gilt  $d(e_i, e_j) > 2OPT$  für alle  $i \neq j$ , ansonsten wäre  $e^*$  durch den Algorithmus in  $S$  eingefügt worden. Somit ist der Abstand von je zwei verschiedenen Ecken aus  $S \cup \{e^*\}$  echt größer als  $2OPT$ . Für jedes  $e \in E$  gibt es  $\hat{e} \in S^*$  mit  $d(e, \hat{e}) \leq OPT$ . Also gibt es ein Paar von Ecken  $e_1, e_2$  aus  $S \cup \{e^*\}$  und eine Ecke  $f \in S^*$  mit  $\max\{d(f, e_1), d(f, e_2)\} \leq OPT$ . Hieraus folgt  $d(e_1, e_2) \leq 2OPT$ . Widerspruch. Somit ist der Wirkungsgrad des Algorithmus höchstens 2.



# Kapitel 12 – Randomisierte Algorithmen

1. Es wird eine Zufallsvariable  $Z$  eingeführt:  $Z = m - |S|$ . Es gilt  $\mathbb{E}[Z] = m - \mathbb{E}[|S|] = m/2$ . Die Markov-Ungleichung besagt  $\mathbb{P}[Z \geq a] \leq \mathbb{E}[Z]/a$  für  $a > 0$ . Also ist  $\mathbb{P}[Z \geq a] \leq \frac{m}{2a}$  und somit  $\mathbb{P}[|S| \leq m - a] \leq \frac{m}{2a}$ . Es sei  $a = (1/2 + \epsilon)m$ . Damit gilt

$$\mathbb{P}[|S| < (1/2 - \epsilon)m] \leq \frac{1}{1 + 2\epsilon} \text{ und } \mathbb{P}[|S| \geq (1/2 - \epsilon)m] \geq \frac{2\epsilon}{1 + 2\epsilon}.$$

Die Aussage folgt aus dem Verstärkungssatz. Für  $\epsilon = 1/6$  ergeben  $4 \ln n$  Wiederholungen mit hoher Wahrscheinlichkeit einen Schnitt mit  $m/3$  Kanten.

2. Wir betrachten den zyklischen Graph  $C_n$ . Dieser Graph hat  $\binom{n}{2}$  verschiedene minimale Schnitte, für jedes Paar von Kanten einen minimalen Schnitt. Jeder dieser Schnitte wird von Algorithmus  $\mathcal{A}_K$  mit der gleichen Wahrscheinlichkeit  $2/(n(n-1))$  gefunden.
3. Der Graph  $G$  besteht aus dem vollständigen Graphen  $K_{n-1}$  und einer zusätzlichen Ecke, diese ist zu einer beliebigen Ecken von  $K_{n-1}$  verbunden.
4. Es muss lediglich die Zielfunktion geändert werden:

$$\text{minimiere } \sum_{e \in E} x_e b(e).$$

Es sei  $\hat{x}$  eine Lösung der LP-Relaxation,  $g^{Rd}$  das Gewicht der Rundung von  $\hat{x}$  und  $g^*$  das Gewicht einer optimalen Lösung des ILP-Problems. Dann gilt

$$g^* \geq \sum_{e \in E} \hat{x}_e b(e) \geq \sum_{e \in E \text{ mit } \hat{x}_e \geq 1/2} b(e)/2 = g^{Rd}.$$

Somit ist der Wirkungsgrad höchstens 2.

Für den angegebenen Graph ist  $\hat{x} = (0.5, 0.5, 0.5, 1, 0)$ , die Lösung hat ein Gewicht von 5.5. Die Rundung ergibt  $(1, 1, 1, 1, 0)$  und  $g^{Rd} = 10$ . Die optimale Lösung ist  $(1, 0, 1, 1, 0)$  und  $g^* = 6$ .

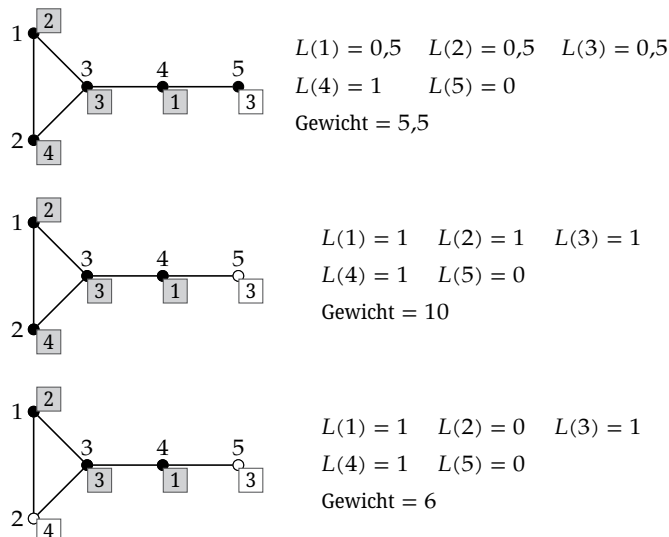

5.  $D$  ist offensichtlich eine dominierende Menge. Es gilt  $\mathbb{E}[|X|] = pn$ . Für  $e \in E$  definiere eine Indikatorvariable  $Y_e$ , der Wert ist 1 falls  $e \in Y$ . Dann gilt

$$\mathbb{P}[Y_e = 1] \leq (1 - p)^{\delta+1}.$$

Hieraus folgt

$$\mathbb{E}x[Y] = \sum_{e \in E} \mathbb{E}x[Y_e] = \sum_{e \in E} \mathbb{P}r[Y_e = 1] \leq n(1-p)^{\delta+1}.$$

Also ist

$$\mathbb{E}x[D] \leq pn + n(1-p)^{\delta+1}.$$

Wegen  $1 - x \leq e^{-x}$  folgt  $\mathbb{E}x[D] \leq n(p + e^{-p(\delta+1)})$ . Die rechte Seite wird für  $p = \frac{\ln(\delta+1)}{\delta+1}$  minimal und es gilt

$$\mathbb{E}x[D] \leq \frac{n(1 + \ln(\delta+1))}{\delta+1}.$$

6. Es sei  $(t_1, \dots, t_n)$  eine beliebige Permutation von  $(1, \dots, n)$ . Dann gilt

$$\begin{aligned} \mathbb{P}r[a[i] = t_i \text{ für } 1 \leq i \leq n] &= \mathbb{P}r[a[n] = t_n] \\ &\quad \cdot \mathbb{P}r[a[n-1] = t_{n-1} \mid a[n] = t_n] \\ &\quad \cdot \mathbb{P}r[a[n-2] = t_{n-2} \mid a[n] = t_n \wedge a[n-1] = t_{n-1}] \\ &\quad \dots \\ &\quad \cdot \mathbb{P}r[a[1] = t_1 \mid a[i] = t_i \text{ für } i = n, \dots, 2]. \end{aligned}$$

Es gilt  $\mathbb{P}r[a[n] = t_n] = 1/n$  und  $\mathbb{P}r[a[n-1] = t_{n-1} \mid a[n] = t_n] = 1/(n-1)$ . Allgemein gilt für  $i = 1, \dots, n$

$$\mathbb{P}r[a[i] = t_i \mid a[j] = t_j \text{ für } j = n, \dots, i+1] = 1/i.$$

Hieraus folgt  $\mathbb{P}r[a[i] = t_i \text{ für } 1 \leq i \leq n] = 1/n!$ , d. h. jede Permutation wird mit der gleichen Wahrscheinlichkeit ausgegeben. Die Laufzeit ist  $O(n)$ .

7. Wir verwenden die gleiche Notation wie im Beweis des Satzes in Abschnitt 12.6.2, d. h. wir verwenden die Zufallsvariablen  $X_{e,f}^i$  und  $Y_{e,f}$ . Es gilt  $Y_{e,f} = \sum_{i=1}^S X_{e,f}^i$  und

$$\mathbb{E}x[Y_{e,f}] = \sum_{i=1}^S \mathbb{E}x[X_{e,f}^i] = \sum_{i=1}^S \sum_{P \in Q_i: (e,f) \in P} \hat{x}_P = \sum_{P \in Q: (e,f) \in P} \hat{x}_P \leq B^*,$$

hierbei ist  $Q = \cup_{i=1}^S Q_i$ . Aus der Chernoff-Ungleichung folgt für  $\delta = 1$  und  $U = (c \ln n)B^*$  mit  $c \geq 12$

$$\mathbb{P}r[Y_{e,f} \geq 2U] \leq e^{-(c \ln n)B^*/3} \leq e^{-(c/3) \ln n} = \frac{1}{n^{c/3}}.$$

Die zweite Ungleichung gilt wegen  $B^* \geq 1$ . Da die Anzahl der Kanten von  $G$  durch  $n^2$  beschränkt ist, folgt aus der Bonferroni-Ungleichung

$$\mathbb{P}r\left[\max_{(e,f) \in K} Y_{e,f} \geq 2U\right] \leq \sum_{(e,f) \in K} \mathbb{P}r[Y_{e,f} \geq 2U] \leq \frac{|K|}{n^{c/3}} \leq n^{2-\frac{c}{3}}.$$

Hieraus folgt  $\mathbb{P}r[B_{MGF} < (2c \ln n)B^*] \geq 1 - \frac{1}{n^2}$ , d. h. mit hoher Wahrscheinlichkeit liegt die maximale Belastung in  $O(\log n)B^*$ .

8. Es  $\hat{x}$  eine Lösung der LP-Relaxation. Die in Abbildung 12.5 dargestellte Funktion bewerteteUnabhängigeMenge wird nur an einer Stelle geändert: Jede Ecke  $e$  wird mit der Wahrscheinlichkeit  $\hat{x}_e/(2\Delta)$  in  $I$  eingefügt. Die erzeugte Menge  $I = \mathcal{A}_{\text{BUM}}(G)$  ist offensichtlich eine unabhängige Menge. Wir werden zeigen, dass  $\mathbb{E}x[b(I)] \geq \frac{\hat{b}}{4\Delta}$  gilt. Falls  $\hat{b} \leq 4B\Delta$  dann ist  $b(I) = B \geq \frac{\hat{b}}{4\Delta}$ . Wir betrachten nun den Fall  $\hat{b} > 4B\Delta$ . Es seien  $I_1$  und  $I_2$  die Mengen der Ecken, welche in der ersten for-Schleife eingefügt bzw. in der zweiten for-Schleife entfernt werden. Dann gilt  $I = I_1 \setminus I_2$ . Zunächst werden Indikatorvariablen  $X_e$  und  $Y_{e,f}$  eingeführt. Für jede Ecke  $e$  ist  $X_e = 1$  falls  $e \in I_1$  und für jede Kante  $(e,f) \in K$  ist  $Y_{e,f} = 1$  falls  $e$  und  $f$  in  $I_1$  sind. Somit gilt

$$b(I_1) = \sum_{e \in E} b(e)X_e \quad \text{und} \quad b(I_2) \leq \sum_{(e,f) \in K} (b(e) + b(f))Y_{e,f}.$$

Ferner ist  $\mathbb{E}_{\mathbb{X}}[b(I_1)] = \sum_{e \in E} b(e) \mathbb{E}_{\mathbb{X}}[X_e] = \sum_{e \in E} b(e) \hat{x}_e / (2\Delta) = \hat{b} / (2\Delta)$  und  $\mathbb{E}_{\mathbb{X}}[Y_{e,f}] = \frac{\hat{x}_e \hat{x}_f}{4\Delta^2}$ . Für jede Ecke  $e$  gilt  $\sum_{f \in N(e)} \hat{x}_f \leq \Delta$ . Hieraus folgt

$$\begin{aligned} \mathbb{E}_{\mathbb{X}}[b(I_2)] &\leq \sum_{(e,f) \in K} (b(e) + b(f)) \mathbb{E}_{\mathbb{X}}[Y_{e,f}] \\ &= \frac{1}{4\Delta^2} \sum_{(e,f) \in K} (b(e) + b(f)) \hat{x}_e \hat{x}_f \\ &= \frac{1}{4\Delta^2} \sum_{e \in E} b(e) \hat{x}_e \sum_{f \in N(e)} \hat{x}_f \\ &\leq \frac{\hat{b}\Delta}{4\Delta^2} \\ &= \frac{\hat{b}}{4\Delta} \end{aligned}$$

und somit

$$\mathbb{E}_{\mathbb{X}}[b(I)] = \mathbb{E}_{\mathbb{X}}[b(I_1)] - \mathbb{E}_{\mathbb{X}}[b(I_2)] \geq \frac{\hat{b}}{2\Delta} - \frac{\hat{b}}{4\Delta} = \frac{\hat{b}}{4\Delta}.$$

Folglich ist  $\mathcal{W}_{\mathcal{A}_{\text{BUM}}}(n) \leq 4\Delta$ .

9. Es sei  $S = \mathcal{A}_{\text{MC}}(G)$ . Für jede Kante  $k$  wird eine Indikatorvariable  $Y_k$  eingeführt. Der Wert von  $Y_k$  ist gleich dem Gewicht  $g(k)$  von  $k$  falls  $k \in S$ , andernfalls ist  $Y_k = 0$ . Somit ist  $g(\mathcal{A}_{\text{MC}}(G)) = \sum_{k \in K} Y_k$ . Da die durchgeführten Bernoulli-Experimente unabhängig sind gilt  $\mathbb{P}_{\mathbb{R}}[Y_k = b(k)] = 1/2$  und  $\mathbb{E}_{\mathbb{X}}[Y_k] = b(k)/2$ .

$$\begin{aligned} \mathbb{E}_{\mathbb{X}}[g(\mathcal{A}_{\text{MC}}(G))] &= \mathbb{E}_{\mathbb{X}}\left[\sum_{k \in K} Y_k\right] \\ &= \sum_{k \in K} \mathbb{E}_{\mathbb{X}}[Y_k] \\ &= \frac{1}{2} \sum_{k \in K} g(k) \\ &\geq \frac{g^*(G)}{2}. \end{aligned}$$

10. Wir betrachten  $w$  unabhängige Wiederholungen von Algorithmus  $\mathcal{A}_{\text{MC}}$  und wählen unter allen berechneten Schnitten  $S_i$  den größten Schnitt  $S^*$  aus, d. h.  $|S^*| = \max_{1, \dots, w} |S_i|$ . Wie in Aufgabe 1 bewiesen, gilt  $\mathbb{P}_{\mathbb{R}}[|S_i| < (1/2 - \epsilon)m] \leq \frac{1}{1+2\epsilon}$  für alle  $i \leq w$ . Hieraus folgt

$$\begin{aligned} \mathbb{P}_{\mathbb{R}}[|S^*| < (1/2 - \epsilon)m] &= \mathbb{P}_{\mathbb{R}}[|S_i| < (1/2 - \epsilon)m \text{ für alle } 1, \dots, w] \\ &= \prod_{1, \dots, w} \mathbb{P}_{\mathbb{R}}[|S_i| < (1/2 - \epsilon)m] \\ &\leq \prod_{1, \dots, w} \frac{1}{1+2\epsilon} \\ &= \left(\frac{1}{1+2\epsilon}\right)^w \\ &\leq \left(\frac{1}{1+2\epsilon}\right)^{\frac{\log n}{\log(1+2\epsilon)}} = 2^{-\log n} = \frac{1}{n}. \end{aligned}$$

Somit gilt  $\mathbb{P}_{\mathbb{R}}[|S^*| \geq (1/2 - \epsilon)m] \geq 1 - 1/n$ .

11. Für jede Kante  $k$  wird eine Indikatorvariable  $X_k$  eingeführt. Ihr Wert ist 1, falls die Enden von  $k$  unterschiedliche Farbe tragen. Dann ist  $F(G) = \sum_{k \in K} X_k$  und

$$\mathbb{E}_{\mathbb{X}}[X_{(e,f)}] = \mathbb{P}_{\mathbb{R}}[\text{Farbe}(e) \neq \text{Farbe}(f)] = 2/3.$$

Aus der Linearität des Erwartungswertes folgt  $\mathbb{E}_{\mathbb{X}}[F(G)] = 2m/3$ .

Führe eine Zufallsvariable  $Z$  mit Wert  $m - F(G)$  ein. Dann ist  $\mathbb{E}[Z] = m/3$ . Aus der Markov-Ungleichung folgt

$$\mathbb{P}[Z \geq m/2] \leq (m/3)/(m/2) = 2/3.$$

Somit ist  $\mathbb{P}[F(G) \leq m/2] \leq 2/3$  bzw.  $\mathbb{P}[F(G) \geq m/2] \geq 1/3$ .

Aus dem Verstärkungssatz folgt, dass bei 6  $\ln n$ -facher Wiederholung von  $\mathcal{A}_{F3}$  das gewünschte Ergebnis mit Wahrscheinlichkeit  $1 - 1/n^2$  gefunden wird.

12. Die Wahrscheinlichkeit, dass die häufigste Antwort falsch ist, ist maximal so hoch wie die Wahrscheinlichkeit, dass höchstens  $\lfloor t/2 \rfloor$  der  $t$  Antworten richtig sind.

$$\begin{aligned} \mathbb{P}[\text{Häufigste Antwort ist falsch}] &\leq \sum_{i=0}^{\lfloor t/2 \rfloor} \binom{t}{i} \left(\frac{1}{2} + \epsilon\right)^i \left(\frac{1}{2} - \epsilon\right)^{t-i} \\ &\leq \sum_{i=0}^{\lfloor t/2 \rfloor} \binom{t}{i} \left(\frac{1}{2} + \epsilon\right)^{t/2} \left(\frac{1}{2} - \epsilon\right)^{t/2} \\ &= \sum_{i=0}^{\lfloor t/2 \rfloor} \binom{t}{i} \left(\frac{1}{4} - \epsilon^2\right)^{t/2} \\ &= \frac{(1 - 4\epsilon^2)^{t/2}}{2^t} \sum_{i=0}^{\lfloor t/2 \rfloor} \binom{t}{i} \\ &\leq (1 - 4\epsilon^2)^{t/2} \\ &\leq e^{-2t\epsilon^2} \end{aligned}$$

Für die zweite Ungleichung beachte man, dass für  $i \leq t/2$

$$\left(\frac{1}{2} + \epsilon\right)^i \left(\frac{1}{2} - \epsilon\right)^{t-i} \leq \left(\frac{1}{2} + \epsilon\right)^{t/2} \left(\frac{1}{2} - \epsilon\right)^{t/2}$$

genau dann gilt, wenn

$$\left(\frac{1}{2} + \epsilon\right)^{i-t/2} \leq \left(\frac{1}{2} - \epsilon\right)^{i-t/2}$$

bzw. wenn

$$\left(\frac{1}{2} + \epsilon\right)^{t/2-i} \geq \left(\frac{1}{2} - \epsilon\right)^{t/2-i}$$

gilt. Für die letzte Ungleichung wurde  $1 - x \leq e^{-x}$  genutzt.

13. Es seien  $X$  die Menge der Ecken, welche in der ersten for-Schleife eingefügt werden. Dann gilt  $\mathbb{E}[|X|] = nd$ . Es sei  $Y$  eine Zufallsvariable, deren Wert gleich der Anzahl der Kanten in dem von  $E \setminus X$  induzierten Untergraph  $G_1$  ist. Eine Kante  $(e, f)$  aus  $G$  ist in  $G_1$ , falls weder  $e$  noch  $f$  ausgewählt wurden. Somit ist

$$\mathbb{E}[Y] = md^2 = \frac{nd}{2}.$$

Somit ist der Erwartungswert für die Anzahl der in der zweiten Schleifen gelöschten Ecken höchstens  $2d/n$ . Somit ist

$$\mathbb{E}[|I|] \geq nd - \frac{nd}{2} = \frac{nd}{2} = \frac{n^2}{4m}.$$

Für jede Zufallsvariable  $Z$  gilt  $\mathbb{P}[Z \geq \mathbb{E}[Z]] > 0$ . Somit ist  $\mathbb{P}[|I| \geq \frac{n^2}{4m}] > 0$ , d. h. es muss eine unabhängige Menge mit mindestens  $n^2/4m$  Ecken geben.

14. Für jede Ecke  $e$  von  $G$  sei  $Y_e$  eine Indikatorvariable mit Wert 1, falls  $e \in I$ . Aus der Linearität des Erwartungswertes folgt

$$\mathbb{E}[|I|] = \sum_{e \in E} \mathbb{E}[Y_e] = \sum_{e \in E} \mathbb{P}[Y_e = 1].$$

Genau dann ist  $Y_e = 1$  falls in der betrachteten Reihenfolge der Ecken, Ecke  $e$  vor allen Nachbarn von  $e$  vorkommt. Für  $f \in N[e]$  sei  $O_f$  die Menge der Anordnungen der Ecken von  $G$ , bei denen  $f$  vor allen Ecken aus  $N[e] \setminus \{f\}$  auftritt. Dann gilt  $\mathbb{P}[Y_e = 1] = \frac{|O_f|}{n!}$ . Es sei  $o$  eine beliebige Anordnung von  $E$  und  $f$  die Ecke von  $N[e]$ , welche in  $o$  als erstes vorkommt. Dann gilt  $o \in O_f$ . Dann enthält  $\bigcup_{f \in N[e]} O_f$  alle Anordnungen von  $E$  und  $O_{f_1} \cap O_{f_2} = \emptyset$  falls  $f_1 \neq f_2$ . Aus Gründen der Symmetrie enthalten die Mengen  $O_f$  für alle  $f \in N[e]$  die gleiche Anzahl von Elementen, d. h.

$$n! = (g(e) + 1)|O_f|.$$

Somit ist die Wahrscheinlichkeit, dass  $e$  vor allen Ecken aus  $N(e)$  auftritt gleich  $1/(g(e) + 1)$ . Da zu diesem Zeitpunkt  $N(e) \cap I = \emptyset$  gilt wird  $e$  in  $I$  eingefügt. Also gilt

$$\mathbb{P}[Y_e = 1] = \frac{1}{g(e) + 1} \geq \frac{1}{\Delta + 1} \text{ und somit } \mathbb{E}[|I|] \geq \frac{n}{\Delta + 1}.$$

Es genügt also zu zeigen, dass eine maximale unabhängige Menge  $I_{max}$  höchstens  $\frac{\Delta n}{\Delta + 1}$  Ecken enthält. Dazu beachte man, dass jede Ecke  $e \in I_{max}$  mindestens einen Nachbar in  $E \setminus I_{max}$  hat. Daher gilt

$$|I_{max}| \leq \sum_{e \in E \setminus I_{max}} |N(e)| \leq \Delta |E \setminus I_{max}| = \Delta(n - |I_{max}|)$$

und somit auch  $|I_{max}|(\Delta + 1) \leq \Delta n$ . Somit ist der erwartete Wirkungsgrad höchstens

$$\frac{\Delta n}{\Delta + 1} \bigg/ \frac{n}{\Delta + 1} = \Delta.$$
